# Supplementary material for: [Retracted] Identifying a 6‐Gene Prognostic Signature for Lung Adenocarcinoma Based on Copy Number Variation and Gene Expression Data
Source: Hindawi journal article supplement (doi:10.1155/2022/6962163), 2022-01-01
Supplement: f9 [file 6962163.f9.pdf]

Supplementary Table 1. The gene expressions and CNV status of the six-gene in TCGA datasets

| Samples         | EFNB2    | GOLM1    | HMMR     | POSTN    | TPSB2    | CBFA2T3  |
|-----------------|----------|----------|----------|----------|----------|----------|
| TCGA-05-4249-01 | 4.156575 | 9.200184 | 2.430962 | 7.348549 | 7.152475 | 2.736505 |
| TCGA-05-4250-01 | 7.874615 | 7.948476 | 5.00103  | 8.129815 | 4.164597 | 1.444319 |
| TCGA-05-4382-01 | 3.877466 | 8.473123 | 2.78763  | 7.269288 | 3.265551 | 1.660063 |
| TCGA-05-4384-01 | 5.602593 | 6.698497 | 2.415919 | 6.06387  | 3.988841 | 2.191705 |
| TCGA-05-4389-01 | 4.037751 | 7.04438  | 3.74004  | 6.511187 | 5.998693 | 1.607254 |
| TCGA-05-4390-01 | 4.019177 | 7.782666 | 4.745103 | 8.003848 | 3.99464  | 0.921997 |
| TCGA-05-4396-01 | 4.473163 | 10.23627 | 4.014002 | 6.163232 | 2.904914 | 1.969731 |
| TCGA-05-4397-01 | 3.289962 | 7.234599 | 6.594391 | 4.272276 | 1.605134 | 0.807042 |
| TCGA-05-4398-01 | 4.231098 | 7.909911 | 4.385256 | 6.865165 | 3.889942 | 2.724519 |
| TCGA-05-4402-01 | 5.081681 | 7.694351 | 3.393619 | 7.412993 | 5.61761  | 1.582531 |
| TCGA-05-4403-01 | 5.973589 | 8.278441 | 2.590766 | 6.20254  | 5.86028  | 1.6243   |
| TCGA-05-4405-01 | 4.67371  | 8.070569 | 2.284124 | 8.301458 | 5.405795 | 2.102704 |
| TCGA-05-4415-01 | 3.421725 | 8.511951 | 5.865271 | 4.806004 | 3.199196 | 0.60764  |
| TCGA-05-4417-01 | 5.072637 | 8.30394  | 2.981466 | 9.340302 | 4.518511 | 2.402297 |
| TCGA-05-4418-01 | 4.046981 | 7.731776 | 4.107776 | 6.607448 | 3.383637 | 1.225725 |
| TCGA-05-4420-01 | 3.674046 | 7.926864 | 4.147502 | 6.564235 | 1.937894 | 0.858524 |
| TCGA-05-4422-01 | 3.985525 | 7.937267 | 3.813625 | 3.982833 | 1.07198  | 1.773107 |
| TCGA-05-4424-01 | 5.213257 | 8.341396 | 4.285372 | 6.76234  | 4.116915 | 3.407818 |
| TCGA-05-4425-01 | 5.254176 | 7.847576 | 3.627683 | 7.154269 | 5.705639 | 2.997711 |
| TCGA-05-4426-01 | 5.576512 | 8.091841 | 3.20891  | 7.342243 | 4.09406  | 1.8487   |
| TCGA-05-4427-01 | 4.266046 | 8.103514 | 3.679174 | 7.952699 | 3.12024  | 1.453321 |
| TCGA-05-4430-01 | 5.164345 | 8.097795 | 2.607847 | 8.414191 | 6.822289 | 2.163916 |
| TCGA-05-4432-01 | 4.672352 | 8.929061 | 3.673692 | 7.580698 | 2.996721 | 1.810186 |
| TCGA-05-4433-01 | 6.047946 | 8.954699 | 3.745555 | 3.333188 | 4.160197 | 1.785416 |
| TCGA-05-4434-01 | 4.688472 | 7.86313  | 4.880371 | 6.724893 | 4.742414 | 2.782943 |
| TCGA-05-5420-01 | 2.541186 | 7.996445 | 4.779144 | 6.863914 | 3.979623 | 1.261941 |
| TCGA-05-5423-01 | 4.265954 | 6.790838 | 4.138287 | 6.868028 | 5.546626 | 1.406519 |
| TCGA-05-5425-01 | 4.327377 | 8.39249  | 4.282726 | 6.588699 | 0.921036 | 1.795027 |
| TCGA-05-5428-01 | 2.600326 | 5.920994 | 5.048794 | 7.57712  | 6.422114 | 0.384131 |
| TCGA-05-5429-01 | 5.676822 | 8.06993  | 4.709888 | 7.345514 | 3.853354 | 0.382695 |
| TCGA-05-5715-01 | 5.748612 | 7.962158 | 2.347355 | 7.784674 | 5.618442 | 1.90685  |
| TCGA-35-3615-01 | 4.522286 | 7.307559 | 2.43523  | 6.065502 | 3.39333  | 1.076746 |
| TCGA-35-4122-01 | 5.275038 | 6.042149 | 4.545613 | 7.773763 | 4.424716 | 0.510497 |
| TCGA-35-4123-01 | 3.868689 | 6.951577 | 4.393049 | 7.344938 | 5.960787 | 1.421538 |
| TCGA-35-5375-01 | 4.256926 | 5.348746 | 4.037007 | 6.570733 | 3.85124  | 0.510058 |
| TCGA-38-4625-01 | 6.209487 | 7.739964 | 4.449157 | 6.469255 | 5.122945 | 1.186071 |
| TCGA-38-4626-01 | 5.610492 | 6.337453 | 2.44754  | 7.600502 | 6.582369 | 2.253963 |
| TCGA-38-4627-01 | 5.730995 | 7.588178 | 2.622919 | 10.17453 | 6.325863 | 1.964552 |
| TCGA-38-4628-01 | 2.983554 | 7.993111 | 3.503226 | 7.381028 | 5.397426 | 1.117279 |
| TCGA-38-4629-01 | 6.842192 | 7.631221 | 4.408564 | 8.394831 | 3.491379 | 0.895251 |
| TCGA-38-4630-01 | 6.589038 | 6.435538 | 4.713567 | 8.005943 | 0.52336  | 0.605766 |
| TCGA-38-4631-01 | 5.645174 | 7.568487 | 4.076325 | 5.085031 | 3.255427 | 0.456778 |
| TCGA-38-4632-01 | 3.529714 | 7.247578 | 6.077911 | 7.228921 | 4.997895 | 1.031353 |
| TCGA-38-6178-01 | 6.00017  | 7.147277 | 3.041412 | 7.670289 | 5.962635 | 2.262775 |
| TCGA-38-7271-01 | 5.232175 | 6.585766 | 2.169661 | 6.840161 | 6.764221 | 3.821046 |
| TCGA-38-A44F-01 | 5.459909 | 6.731351 | 1.874205 | 6.08191  | 6.593978 | 2.964313 |
| TCGA-44-2655-01 | 6.22753  | 7.424684 | 2.397248 | 5.738075 | 3.572149 | 1.761702 |
| TCGA-44-2656-01 | 4.037688 | 7.742769 | 3.328664 | 7.409256 | 6.013877 | 1.842526 |
| TCGA-44-2657-01 | 4.825199 | 5.755205 | 3.049043 | 5.908602 | 6.391559 | 3.158195 |
| TCGA-44-2659-01 | 4.230881 | 6.780161 | 2.321511 | 6.106136 | 4.542738 | 1.66268  |
| TCGA-44-2661-01 | 4.72858  | 5.677145 | 2.939365 | 6.213169 | 7.416063 | 2.091416 |
| TCGA-44-2662-01 | 6.234781 | 7.219832 | 4.920699 | 9.340069 | 0.520278 | 1.294712 |
| TCGA-44-2665-01 | 6.641688 | 8.620647 | 3.328907 | 9.043816 | 5.578296 | 1.802848 |

|                 |          |          |          |          |          |          |
|-----------------|----------|----------|----------|----------|----------|----------|
| TCGA-44-2666-01 | 4.71223  | 8.409639 | 2.957953 | 5.517773 | 7.2576   | 1.666226 |
| TCGA-44-2668-01 | 6.495787 | 7.059374 | 4.363457 | 9.01216  | 2.810601 | 1.061471 |
| TCGA-44-3396-01 | 6.314891 | 6.8234   | 3.6443   | 9.127274 | 5.900107 | 1.790195 |
| TCGA-44-3398-01 | 6.071015 | 6.838275 | 3.095825 | 8.670565 | 5.221628 | 1.759733 |
| TCGA-44-3917-01 | 3.029577 | 6.053379 | 3.530098 | 7.061782 | 0.776008 | 1.420845 |
| TCGA-44-3918-01 | 3.719397 | 6.592042 | 3.574043 | 7.997673 | 0.927131 | 0.495625 |
| TCGA-44-3919-01 | 6.081468 | 7.482338 | 3.478966 | 6.817304 | 7.564568 | 2.364736 |
| TCGA-44-4112-01 | 5.012551 | 8.198121 | 3.530665 | 7.700907 | 5.30397  | 1.053963 |
| TCGA-44-5643-01 | 4.13464  | 7.085028 | 3.959716 | 5.657436 | 3.952676 | 2.079018 |
| TCGA-44-5644-01 | 4.137213 | 8.199924 | 3.187749 | 5.637977 | 2.507382 | 4.248467 |
| TCGA-44-5645-01 | 4.49938  | 6.124997 | 1.875401 | 5.105151 | 1.945779 | 2.084568 |
| TCGA-44-6145-01 | 4.480803 | 8.529363 | 3.498723 | 8.234309 | 6.163603 | 2.04024  |
| TCGA-44-6146-01 | 6.025319 | 9.565438 | 1.61002  | 4.321664 | 1.956046 | 0.321896 |
| TCGA-44-6147-01 | 5.169216 | 7.066993 | 2.331513 | 7.704312 | 6.112798 | 2.841811 |
| TCGA-44-6148-01 | 5.19442  | 7.178414 | 1.050444 | 5.550541 | 7.900065 | 2.62083  |
| TCGA-44-6774-01 | 5.936251 | 7.327557 | 2.924497 | 9.048322 | 3.669512 | 1.899038 |
| TCGA-44-6775-01 | 4.82147  | 7.04143  | 3.416011 | 8.392796 | 1.971253 | 1.850799 |
| TCGA-44-6776-01 | 5.787947 | 9.19199  | 1.557966 | 5.580133 | 5.263044 | 1.55118  |
| TCGA-44-6777-01 | 4.901943 | 6.641571 | 2.870026 | 8.734681 | 5.67475  | 2.38029  |
| TCGA-44-6778-01 | 5.79856  | 6.023407 | 3.984692 | 6.059897 | 5.1751   | 3.140757 |
| TCGA-44-6779-01 | 6.24729  | 8.684281 | 4.942557 | 8.446339 | 4.957667 | 1.199045 |
| TCGA-44-7659-01 | 3.522029 | 7.331337 | 1.70091  | 4.500413 | 5.539412 | 1.842892 |
| TCGA-44-7660-01 | 3.464162 | 5.174102 | 3.450977 | 6.568613 | 0.079536 | 1.445566 |
| TCGA-44-7661-01 | 7.931165 | 8.101216 | 5.076464 | 8.491967 | 4.337745 | 2.546857 |
| TCGA-44-7662-01 | 4.211871 | 8.303978 | 4.330786 | 9.218639 | 5.28207  | 1.096111 |
| TCGA-44-7667-01 | 3.481703 | 6.545874 | 5.833081 | 7.34168  | 2.321919 | 0.503502 |
| TCGA-44-7669-01 | 4.887562 | 7.343685 | 5.367588 | 6.694522 | 4.546407 | 4.711102 |
| TCGA-44-7670-01 | 5.672246 | 6.871368 | 3.884777 | 5.714151 | 4.183158 | 3.531453 |
| TCGA-44-7671-01 | 5.884118 | 8.522917 | 2.772695 | 7.598559 | 4.661239 | 1.566584 |
| TCGA-44-7672-01 | 4.008692 | 7.872219 | 3.71628  | 8.278829 | 5.870475 | 2.356691 |
| TCGA-44-8117-01 | 4.046698 | 7.655479 | 2.740881 | 8.230938 | 4.312671 | 1.206224 |
| TCGA-44-8119-01 | 4.786086 | 8.264772 | 3.630795 | 9.456185 | 2.883373 | 1.089024 |
| TCGA-44-8120-01 | 5.047488 | 7.512555 | 2.330201 | 7.941146 | 5.074197 | 2.167492 |
| TCGA-44-A479-01 | 3.624398 | 7.530257 | 3.292391 | 8.298486 | 2.052364 | 2.358469 |
| TCGA-44-A47A-01 | 4.042684 | 6.724565 | 3.583339 | 6.863912 | 5.520063 | 1.7885   |
| TCGA-44-A47B-01 | 3.993391 | 8.784447 | 2.412636 | 6.981708 | 5.944013 | 0.992624 |
| TCGA-44-A47G-01 | 5.877316 | 7.633025 | 3.212133 | 7.660447 | 5.885028 | 2.200072 |
| TCGA-44-A4SS-01 | 5.964395 | 7.679306 | 3.270883 | 7.55939  | 3.802533 | 1.34994  |
| TCGA-44-A4SU-01 | 5.081686 | 7.171795 | 2.578413 | 5.007732 | 4.427335 | 2.332052 |
| TCGA-49-4486-01 | 2.934312 | 6.240362 | 2.316238 | 2.761555 | 1.45819  | 0.447901 |
| TCGA-49-4487-01 | 4.245378 | 6.846466 | 5.010934 | 7.639385 | 3.179527 | 2.421231 |
| TCGA-49-4488-01 | 3.161214 | 6.707751 | 3.745584 | 6.722926 | 3.767301 | 1.16844  |
| TCGA-49-4490-01 | 5.994575 | 7.836037 | 2.930752 | 5.82671  | 4.362654 | 1.878669 |
| TCGA-49-4494-01 | 6.805141 | 7.264118 | 3.8036   | 6.963117 | 4.866293 | 0.75455  |
| TCGA-49-4501-01 | 4.493793 | 7.463275 | 2.726424 | 6.161171 | 6.295328 | 2.098558 |
| TCGA-49-4505-01 | 4.56436  | 6.373498 | 1.868654 | 6.994199 | 8.086532 | 1.648235 |
| TCGA-49-4506-01 | 2.645281 | 6.665524 | 4.695922 | 7.299721 | 1.457961 | 0.647213 |
| TCGA-49-4507-01 | 3.35016  | 7.144422 | 3.915374 | 5.951822 | 6.124711 | 0.626857 |
| TCGA-49-4510-01 | 3.600269 | 6.406553 | 1.310762 | 6.251093 | 3.436077 | 1.297558 |
| TCGA-49-4512-01 | 3.898224 | 6.175805 | 2.687258 | 7.273054 | 6.128634 | 1.491255 |
| TCGA-49-4514-01 | 3.167597 | 7.395753 | 2.818174 | 3.909969 | 3.746344 | 1.105548 |
| TCGA-49-6742-01 | 4.362731 | 9.230353 | 4.526518 | 5.137001 | 5.095195 | 1.061024 |
| TCGA-49-6743-01 | 4.968627 | 8.703048 | 4.108706 | 8.632382 | 4.967762 | 1.395587 |
| TCGA-49-6744-01 | 5.285262 | 7.430018 | 3.116722 | 8.108898 | 6.875044 | 2.155324 |
| TCGA-49-6745-01 | 7.000358 | 8.754577 | 4.2213   | 7.783054 | 5.313188 | 1.709343 |

|                 |          |          |          |          |          |          |
|-----------------|----------|----------|----------|----------|----------|----------|
| TCGA-49-6761-01 | 4.426083 | 7.159967 | 2.847611 | 7.762519 | 4.061794 | 1.33805  |
| TCGA-49-6767-01 | 7.288486 | 7.465128 | 4.855593 | 6.006732 | 0.89232  | 1.397876 |
| TCGA-49-AAQV-01 | 3.318551 | 7.482842 | 3.932089 | 5.230909 | 4.62363  | 1.789257 |
| TCGA-49-AAR0-01 | 5.000193 | 6.602973 | 3.432847 | 5.395979 | 5.094642 | 3.524615 |
| TCGA-49-AAR2-01 | 2.565414 | 6.266722 | 1.953272 | 4.175936 | 1.441466 | 1.062274 |
| TCGA-49-AAR3-01 | 5.4333   | 7.251886 | 3.793338 | 7.598547 | 4.161896 | 1.854592 |
| TCGA-49-AAR4-01 | 4.552068 | 7.210015 | 3.090463 | 6.972317 | 6.261874 | 2.232822 |
| TCGA-49-AAR9-01 | 3.258132 | 9.269904 | 4.426501 | 8.777177 | 1.140748 | 0.351094 |
| TCGA-49-AARE-01 | 4.375297 | 8.662282 | 3.12495  | 6.428343 | 4.240992 | 1.269685 |
| TCGA-49-AARN-01 | 5.562539 | 7.772089 | 2.82919  | 6.665948 | 4.844078 | 3.21495  |
| TCGA-49-AARO-01 | 5.873988 | 7.819463 | 2.892982 | 7.719809 | 3.718759 | 2.520332 |
| TCGA-49-AARQ-01 | 1.724528 | 6.272538 | 2.101993 | 3.991911 | 3.737243 | 0.8864   |
| TCGA-49-AARR-01 | 5.498735 | 7.19345  | 1.373887 | 5.281591 | 6.009069 | 2.897012 |
| TCGA-4B-A93V-01 | 3.694563 | 9.120204 | 2.803755 | 6.241818 | 0.740469 | 0.999569 |
| TCGA-50-5044-01 | 6.350862 | 7.140143 | 3.743669 | 6.860798 | 5.506392 | 1.954873 |
| TCGA-50-5045-01 | 5.260052 | 6.54981  | 3.474836 | 8.578179 | 5.376222 | 2.179797 |
| TCGA-50-5049-01 | 3.95449  | 7.320984 | 3.157396 | 7.981499 | 3.241357 | 2.135109 |
| TCGA-50-5051-01 | 4.393682 | 7.236988 | 4.071098 | 5.642334 | 1.101639 | 1.333883 |
| TCGA-50-5055-01 | 5.111095 | 7.052186 | 2.853073 | 7.618327 | 5.684253 | 3.266523 |
| TCGA-50-5066-01 | 4.414494 | 6.4525   | 4.726329 | 7.871265 | 3.526706 | 0.687025 |
| TCGA-50-5068-01 | 3.748854 | 6.044718 | 4.331898 | 6.811082 | 5.264991 | 0.993394 |
| TCGA-50-5072-01 | 4.90547  | 8.949467 | 6.011566 | 8.007569 | 4.223789 | 2.732452 |
| TCGA-50-5930-01 | 4.896159 | 9.266998 | 3.003608 | 8.886416 | 3.652723 | 1.346103 |
| TCGA-50-5931-01 | 4.368738 | 5.986717 | 4.70665  | 8.359009 | 2.901608 | 1.433388 |
| TCGA-50-5932-01 | 3.999228 | 8.26234  | 3.574764 | 3.924153 | 2.38863  | 1.291529 |
| TCGA-50-5933-01 | 6.784359 | 7.192671 | 4.845976 | 8.554826 | 4.303621 | 1.185638 |
| TCGA-50-5935-01 | 5.368327 | 7.212595 | 2.481081 | 6.653175 | 4.339994 | 2.267958 |
| TCGA-50-5936-01 | 5.465454 | 8.725518 | 4.074857 | 8.585902 | 4.768785 | 1.312562 |
| TCGA-50-5939-01 | 6.031971 | 7.565732 | 3.488652 | 7.704257 | 4.701068 | 1.985618 |
| TCGA-50-5941-01 | 5.787157 | 7.252823 | 3.661729 | 7.513968 | 5.666812 | 2.496421 |
| TCGA-50-5942-01 | 6.267691 | 7.181691 | 1.23129  | 5.613648 | 6.867757 | 2.053795 |
| TCGA-50-5944-01 | 5.513053 | 6.135246 | 2.24334  | 6.127855 | 5.718837 | 3.060098 |
| TCGA-50-5946-01 | 3.287366 | 8.411257 | 4.803684 | 6.232099 | 3.322334 | 0.700077 |
| TCGA-50-6590-01 | 6.877475 | 7.173375 | 5.229627 | 7.432353 | 3.09577  | 2.97831  |
| TCGA-50-6591-01 | 7.195935 | 7.496501 | 4.779491 | 8.056386 | 1.664764 | 0.659068 |
| TCGA-50-6592-01 | 5.704344 | 8.954942 | 3.876418 | 8.683608 | 4.684754 | 1.288813 |
| TCGA-50-6593-01 | 5.926279 | 7.688514 | 3.5915   | 7.65608  | 5.831234 | 1.704874 |
| TCGA-50-6594-01 | 4.994399 | 8.235519 | 4.255251 | 7.857056 | 1.46892  | 0.351249 |
| TCGA-50-6595-01 | 7.239578 | 8.62931  | 4.860029 | 9.684398 | 4.484797 | 1.419704 |
| TCGA-50-6597-01 | 3.535981 | 6.758438 | 2.022424 | 3.484517 | 4.043068 | 2.341514 |
| TCGA-50-6673-01 | 4.524511 | 7.396947 | 3.663376 | 7.733993 | 4.708134 | 2.042877 |
| TCGA-50-7109-01 | 4.371026 | 8.252532 | 3.649303 | 7.555415 | 2.793422 | 1.545806 |
| TCGA-50-8457-01 | 4.556369 | 6.892576 | 1.111457 | 5.751509 | 6.318719 | 2.64248  |
| TCGA-50-8459-01 | 5.814685 | 6.549026 | 2.364312 | 10.07525 | 5.781356 | 2.54145  |
| TCGA-50-8460-01 | 4.515837 | 5.728185 | 2.361999 | 5.094628 | 6.979251 | 2.406288 |
| TCGA-53-7624-01 | 2.271239 | 6.726173 | 5.141375 | 6.306483 | 1.040738 | 0.725829 |
| TCGA-53-7626-01 | 6.552886 | 7.054265 | 2.631508 | 4.704042 | 0.735694 | 3.113404 |
| TCGA-53-7813-01 | 2.68514  | 7.823129 | 3.200363 | 7.035463 | 2.107345 | 1.541119 |
| TCGA-53-A4EZ-01 | 2.176576 | 6.853227 | 3.079143 | 4.467966 | 2.023482 | 2.546223 |
| TCGA-55-1592-01 | 4.725622 | 7.843978 | 3.336843 | 6.68084  | 4.874285 | 1.553728 |
| TCGA-55-1594-01 | 4.569693 | 8.526957 | 4.286636 | 6.863823 | 1.952179 | 1.124529 |
| TCGA-55-1596-01 | 3.401956 | 9.286509 | 4.924153 | 6.299434 | 4.068728 | 1.06003  |
| TCGA-55-5899-01 | 4.205296 | 7.635888 | 4.786364 | 7.606783 | 0.265371 | 4.382987 |
| TCGA-55-6543-01 | 5.56255  | 7.221909 | 1.688427 | 6.407283 | 5.645656 | 1.317769 |
| TCGA-55-6642-01 | 4.860236 | 7.067141 | 3.292062 | 8.272336 | 3.944582 | 2.018925 |

|                 |          |          |          |          |          |          |
|-----------------|----------|----------|----------|----------|----------|----------|
| TCGA-55-6712-01 | 6.553175 | 8.190675 | 4.269447 | 7.340597 | 7.122549 | 1.757547 |
| TCGA-55-6968-01 | 4.827668 | 6.936919 | 4.697229 | 6.316459 | 1.068517 | 4.216546 |
| TCGA-55-6970-01 | 4.546197 | 8.196106 | 4.839997 | 6.376479 | 4.654181 | 2.633692 |
| TCGA-55-6971-01 | 5.43693  | 7.383752 | 3.664193 | 6.345825 | 4.134671 | 2.937959 |
| TCGA-55-6972-01 | 3.042899 | 6.433599 | 3.714344 | 1.984074 | 0.097443 | 0.687121 |
| TCGA-55-6975-01 | 5.557489 | 8.152396 | 4.608108 | 9.091898 | 4.725922 | 1.995935 |
| TCGA-55-6978-01 | 6.873282 | 8.125053 | 4.145161 | 9.520705 | 5.483129 | 1.694184 |
| TCGA-55-6979-01 | 4.944835 | 8.014358 | 4.226503 | 8.003329 | 2.653351 | 2.808817 |
| TCGA-55-6980-01 | 4.890453 | 7.504147 | 1.665232 | 7.671113 | 5.600455 | 2.515302 |
| TCGA-55-6981-01 | 5.720564 | 8.278161 | 3.357295 | 7.269481 | 5.046481 | 1.609329 |
| TCGA-55-6982-01 | 6.075963 | 8.892621 | 4.195879 | 7.804583 | 3.653917 | 1.599798 |
| TCGA-55-6983-01 | 4.563134 | 8.16565  | 1.866505 | 6.239488 | 4.764931 | 3.545688 |
| TCGA-55-6984-01 | 6.040293 | 9.680901 | 3.482573 | 5.337976 | 3.697744 | 1.459384 |
| TCGA-55-6985-01 | 5.211673 | 7.920216 | 3.452326 | 6.552242 | 5.512229 | 3.241499 |
| TCGA-55-6986-01 | 6.074017 | 8.134569 | 2.540546 | 5.140706 | 4.290859 | 2.671245 |
| TCGA-55-6987-01 | 4.299807 | 6.691272 | 3.4099   | 6.299498 | 5.847083 | 2.655394 |
| TCGA-55-7227-01 | 6.545864 | 7.540868 | 3.604391 | 8.074685 | 4.851934 | 1.917549 |
| TCGA-55-7281-01 | 5.913272 | 7.349177 | 2.484306 | 6.758124 | 3.90859  | 1.254539 |
| TCGA-55-7283-01 | 4.521679 | 7.870687 | 3.666754 | 3.890688 | 5.798848 | 1.978841 |
| TCGA-55-7284-01 | 6.227971 | 8.607881 | 2.197123 | 6.129015 | 4.359106 | 2.400891 |
| TCGA-55-7570-01 | 3.893756 | 5.555212 | 4.636224 | 7.27145  | 3.689111 | 1.03672  |
| TCGA-55-7573-01 | 5.612742 | 6.850622 | 2.117503 | 6.344883 | 5.808112 | 3.028128 |
| TCGA-55-7574-01 | 5.223813 | 6.936562 | 2.86628  | 8.875219 | 1.575695 | 3.086439 |
| TCGA-55-7576-01 | 3.915891 | 8.218004 | 3.835527 | 7.083144 | 4.348688 | 1.362312 |
| TCGA-55-7724-01 | 5.845159 | 5.564999 | 3.238701 | 7.108401 | 3.592775 | 1.884906 |
| TCGA-55-7725-01 | 4.159303 | 7.00392  | 2.498326 | 3.650951 | 5.413243 | 1.872041 |
| TCGA-55-7726-01 | 6.9125   | 6.292918 | 4.601881 | 10.10933 | 3.799814 | 2.509113 |
| TCGA-55-7727-01 | 4.976794 | 8.730976 | 4.622827 | 6.556947 | 4.020398 | 1.67491  |
| TCGA-55-7728-01 | 4.344209 | 7.257362 | 1.997621 | 3.511089 | 4.878351 | 2.373974 |
| TCGA-55-7815-01 | 5.273599 | 8.66178  | 3.952038 | 8.286871 | 2.415005 | 1.279548 |
| TCGA-55-7816-01 | 5.369221 | 7.311697 | 2.317655 | 7.661188 | 3.990793 | 2.564412 |
| TCGA-55-7903-01 | 3.959754 | 6.816958 | 3.953655 | 4.896535 | 4.937055 | 1.208903 |
| TCGA-55-7907-01 | 4.623169 | 8.108438 | 2.865046 | 6.402061 | 3.901292 | 1.241135 |
| TCGA-55-7910-01 | 4.00061  | 7.670045 | 3.895375 | 5.56629  | 2.349851 | 6.159446 |
| TCGA-55-7911-01 | 4.303088 | 6.724901 | 4.853808 | 6.891238 | 4.783173 | 1.811748 |
| TCGA-55-7913-01 | 2.560539 | 8.603549 | 4.365721 | 5.796709 | 0.673071 | 0.628192 |
| TCGA-55-7914-01 | 5.468714 | 5.362104 | 2.599197 | 7.709494 | 5.114595 | 2.115895 |
| TCGA-55-7994-01 | 6.489302 | 7.432425 | 5.488925 | 5.958997 | 3.440581 | 2.088075 |
| TCGA-55-7995-01 | 3.803995 | 8.152335 | 3.754401 | 6.278889 | 3.614118 | 2.14379  |
| TCGA-55-8085-01 | 4.083733 | 6.104419 | 3.906379 | 6.533592 | 1.197944 | 1.531317 |
| TCGA-55-8087-01 | 6.056553 | 8.773989 | 1.460581 | 5.768828 | 6.10742  | 4.027299 |
| TCGA-55-8089-01 | 6.65174  | 7.466975 | 4.905541 | 8.277239 | 3.715243 | 1.871015 |
| TCGA-55-8090-01 | 6.277575 | 7.983138 | 3.497806 | 7.385222 | 4.085682 | 1.601461 |
| TCGA-55-8091-01 | 5.617337 | 7.691384 | 2.87963  | 8.054277 | 5.84721  | 2.154066 |
| TCGA-55-8092-01 | 3.771559 | 8.041465 | 3.600282 | 6.389622 | 1.442696 | 2.042783 |
| TCGA-55-8094-01 | 4.714411 | 9.100597 | 4.285341 | 3.474362 | 0.868998 | 0.43885  |
| TCGA-55-8096-01 | 5.265447 | 7.152834 | 2.538963 | 7.494662 | 3.429816 | 1.654567 |
| TCGA-55-8097-01 | 4.469976 | 7.646057 | 1.766346 | 6.097582 | 6.987008 | 2.760471 |
| TCGA-55-8203-01 | 5.080964 | 8.140598 | 3.831486 | 7.654871 | 3.180746 | 2.456355 |
| TCGA-55-8204-01 | 4.698244 | 6.466407 | 2.91327  | 7.641367 | 5.10062  | 1.742941 |
| TCGA-55-8205-01 | 7.787444 | 7.774028 | 5.620504 | 7.853728 | 4.251092 | 2.42514  |
| TCGA-55-8206-01 | 5.86227  | 6.743867 | 2.123161 | 5.967035 | 6.739634 | 2.63587  |
| TCGA-55-8207-01 | 5.34434  | 6.071527 | 1.66922  | 6.962364 | 6.507184 | 1.64273  |
| TCGA-55-8208-01 | 4.957384 | 6.950887 | 2.656734 | 8.243455 | 3.926118 | 2.759195 |
| TCGA-55-8299-01 | 6.591336 | 7.306263 | 4.563782 | 8.410159 | 5.945746 | 2.213817 |

|                 |          |          |          |          |          |          |
|-----------------|----------|----------|----------|----------|----------|----------|
| TCGA-55-8301-01 | 4.461261 | 6.943083 | 4.557053 | 6.815988 | 4.755736 | 2.346398 |
| TCGA-55-8302-01 | 4.496026 | 8.475962 | 2.796141 | 6.86773  | 6.028989 | 1.628012 |
| TCGA-55-8505-01 | 4.85238  | 7.904835 | 2.982085 | 8.082705 | 4.652721 | 1.136004 |
| TCGA-55-8506-01 | 5.670582 | 8.348595 | 0.990963 | 7.01613  | 6.867838 | 1.715976 |
| TCGA-55-8507-01 | 4.810517 | 7.130376 | 2.344428 | 6.100525 | 5.403748 | 1.393032 |
| TCGA-55-8508-01 | 4.334732 | 7.274675 | 2.966726 | 6.750394 | 3.658483 | 2.532204 |
| TCGA-55-8510-01 | 4.528812 | 7.283777 | 3.109479 | 7.161896 | 6.364486 | 2.18864  |
| TCGA-55-8511-01 | 3.562966 | 8.29668  | 3.434708 | 8.500115 | 3.97373  | 2.663441 |
| TCGA-55-8512-01 | 4.791174 | 6.796659 | 1.295359 | 3.945054 | 4.435476 | 2.478799 |
| TCGA-55-8513-01 | 5.388606 | 7.985933 | 1.847247 | 4.57398  | 4.377911 | 3.049957 |
| TCGA-55-8514-01 | 3.715007 | 7.904566 | 1.068316 | 4.133697 | 3.621512 | 1.0938   |
| TCGA-55-8614-01 | 5.332684 | 5.580389 | 2.274691 | 7.987749 | 6.123946 | 2.072417 |
| TCGA-55-8615-01 | 3.775411 | 8.776852 | 2.517655 | 5.852057 | 2.084897 | 1.206295 |
| TCGA-55-8616-01 | 2.798877 | 8.415022 | 1.690252 | 5.583628 | 5.887217 | 2.015462 |
| TCGA-55-8619-01 | 5.432455 | 8.361007 | 2.192488 | 5.521314 | 6.736647 | 3.06512  |
| TCGA-55-8620-01 | 2.752384 | 8.796937 | 4.209059 | 5.707882 | 3.461469 | 5.099168 |
| TCGA-55-8621-01 | 5.478129 | 6.426596 | 2.815401 | 6.381873 | 6.825173 | 3.095914 |
| TCGA-55-A48X-01 | 4.840814 | 6.934699 | 3.404352 | 6.121339 | 6.120611 | 3.334084 |
| TCGA-55-A48Y-01 | 4.948235 | 8.155794 | 2.498899 | 8.666283 | 3.784403 | 1.426843 |
| TCGA-55-A48Z-01 | 4.537063 | 7.802967 | 3.640509 | 6.946183 | 5.447667 | 1.958668 |
| TCGA-55-A490-01 | 3.728313 | 7.581018 | 2.179705 | 6.591741 | 2.522136 | 1.116562 |
| TCGA-55-A491-01 | 3.595373 | 7.737972 | 2.365541 | 6.154733 | 4.392679 | 1.71858  |
| TCGA-55-A492-01 | 4.780094 | 6.826973 | 1.161739 | 4.296086 | 4.303378 | 1.390412 |
| TCGA-55-A493-01 | 6.337641 | 7.624282 | 5.651378 | 7.776595 | 3.653141 | 2.977803 |
| TCGA-55-A494-01 | 4.263473 | 9.187214 | 3.399336 | 5.751861 | 0.614056 | 1.936137 |
| TCGA-55-A4DF-01 | 5.377183 | 7.574281 | 4.250637 | 7.270903 | 4.178286 | 1.713266 |
| TCGA-55-A4DG-01 | 2.692121 | 6.942543 | 2.148497 | 5.481845 | 4.230219 | 2.328227 |
| TCGA-55-A57B-01 | 6.273198 | 6.425328 | 2.702515 | 7.133234 | 4.816931 | 2.518526 |
| TCGA-62-8394-01 | 5.086437 | 7.437855 | 4.075927 | 5.664826 | 4.161784 | 2.287147 |
| TCGA-62-8395-01 | 4.960702 | 6.128819 | 2.196719 | 7.840014 | 4.975054 | 2.853132 |
| TCGA-62-8397-01 | 2.753504 | 5.855421 | 1.722937 | 5.214043 | 5.792938 | 2.192811 |
| TCGA-62-8398-01 | 5.469748 | 7.825117 | 4.262709 | 8.215865 | 3.062597 | 1.475264 |
| TCGA-62-8399-01 | 4.304869 | 6.896614 | 3.081976 | 6.214087 | 6.151989 | 2.166224 |
| TCGA-62-8402-01 | 4.703988 | 9.463687 | 2.733364 | 5.725383 | 1.222102 | 1.189071 |
| TCGA-62-A46O-01 | 3.526614 | 8.809885 | 5.176577 | 4.914608 | 1.446912 | 0.520537 |
| TCGA-62-A46P-01 | 3.916585 | 8.75364  | 2.114539 | 6.411339 | 3.86958  | 3.305003 |
| TCGA-62-A46R-01 | 3.015991 | 7.424719 | 3.424002 | 7.220665 | 5.754831 | 1.489657 |
| TCGA-62-A46S-01 | 4.071526 | 9.543362 | 2.176964 | 5.183695 | 3.766334 | 1.826156 |
| TCGA-62-A46V-01 | 3.207475 | 6.167352 | 3.628926 | 6.474093 | 6.094228 | 1.470985 |
| TCGA-62-A46Y-01 | 5.279405 | 7.488077 | 3.800584 | 4.726365 | 5.045762 | 1.909471 |
| TCGA-62-A470-01 | 3.770117 | 7.651073 | 2.85762  | 4.743758 | 3.57656  | 1.583695 |
| TCGA-62-A471-01 | 3.253116 | 9.40017  | 3.661924 | 5.476986 | 4.214298 | 1.376573 |
| TCGA-62-A472-01 | 4.737877 | 7.888886 | 4.805724 | 7.241009 | 4.588072 | 2.016098 |
| TCGA-64-1676-01 | 2.401244 | 6.668525 | 3.963184 | 7.412126 | 5.307187 | 0.575663 |
| TCGA-64-1677-01 | 3.6625   | 6.750499 | 3.063412 | 5.527781 | 3.542713 | 1.161171 |
| TCGA-64-1678-01 | 2.958211 | 5.577364 | 6.182248 | 6.14591  | 0.652077 | 0.255823 |
| TCGA-64-1679-01 | 4.6536   | 7.610041 | 4.219049 | 8.73481  | 5.31031  | 1.849468 |
| TCGA-64-1680-01 | 6.583648 | 6.929405 | 3.241627 | 3.917824 | 6.083839 | 0.71868  |
| TCGA-64-1681-01 | 5.262672 | 6.6067   | 2.394637 | 6.060157 | 4.919465 | 1.575644 |
| TCGA-64-5774-01 | 5.424297 | 7.464675 | 4.677574 | 8.095288 | 1.208729 | 0.948772 |
| TCGA-64-5775-01 | 7.799246 | 6.757692 | 5.478982 | 8.724037 | 1.18789  | 0.550883 |
| TCGA-64-5778-01 | 4.360492 | 8.167296 | 3.948364 | 4.911524 | 1.920904 | 1.390635 |
| TCGA-64-5779-01 | 4.831208 | 6.236622 | 2.456747 | 7.716754 | 3.058916 | 2.205946 |
| TCGA-64-5781-01 | 4.571881 | 8.04124  | 3.838063 | 7.197969 | 0.493317 | 1.963545 |
| TCGA-64-5815-01 | 6.998694 | 7.603081 | 4.173931 | 8.980171 | 5.462549 | 1.430735 |

|                 |          |          |          |          |          |          |
|-----------------|----------|----------|----------|----------|----------|----------|
| TCGA-67-3770-01 | 4.735174 | 6.564002 | 3.645116 | 5.477109 | 4.287053 | 0.660646 |
| TCGA-67-3771-01 | 4.965607 | 6.317402 | 3.475174 | 6.795958 | 3.279575 | 1.480454 |
| TCGA-67-3772-01 | 5.898909 | 7.148652 | 2.847242 | 7.216201 | 5.92978  | 0.973052 |
| TCGA-67-3773-01 | 4.431713 | 4.628548 | 2.028876 | 5.6225   | 7.625094 | 1.252248 |
| TCGA-67-3774-01 | 4.137153 | 7.542977 | 2.446796 | 6.92319  | 3.717735 | 1.950108 |
| TCGA-67-4679-01 | 4.22643  | 6.143635 | 1.75007  | 7.413714 | 7.269719 | 2.190442 |
| TCGA-67-6215-01 | 4.20436  | 8.260253 | 3.95136  | 4.645068 | 4.883443 | 1.613617 |
| TCGA-67-6216-01 | 6.588594 | 8.212823 | 2.776728 | 5.690363 | 6.338018 | 1.986679 |
| TCGA-67-6217-01 | 6.234591 | 6.581403 | 1.720194 | 4.099878 | 4.300114 | 1.979615 |
| TCGA-69-7760-01 | 5.377115 | 6.127443 | 3.484429 | 5.986572 | 2.880257 | 0.306136 |
| TCGA-69-7761-01 | 5.546728 | 8.091305 | 4.075239 | 7.064021 | 4.754132 | 1.993108 |
| TCGA-69-7763-01 | 5.841752 | 6.810828 | 2.259164 | 8.482076 | 4.709821 | 2.884456 |
| TCGA-69-7764-01 | 4.153231 | 8.046752 | 2.938287 | 5.346744 | 2.96402  | 1.239479 |
| TCGA-69-7765-01 | 4.895433 | 7.955885 | 2.737369 | 8.036878 | 3.93738  | 2.197749 |
| TCGA-69-7973-01 | 5.468994 | 8.043985 | 4.974917 | 8.40492  | 0.519899 | 1.865373 |
| TCGA-69-7974-01 | 5.069794 | 8.533403 | 3.950212 | 7.133058 | 4.396297 | 1.785402 |
| TCGA-69-7978-01 | 6.340069 | 7.762496 | 3.807953 | 8.308592 | 5.877373 | 2.044534 |
| TCGA-69-7979-01 | 5.319594 | 7.152111 | 2.134539 | 6.690029 | 3.151922 | 4.374459 |
| TCGA-69-7980-01 | 3.775726 | 8.169574 | 2.584532 | 7.078236 | 0.386743 | 1.650395 |
| TCGA-69-8253-01 | 4.541591 | 7.805401 | 2.12909  | 5.424159 | 4.873038 | 1.402625 |
| TCGA-69-8254-01 | 5.689275 | 8.89889  | 2.577735 | 4.768635 | 4.959582 | 1.747222 |
| TCGA-69-8255-01 | 2.739724 | 6.662697 | 4.453936 | 5.242788 | 2.813717 | 1.341703 |
| TCGA-69-8453-01 | 5.872015 | 6.667298 | 2.948823 | 5.50237  | 7.104232 | 2.185253 |
| TCGA-69-A59K-01 | 4.189702 | 4.305926 | 4.293554 | 7.346802 | 3.30827  | 2.059271 |
| TCGA-71-6725-01 | 4.924349 | 8.127731 | 2.230969 | 4.547549 | 2.623754 | 1.093554 |
| TCGA-71-8520-01 | 6.184894 | 8.467297 | 3.52974  | 8.875962 | 3.759274 | 1.27704  |
| TCGA-73-4658-01 | 5.012296 | 7.577136 | 2.915161 | 8.465362 | 4.978775 | 1.594007 |
| TCGA-73-4659-01 | 4.703775 | 7.632315 | 4.502419 | 6.740488 | 5.420023 | 1.848716 |
| TCGA-73-4662-01 | 3.52661  | 7.157892 | 2.769612 | 7.093138 | 4.733302 | 2.107831 |
| TCGA-73-4666-01 | 5.833149 | 8.449384 | 5.516781 | 6.460679 | 3.631483 | 0.929737 |
| TCGA-73-4668-01 | 5.046624 | 7.360317 | 3.340832 | 7.461254 | 6.464406 | 1.45259  |
| TCGA-73-4670-01 | 3.854552 | 7.901115 | 4.539965 | 8.813225 | 1.420141 | 1.216116 |
| TCGA-73-4675-01 | 3.984802 | 9.257127 | 2.70644  | 6.918482 | 4.80151  | 1.332803 |
| TCGA-73-4676-01 | 7.005458 | 8.044669 | 4.571407 | 6.84178  | 5.257082 | 0.849138 |
| TCGA-73-4677-01 | 5.368202 | 8.087243 | 1.941767 | 5.731831 | 3.778788 | 1.543676 |
| TCGA-73-7498-01 | 5.331349 | 6.687483 | 1.704428 | 5.191831 | 6.558587 | 2.798133 |
| TCGA-73-7499-01 | 3.515269 | 6.090858 | 5.0744   | 6.931574 | 4.992003 | 1.491242 |
| TCGA-73-A9RS-01 | 3.071387 | 8.08783  | 4.076625 | 7.527909 | 4.756779 | 1.053995 |
| TCGA-75-5125-01 | 5.533903 | 8.033288 | 5.317066 | 8.253369 | 4.512179 | 1.690099 |
| TCGA-75-5146-01 | 3.846904 | 7.543508 | 2.140174 | 5.322371 | 4.241504 | 2.058108 |
| TCGA-75-5147-01 | 4.061647 | 7.674927 | 5.789596 | 7.253191 | 5.02037  | 1.737796 |
| TCGA-75-6206-01 | 4.672008 | 7.210747 | 1.349559 | 6.678314 | 4.264627 | 1.790802 |
| TCGA-75-6212-01 | 5.697126 | 5.146842 | 2.50363  | 6.105605 | 7.564598 | 2.283452 |
| TCGA-75-6214-01 | 6.942463 | 7.517115 | 4.411835 | 5.862439 | 2.184994 | 1.134879 |
| TCGA-75-7025-01 | 5.874284 | 6.551651 | 1.498848 | 6.34606  | 5.677685 | 3.419877 |
| TCGA-75-7027-01 | 6.185697 | 7.949967 | 4.547742 | 9.71839  | 0.510047 | 1.015545 |
| TCGA-78-7143-01 | 5.086009 | 8.368154 | 4.731404 | 4.246273 | 4.506268 | 2.50474  |
| TCGA-78-7145-01 | 5.069634 | 6.995225 | 5.238304 | 7.879623 | 5.964443 | 1.342598 |
| TCGA-78-7146-01 | 6.350495 | 8.288669 | 5.263884 | 7.64111  | 2.351539 | 0.755319 |
| TCGA-78-7147-01 | 3.297954 | 7.439157 | 4.066109 | 2.530491 | 5.351382 | 1.210538 |
| TCGA-78-7148-01 | 4.566384 | 9.478191 | 4.11502  | 6.700651 | 3.356749 | 1.363537 |
| TCGA-78-7149-01 | 5.190084 | 6.363726 | 1.623402 | 4.682666 | 4.562836 | 2.059379 |
| TCGA-78-7150-01 | 4.299296 | 9.101988 | 5.087923 | 8.54871  | 3.691106 | 0.424092 |
| TCGA-78-7152-01 | 4.353677 | 8.294304 | 2.518514 | 5.948642 | 3.409393 | 2.111259 |
| TCGA-78-7153-01 | 3.343211 | 7.983073 | 3.029413 | 4.908982 | 3.611216 | 1.296735 |

|                 |          |          |          |          |          |          |
|-----------------|----------|----------|----------|----------|----------|----------|
| TCGA-78-7154-01 | 4.425698 | 5.324212 | 4.778048 | 7.505133 | 3.874519 | 1.230949 |
| TCGA-78-7155-01 | 6.860608 | 8.166228 | 3.870563 | 5.207673 | 1.824348 | 0.338172 |
| TCGA-78-7156-01 | 5.42647  | 6.708583 | 1.939371 | 3.443213 | 4.063296 | 1.722926 |
| TCGA-78-7158-01 | 7.07625  | 5.901656 | 3.26832  | 6.689192 | 3.725416 | 1.259291 |
| TCGA-78-7159-01 | 5.136204 | 8.77581  | 3.71342  | 7.563355 | 1.605952 | 1.376995 |
| TCGA-78-7160-01 | 5.203965 | 8.729755 | 3.86659  | 7.697905 | 3.361611 | 2.235466 |
| TCGA-78-7161-01 | 4.699818 | 8.098861 | 1.760265 | 7.376378 | 2.438719 | 1.527912 |
| TCGA-78-7162-01 | 5.962701 | 7.523714 | 2.167157 | 5.356358 | 6.03937  | 2.961768 |
| TCGA-78-7163-01 | 5.404647 | 7.808243 | 1.552154 | 1.876311 | 2.783401 | 3.394828 |
| TCGA-78-7166-01 | 3.126618 | 8.261346 | 3.409466 | 5.049513 | 4.033041 | 0.950681 |
| TCGA-78-7167-01 | 5.205076 | 8.666063 | 0.765638 | 6.671574 | 3.203049 | 1.516326 |
| TCGA-78-7220-01 | 5.114797 | 9.889117 | 3.950868 | 5.410376 | 2.830407 | 0.747596 |
| TCGA-78-7535-01 | 4.645726 | 7.708391 | 3.034434 | 4.964647 | 3.008087 | 1.87119  |
| TCGA-78-7536-01 | 3.988142 | 9.08065  | 6.042115 | 6.481284 | 0.928063 | 0.696258 |
| TCGA-78-7537-01 | 4.93729  | 8.953526 | 1.308282 | 7.331694 | 5.365251 | 2.018077 |
| TCGA-78-7539-01 | 2.866637 | 7.569581 | 2.141767 | 4.789808 | 3.631509 | 1.464186 |
| TCGA-78-7540-01 | 6.146741 | 8.89738  | 1.801832 | 4.062454 | 2.749018 | 1.163994 |
| TCGA-78-7542-01 | 6.767903 | 8.969657 | 5.390958 | 5.586583 | 2.643676 | 0.98076  |
| TCGA-78-7633-01 | 5.5317   | 6.495366 | 2.620582 | 5.20674  | 3.55699  | 2.192166 |
| TCGA-78-8640-01 | 3.56623  | 8.525111 | 3.634693 | 6.411975 | 4.562977 | 1.171438 |
| TCGA-78-8648-01 | 5.019725 | 5.98978  | 2.498931 | 8.902996 | 5.358602 | 2.447948 |
| TCGA-78-8655-01 | 5.419362 | 8.564184 | 2.494657 | 7.453897 | 5.593185 | 1.78994  |
| TCGA-78-8660-01 | 4.580409 | 6.514028 | 3.805387 | 5.646924 | 6.192111 | 2.091445 |
| TCGA-78-8662-01 | 3.365071 | 8.691117 | 2.808985 | 6.192279 | 2.806887 | 1.531541 |
| TCGA-80-5608-01 | 4.469034 | 8.930983 | 3.280738 | 5.735678 | 3.493668 | 0.867133 |
| TCGA-80-5611-01 | 2.384179 | 7.432499 | 5.231907 | 5.866966 | 5.114778 | 0.76603  |
| TCGA-83-5908-01 | 6.304374 | 9.034819 | 4.553561 | 8.116468 | 3.818114 | 1.626308 |
| TCGA-86-6562-01 | 7.161613 | 8.878189 | 3.3448   | 8.322037 | 0.973541 | 1.960896 |
| TCGA-86-6851-01 | 4.346089 | 6.374479 | 2.878161 | 6.833451 | 3.768301 | 3.302613 |
| TCGA-86-7701-01 | 4.943127 | 7.294297 | 4.447929 | 8.409781 | 3.755564 | 3.670184 |
| TCGA-86-7711-01 | 3.845687 | 7.870017 | 3.377533 | 8.24779  | 3.793342 | 0.930155 |
| TCGA-86-7713-01 | 4.422204 | 9.447765 | 4.41538  | 6.447416 | 1.520435 | 1.545724 |
| TCGA-86-7714-01 | 6.762267 | 8.742582 | 2.487753 | 6.424401 | 4.166012 | 2.687859 |
| TCGA-86-7953-01 | 4.860252 | 8.070895 | 5.336512 | 7.993592 | 2.784216 | 1.985533 |
| TCGA-86-7954-01 | 4.292767 | 8.427266 | 3.833848 | 7.13727  | 4.056313 | 1.905559 |
| TCGA-86-7955-01 | 2.785072 | 8.010515 | 4.249975 | 5.135626 | 3.462714 | 0.713923 |
| TCGA-86-8054-01 | 5.664472 | 8.021113 | 5.379453 | 6.930921 | 0.647361 | 0.828278 |
| TCGA-86-8055-01 | 6.096238 | 8.089016 | 5.687716 | 9.782019 | 5.173693 | 1.500415 |
| TCGA-86-8056-01 | 5.896012 | 8.390609 | 1.810609 | 7.269121 | 5.263725 | 2.200844 |
| TCGA-86-8073-01 | 4.732357 | 9.152658 | 2.507069 | 8.136238 | 4.358557 | 1.964791 |
| TCGA-86-8074-01 | 5.223712 | 8.361005 | 4.190135 | 9.184474 | 2.700091 | 1.630653 |
| TCGA-86-8075-01 | 6.034875 | 8.867759 | 3.840991 | 8.87718  | 4.499285 | 1.727897 |
| TCGA-86-8076-01 | 4.48182  | 6.912466 | 1.972113 | 7.002073 | 5.542431 | 2.395161 |
| TCGA-86-8278-01 | 6.343796 | 8.620938 | 2.525041 | 7.834039 | 4.869351 | 1.601093 |
| TCGA-86-8279-01 | 5.467489 | 6.892096 | 3.743039 | 7.807849 | 3.257036 | 1.554646 |
| TCGA-86-8280-01 | 6.003314 | 6.928864 | 3.186752 | 6.891692 | 6.04704  | 2.886468 |
| TCGA-86-8358-01 | 4.896591 | 7.44817  | 5.549847 | 8.077309 | 2.549162 | 5.250153 |
| TCGA-86-8359-01 | 3.26122  | 8.631468 | 2.222987 | 6.685789 | 3.909102 | 3.573062 |
| TCGA-86-8585-01 | 3.009976 | 8.037747 | 3.324443 | 6.449905 | 5.376921 | 2.130299 |
| TCGA-86-8668-01 | 5.620589 | 5.72568  | 2.451945 | 7.665454 | 5.902732 | 2.30897  |
| TCGA-86-8669-01 | 4.35554  | 6.999288 | 3.149442 | 3.959458 | 3.107402 | 1.720599 |
| TCGA-86-8671-01 | 5.131132 | 6.592527 | 2.410624 | 7.329707 | 7.878323 | 4.154386 |
| TCGA-86-8672-01 | 5.555364 | 7.577227 | 4.156804 | 7.773841 | 2.559711 | 1.447079 |
| TCGA-86-8673-01 | 4.319654 | 7.381984 | 3.61646  | 6.47596  | 2.993062 | 1.344111 |
| TCGA-86-8674-01 | 4.342726 | 9.646997 | 2.4104   | 6.176373 | 1.972071 | 0.939016 |

|                 |          |          |          |          |          |          |
|-----------------|----------|----------|----------|----------|----------|----------|
| TCGA-86-A456-01 | 3.96665  | 6.781709 | 2.637473 | 6.255309 | 4.570173 | 1.751922 |
| TCGA-86-A4D0-01 | 3.222376 | 8.301903 | 5.106821 | 5.844588 | 0.704935 | 1.04376  |
| TCGA-86-A4JF-01 | 4.363762 | 8.080515 | 3.257801 | 6.281762 | 5.439566 | 1.858602 |
| TCGA-86-A4P7-01 | 5.64726  | 7.025363 | 2.434655 | 6.603682 | 5.616168 | 3.208068 |
| TCGA-86-A4P8-01 | 6.657573 | 4.609427 | 1.254901 | 3.784187 | 6.529886 | 3.633608 |
| TCGA-91-6828-01 | 4.562387 | 7.790737 | 3.953757 | 6.44329  | 4.191312 | 1.88849  |
| TCGA-91-6829-01 | 5.524926 | 8.459973 | 4.25197  | 9.037121 | 6.924316 | 1.37281  |
| TCGA-91-6830-01 | 5.531222 | 7.859868 | 3.852379 | 7.965422 | 1.312339 | 2.481409 |
| TCGA-91-6831-01 | 4.061478 | 6.873608 | 4.925906 | 8.519231 | 1.968837 | 1.439905 |
| TCGA-91-6835-01 | 5.568995 | 8.794685 | 3.983521 | 6.515894 | 4.631516 | 3.735831 |
| TCGA-91-6836-01 | 4.420834 | 8.650431 | 5.422085 | 5.803106 | 4.209476 | 3.938887 |
| TCGA-91-6840-01 | 4.94674  | 6.779763 | 3.499572 | 6.408618 | 5.180523 | 2.330293 |
| TCGA-91-6847-01 | 7.346846 | 8.2902   | 5.123151 | 4.809508 | 0.906205 | 0.431468 |
| TCGA-91-6848-01 | 4.720623 | 7.414929 | 5.469966 | 8.640936 | 3.727401 | 1.655918 |
| TCGA-91-6849-01 | 3.955873 | 8.205505 | 1.53928  | 6.220505 | 3.258329 | 2.736393 |
| TCGA-91-7771-01 | 4.045926 | 7.870067 | 2.922253 | 8.414097 | 3.102082 | 2.22239  |
| TCGA-91-8496-01 | 5.286097 | 5.893409 | 2.396854 | 4.39547  | 5.509758 | 1.352125 |
| TCGA-91-8497-01 | 4.870348 | 7.215386 | 1.440451 | 6.0893   | 6.549438 | 3.611706 |
| TCGA-91-8499-01 | 5.007813 | 6.885906 | 6.114494 | 7.438533 | 1.070432 | 1.776679 |
| TCGA-91-A4BC-01 | 4.416279 | 6.793913 | 3.597085 | 6.060922 | 2.80266  | 1.802422 |
| TCGA-91-A4BD-01 | 3.645051 | 5.503389 | 1.38394  | 3.019405 | 6.70342  | 1.136697 |
| TCGA-93-7347-01 | 5.327962 | 7.057767 | 2.623949 | 7.564392 | 6.894645 | 2.824631 |
| TCGA-93-7348-01 | 5.294161 | 8.0179   | 2.663919 | 7.826355 | 5.084131 | 2.3386   |
| TCGA-93-8067-01 | 4.379175 | 8.800725 | 3.432581 | 6.658344 | 3.789424 | 1.108955 |
| TCGA-93-A4JN-01 | 4.940253 | 7.208139 | 3.867613 | 7.27855  | 6.570151 | 2.965945 |
| TCGA-93-A4JO-01 | 4.495241 | 7.383709 | 2.497279 | 6.404034 | 5.028836 | 2.81623  |
| TCGA-93-A4JP-01 | 5.953792 | 7.107864 | 3.290917 | 4.837086 | 7.128777 | 3.007569 |
| TCGA-93-A4JQ-01 | 6.218531 | 7.193461 | 3.755904 | 8.913523 | 5.240067 | 3.480473 |
| TCGA-95-7039-01 | 5.687256 | 8.453075 | 4.124413 | 7.263339 | 5.499081 | 1.787609 |
| TCGA-95-7043-01 | 3.868955 | 8.269731 | 2.531714 | 4.97339  | 1.869734 | 2.392079 |
| TCGA-95-7562-01 | 4.692015 | 7.837757 | 4.228057 | 6.859687 | 5.125221 | 0.926492 |
| TCGA-95-7567-01 | 4.442458 | 7.516548 | 3.976299 | 7.204038 | 2.373333 | 1.977643 |
| TCGA-95-7944-01 | 3.227937 | 6.638453 | 3.348683 | 6.118752 | 3.691935 | 1.008283 |
| TCGA-95-7947-01 | 5.575218 | 8.4733   | 4.369321 | 6.064404 | 4.26761  | 1.958596 |
| TCGA-95-7948-01 | 2.994977 | 6.753563 | 2.307746 | 5.948075 | 3.799582 | 2.301008 |
| TCGA-95-8039-01 | 4.840766 | 6.858186 | 3.007788 | 6.895413 | 5.743038 | 2.055607 |
| TCGA-95-8494-01 | 3.459179 | 7.510401 | 5.463745 | 6.217777 | 5.613905 | 1.601845 |
| TCGA-95-A4VK-01 | 4.465888 | 9.253446 | 3.887057 | 6.218194 | 3.43009  | 2.367418 |
| TCGA-95-A4VN-01 | 5.162044 | 7.448954 | 4.126748 | 6.050245 | 4.289413 | 2.136919 |
| TCGA-95-A4VP-01 | 4.530529 | 7.108952 | 3.335355 | 5.717381 | 4.543499 | 2.586447 |
| TCGA-97-7546-01 | 5.877793 | 6.690272 | 2.545424 | 5.807855 | 6.095843 | 2.342024 |
| TCGA-97-7547-01 | 3.154049 | 9.411165 | 1.482454 | 6.334752 | 5.326844 | 1.870077 |
| TCGA-97-7552-01 | 6.107582 | 8.370185 | 2.388794 | 5.807818 | 6.175101 | 3.32816  |
| TCGA-97-7553-01 | 5.993541 | 7.564798 | 3.489997 | 6.115365 | 6.83927  | 3.050021 |
| TCGA-97-7554-01 | 4.800921 | 7.689747 | 2.771902 | 8.647361 | 4.65948  | 2.401797 |
| TCGA-97-7937-01 | 5.42459  | 7.539231 | 3.148599 | 6.543495 | 4.805931 | 0.495548 |
| TCGA-97-7938-01 | 6.158177 | 7.347499 | 1.92628  | 6.409229 | 6.431504 | 2.009565 |
| TCGA-97-7941-01 | 6.200601 | 8.037289 | 1.857103 | 6.228607 | 6.754475 | 2.791245 |
| TCGA-97-8171-01 | 4.990248 | 6.42068  | 3.253216 | 4.646459 | 2.09811  | 0.635241 |
| TCGA-97-8172-01 | 4.606225 | 9.446922 | 1.727676 | 6.316063 | 7.560882 | 3.668124 |
| TCGA-97-8174-01 | 4.814317 | 7.683902 | 1.951399 | 8.428182 | 4.608329 | 2.784355 |
| TCGA-97-8175-01 | 6.299018 | 8.533338 | 2.960887 | 6.721023 | 3.898056 | 2.013561 |
| TCGA-97-8176-01 | 5.72955  | 8.876552 | 4.361916 | 5.27197  | 3.622364 | 1.661189 |
| TCGA-97-8177-01 | 4.258861 | 6.517352 | 2.303645 | 5.939323 | 7.810846 | 2.763412 |
| TCGA-97-8179-01 | 5.562703 | 7.429922 | 3.21121  | 5.529203 | 3.92545  | 1.591413 |



|                 |          |          |          |          |          |          |
|-----------------|----------|----------|----------|----------|----------|----------|
| TCGA-97-8547-01 | 5.179657 | 7.299663 | 2.922736 | 8.597725 | 4.505    | 1.307497 |
| TCGA-97-8552-01 | 4.45075  | 6.059713 | 1.544093 | 4.977836 | 4.754682 | 2.56545  |
| TCGA-97-A4LX-01 | 4.24102  | 6.058496 | 3.96597  | 8.389454 | 5.363087 | 3.425999 |
| TCGA-97-A4M0-01 | 3.024415 | 6.731454 | 2.679006 | 4.775694 | 5.379237 | 1.894593 |
| TCGA-97-A4M1-01 | 5.274456 | 5.28062  | 1.815353 | 5.872041 | 6.630638 | 2.824055 |
| TCGA-97-A4M2-01 | 4.739895 | 6.021418 | 1.526209 | 4.755303 | 6.111959 | 3.24966  |
| TCGA-97-A4M3-01 | 4.877678 | 7.812493 | 1.653927 | 6.210166 | 2.523072 | 2.403024 |
| TCGA-97-A4M5-01 | 5.427262 | 9.147756 | 2.233592 | 7.414553 | 6.29625  | 2.806131 |
| TCGA-97-A4M6-01 | 5.998289 | 7.019291 | 2.630782 | 6.525021 | 5.67005  | 2.522774 |
| TCGA-97-A4M7-01 | 5.116754 | 6.316789 | 2.360514 | 7.769921 | 5.666026 | 2.658984 |
| TCGA-99-7458-01 | 5.605777 | 7.837547 | 3.068407 | 7.753833 | 0.692692 | 2.499356 |
| TCGA-99-8025-01 | 4.764803 | 7.643911 | 3.15062  | 7.730278 | 4.36499  | 2.010234 |
| TCGA-99-8028-01 | 4.836474 | 6.892329 | 2.300844 | 7.886561 | 2.631575 | 2.226376 |
| TCGA-99-8032-01 | 5.062789 | 7.928918 | 3.390229 | 7.578229 | 5.288373 | 1.864077 |
| TCGA-99-8033-01 | 4.183695 | 6.79796  | 4.630324 | 7.32896  | 4.053387 | 1.111229 |
| TCGA-99-AA5R-01 | 6.384511 | 6.053541 | 1.653016 | 5.505575 | 6.033853 | 4.142552 |
| TCGA-J2-8192-01 | 6.123993 | 8.249996 | 2.585877 | 9.011707 | 6.515709 | 1.825763 |
| TCGA-J2-8194-01 | 5.424733 | 7.587091 | 2.014361 | 8.428625 | 2.064373 | 2.001946 |
| TCGA-J2-A4AD-01 | 3.766225 | 8.114933 | 3.691329 | 6.480977 | 4.072106 | 0.83999  |
| TCGA-J2-A4AE-01 | 4.340122 | 6.570164 | 2.853977 | 3.296583 | 4.441746 | 2.114502 |
| TCGA-J2-A4AG-01 | 5.054566 | 7.93579  | 1.821386 | 7.717887 | 3.888946 | 2.394206 |
| TCGA-L4-A4E5-01 | 3.064646 | 8.679858 | 4.85583  | 6.72578  | 2.633363 | 1.525565 |
| TCGA-L4-A4E6-01 | 5.565424 | 5.293181 | 1.464919 | 5.444731 | 6.50605  | 2.799625 |
| TCGA-L9-A443-01 | 4.220208 | 8.036086 | 1.948126 | 7.728397 | 5.64475  | 1.34571  |
| TCGA-L9-A444-01 | 4.298003 | 6.091472 | 2.269043 | 5.108441 | 4.696301 | 2.105314 |
| TCGA-L9-A50W-01 | 6.924498 | 7.182524 | 1.434958 | 5.774212 | 6.509722 | 1.600225 |
| TCGA-L9-A5IP-01 | 5.191563 | 8.695917 | 3.809181 | 6.780793 | 3.179357 | 1.203507 |
| TCGA-L9-A743-01 | 5.441195 | 7.355812 | 3.412449 | 7.550159 | 5.790939 | 2.317489 |
| TCGA-L9-A7SV-01 | 3.357817 | 8.82377  | 2.586511 | 5.153677 | 1.890647 | 1.320921 |
| TCGA-L9-A8F4-01 | 3.19455  | 8.018693 | 4.096988 | 6.933159 | 3.242813 | 2.704613 |
| TCGA-MN-A4N1-01 | 4.039457 | 8.668827 | 2.699939 | 6.107657 | 2.032228 | 1.319659 |
| TCGA-MN-A4N4-01 | 6.468343 | 8.313421 | 1.516724 | 7.42221  | 5.637023 | 2.20403  |
| TCGA-MN-A4N5-01 | 5.354883 | 7.794695 | 3.538323 | 5.882374 | 3.091718 | 1.677949 |
| TCGA-MP-A4SV-01 | 4.358642 | 7.712095 | 3.650342 | 6.973582 | 5.861126 | 2.454433 |
| TCGA-MP-A4SW-01 | 4.119951 | 7.201719 | 3.588178 | 5.857798 | 2.577226 | 1.949592 |
| TCGA-MP-A4SY-01 | 6.679433 | 7.630136 | 3.450868 | 8.074424 | 5.177938 | 2.018267 |
| TCGA-MP-A4T4-01 | 4.164899 | 7.651935 | 3.631224 | 7.293435 | 3.914959 | 2.361952 |
| TCGA-MP-A4T6-01 | 5.476218 | 7.674835 | 1.247506 | 4.528934 | 5.730853 | 2.13103  |
| TCGA-MP-A4T7-01 | 4.599257 | 7.586318 | 3.993943 | 5.95447  | 3.483041 | 2.090318 |
| TCGA-MP-A4T8-01 | 5.319192 | 7.846751 | 3.523677 | 7.857909 | 2.975253 | 1.208855 |
| TCGA-MP-A4T9-01 | 6.423317 | 7.855574 | 3.230186 | 7.795516 | 6.536791 | 3.805712 |
| TCGA-MP-A4TA-01 | 3.723716 | 8.054887 | 4.997602 | 6.98516  | 2.933631 | 1.16453  |
| TCGA-MP-A4TC-01 | 5.812028 | 8.881215 | 3.944808 | 9.006952 | 5.682162 | 0.901621 |
| TCGA-MP-A4TD-01 | 3.99064  | 6.882131 | 2.632109 | 7.153563 | 4.413775 | 2.481475 |
| TCGA-MP-A4TE-01 | 3.19428  | 7.75144  | 2.39451  | 5.795918 | 1.523978 | 0.876511 |
| TCGA-MP-A4TF-01 | 6.499412 | 7.548981 | 4.635196 | 6.643335 | 2.951489 | 1.907584 |
| TCGA-MP-A4TH-01 | 5.116436 | 7.518544 | 1.93696  | 6.485728 | 4.241113 | 3.612148 |
| TCGA-MP-A4TI-01 | 6.758762 | 7.16909  | 4.706312 | 8.697825 | 6.57533  | 3.104358 |
| TCGA-MP-A4TJ-01 | 4.717851 | 7.519653 | 2.899966 | 8.043313 | 4.979616 | 3.106236 |
| TCGA-MP-A4TK-01 | 5.447792 | 7.998969 | 3.545397 | 8.488601 | 1.055634 | 2.236578 |
| TCGA-MP-A5C7-01 | 4.115638 | 6.886117 | 1.909857 | 5.207781 | 1.648043 | 1.164877 |
| TCGA-NJ-A4YF-01 | 3.445018 | 6.034645 | 3.918814 | 6.574496 | 1.809343 | 3.947813 |
| TCGA-NJ-A4YG-01 | 3.722075 | 6.523427 | 2.286268 | 7.030143 | 4.693542 | 1.352236 |
| TCGA-NJ-A4YI-01 | 3.601473 | 6.02279  | 1.853815 | 6.205656 | 3.541763 | 1.972395 |
| TCGA-NJ-A4YP-01 | 4.938257 | 8.020533 | 3.24554  | 8.262941 | 5.877452 | 1.321915 |

|                 |          |          |          |          |          |          |
|-----------------|----------|----------|----------|----------|----------|----------|
| TCGA-NJ-A4YQ-01 | 3.403342 | 8.824631 | 3.839489 | 6.31025  | 5.778462 | 2.791243 |
| TCGA-NJ-A55A-01 | 4.742498 | 7.630903 | 2.301279 | 6.803216 | 5.92329  | 3.209398 |
| TCGA-NJ-A55O-01 | 5.014079 | 8.646488 | 3.730454 | 5.423679 | 4.331621 | 2.623084 |
| TCGA-NJ-A55R-01 | 3.887509 | 8.175876 | 3.108132 | 7.135259 | 5.502238 | 1.989531 |
| TCGA-NJ-A7XG-01 | 6.586676 | 8.66242  | 2.161981 | 3.495504 | 5.079204 | 1.001503 |
| TCGA-O1-A52J-01 | 4.465356 | 6.744196 | 3.096152 | 6.401057 | 4.152013 | 1.168108 |
| TCGA-S2-AA1A-01 | 4.239296 | 8.338855 | 1.453199 | 7.682257 | 5.609946 | 2.619031 |
| TCGA-44-2661-11 | 6.808205 | 5.050413 | 1.500915 | 7.009089 | 7.634284 | 3.221536 |
| TCGA-91-6836-11 | 6.340922 | 5.078864 | 0.816009 | 4.686367 | 5.755861 | 2.711115 |
| TCGA-55-6986-11 | 6.78002  | 6.148554 | 0.849369 | 4.936812 | 5.14306  | 3.587677 |
| TCGA-49-6743-11 | 6.118661 | 4.941807 | 1.100742 | 6.939679 | 7.846735 | 2.486727 |
| TCGA-91-6849-11 | 6.52532  | 5.827263 | 1.188234 | 4.421481 | 6.601105 | 3.743977 |
| TCGA-55-6984-11 | 5.862708 | 5.141308 | 0.847945 | 3.426665 | 6.76486  | 2.286698 |
| TCGA-50-5932-11 | 7.115977 | 4.955376 | 1.100418 | 5.052665 | 7.084709 | 3.561775 |
| TCGA-50-5933-11 | 5.841525 | 5.052706 | 0.952412 | 2.588472 | 6.523049 | 2.725791 |
| TCGA-50-6595-11 | 7.102576 | 4.648502 | 0.823456 | 5.873317 | 8.202542 | 3.683107 |
| TCGA-91-6835-11 | 5.792374 | 6.478829 | 1.482331 | 6.919646 | 5.500271 | 2.974698 |
| TCGA-49-6744-11 | 7.042027 | 5.112482 | 1.155394 | 7.800965 | 7.79946  | 3.284001 |
| TCGA-55-6981-11 | 6.829963 | 5.143583 | 1.45884  | 7.06331  | 5.793865 | 4.102994 |
| TCGA-91-6829-11 | 5.275312 | 5.136409 | 1.707986 | 2.945772 | 6.573656 | 2.334897 |
| TCGA-44-5645-11 | 7.185827 | 4.942129 | 0.961397 | 4.861945 | 7.438224 | 3.67278  |
| TCGA-55-6983-11 | 5.154064 | 5.761795 | 1.277794 | 4.330712 | 4.672117 | 1.946821 |
| TCGA-49-4490-11 | 6.303811 | 4.778608 | 1.712059 | 6.81171  | 5.793795 | 2.108137 |
| TCGA-44-6777-11 | 6.149466 | 5.005549 | 1.507384 | 5.660677 | 7.375779 | 3.245808 |
| TCGA-44-6146-11 | 6.747483 | 5.147759 | 1.297615 | 5.27617  | 6.702975 | 3.705192 |
| TCGA-44-6147-11 | 6.388797 | 4.718904 | 1.836826 | 6.633328 | 6.338317 | 3.173831 |
| TCGA-91-6831-11 | 6.769222 | 4.687291 | 0.891559 | 6.006846 | 5.517931 | 2.966656 |
| TCGA-55-6972-11 | 7.137917 | 4.77885  | 1.083908 | 4.536983 | 5.60998  | 3.883909 |
| TCGA-38-4626-11 | 5.263418 | 4.989794 | 1.347896 | 3.631553 | 6.042199 | 1.995398 |
| TCGA-44-6148-11 | 6.266898 | 6.016327 | 1.155994 | 4.809091 | 7.66437  | 3.165331 |
| TCGA-55-6970-11 | 6.801476 | 4.912214 | 1.620732 | 5.099914 | 7.02213  | 3.4523   |
| TCGA-44-6144-11 | 6.426376 | 4.577653 | 1.650145 | 4.585995 | 4.568649 | 3.373554 |
| TCGA-55-6982-11 | 6.641535 | 5.285087 | 1.056001 | 5.613523 | 6.904518 | 3.499923 |
| TCGA-44-3398-11 | 6.830115 | 5.67828  | 1.518376 | 4.97644  | 6.288885 | 3.109089 |
| TCGA-49-4512-11 | 4.883586 | 5.284097 | 1.304626 | 5.998267 | 7.166372 | 1.342845 |
| TCGA-44-6145-11 | 5.376719 | 5.331547 | 0.881929 | 4.204086 | 7.197891 | 3.016115 |
| TCGA-91-6828-11 | 6.514607 | 5.279615 | 1.011292 | 3.862396 | 5.236385 | 2.610316 |
| TCGA-50-5936-11 | 7.069143 | 4.797989 | 1.134578 | 5.802517 | 5.755479 | 3.280472 |
| TCGA-73-4676-11 | 6.231488 | 4.470725 | 1.637607 | 4.481951 | 5.300773 | 2.252094 |
| TCGA-44-3396-11 | 6.330686 | 5.280025 | 1.070394 | 6.55259  | 7.185494 | 3.335612 |
| TCGA-38-4627-11 | 5.680117 | 4.407977 | 1.947912 | 5.822776 | 8.258741 | 2.276512 |
| TCGA-44-2668-11 | 5.081557 | 4.980853 | 1.497735 | 5.899683 | 6.832736 | 2.581441 |
| TCGA-55-6969-11 | 5.809652 | 5.33153  | 1.480188 | 6.328047 | 1.303712 | 3.02614  |
| TCGA-44-6776-11 | 6.609555 | 5.441649 | 1.054946 | 5.465339 | 6.186099 | 3.342615 |
| TCGA-50-5930-11 | 5.772359 | 5.004211 | 0.664051 | 4.164327 | 6.995933 | 3.23192  |
| TCGA-44-6778-11 | 6.692875 | 4.928527 | 0.920601 | 5.323461 | 6.049061 | 3.778852 |
| TCGA-55-6980-11 | 6.236261 | 4.946689 | 0.624978 | 2.803336 | 7.326163 | 3.466007 |
| TCGA-50-5935-11 | 6.583609 | 5.575786 | 1.326822 | 6.474109 | 6.192073 | 3.260986 |
| TCGA-50-5931-11 | 6.104728 | 4.302353 | 0.419363 | 4.985844 | 5.650209 | 3.389677 |
| TCGA-38-4625-11 | 5.697417 | 4.4756   | 0.657473 | 4.147761 | 8.196324 | 2.78394  |
| TCGA-55-6979-11 | 5.655723 | 4.969461 | 1.125688 | 5.694617 | 4.198817 | 2.597743 |
| TCGA-91-6847-11 | 5.950194 | 5.498184 | 0.814586 | 4.244859 | 4.788449 | 2.688749 |
| TCGA-55-6978-11 | 6.09465  | 5.788591 | 1.165918 | 3.665393 | 7.308153 | 3.35623  |
| TCGA-50-5939-11 | 6.434435 | 4.866246 | 0.493041 | 6.460683 | 7.630235 | 3.461259 |
| TCGA-55-6968-11 | 5.560306 | 4.941273 | 1.429881 | 3.503087 | 5.488604 | 3.0314   |

|                 |          |          |          |          |          |          |
|-----------------|----------|----------|----------|----------|----------|----------|
| TCGA-55-6971-11 | 6.19902  | 5.029378 | 0.976852 | 4.321667 | 6.236321 | 2.478457 |
| TCGA-49-6761-11 | 6.879157 | 5.040486 | 0.877383 | 4.103553 | 5.68199  | 3.027032 |
| TCGA-44-2657-11 | 5.882032 | 5.061466 | 2.7289   | 5.131803 | 7.373166 | 3.937634 |
| TCGA-55-6985-11 | 6.340578 | 5.591988 | 1.336272 | 4.659824 | 6.027994 | 3.083168 |
| TCGA-44-2662-11 | 6.16718  | 4.941081 | 0.86419  | 5.915647 | 8.271019 | 3.33069  |
| TCGA-44-2665-11 | 5.421025 | 5.540952 | 0.997731 | 7.254009 | 7.229619 | 2.565431 |
| TCGA-49-6745-11 | 5.617478 | 5.243125 | 1.651894 | 5.566473 | 7.054084 | 2.085759 |
| TCGA-44-2655-11 | 6.75476  | 5.216642 | 1.177633 | 6.9849   | 6.522968 | 3.914503 |
| TCGA-55-6975-11 | 6.45846  | 5.282346 | 1.867091 | 3.552067 | 8.228524 | 2.940245 |
| TCGA-49-6742-11 | 5.433519 | 6.130527 | 1.408091 | 6.891818 | 6.31724  | 2.002503 |
| TCGA-38-4632-11 | 4.957998 | 4.763477 | 2.102243 | 3.282435 | 6.711547 | 1.919904 |

---

Supplementary Table 1. The gene expressions and CNV status of the six-gene in TCGA datasets

| Samples           | EFNB2   | GOLM1   | HMMR    | POSTN   | TPSB2   | CBFA2T3 |
|-------------------|---------|---------|---------|---------|---------|---------|
| TCGA-95-7948-01   | CNV     | CNV     | Diploid | CNV     | Diploid | Diploid |
| TCGA-97-A4LX-01   | Diploid | Diploid | Diploid | Diploid | Diploid | Diploid |
| TCGA-L9-A50W-01   | Diploid | Diploid | CNV     | Diploid | Diploid | Diploid |
| TCGA-62-8402-01   | Diploid | CNV     | CNV     | Diploid | CNV     | CNV     |
| TCGA-64-1676-01   | CNV     | CNV     | CNV     | CNV     | Diploid | CNV     |
| TCGA-44-3398-01   | Diploid | Diploid | Diploid | Diploid | Diploid | Diploid |
| TCGA-49-4506-01   | Diploid | Diploid | Diploid | Diploid | Diploid | Diploid |
| TCGA-NJ-A4YQ-01   | Diploid | Diploid | Diploid | Diploid | Diploid | CNV     |
| TCGA-86-8281-01   | Diploid | Diploid | Diploid | Diploid | Diploid | Diploid |
| TCGA-49-6767-01   | Diploid | CNV     | CNV     | Diploid | CNV     | Diploid |
| TCGA-05-4397-01   | CNV     | Diploid | Diploid | CNV     | Diploid | Diploid |
| TCGA-69-8255-01   | CNV     | CNV     | Diploid | CNV     | CNV     | CNV     |
| TCGA-71-6725-01   | Diploid | Diploid | CNV     | CNV     | CNV     | CNV     |
| TCGA-62-8397-01   | CNV     | Diploid | Diploid | CNV     | Diploid | Diploid |
| TCGA-55-6983-01   | Diploid | Diploid | Diploid | Diploid | Diploid | Diploid |
| TCGA-55-7573-01   | CNV     | CNV     | Diploid | CNV     | CNV     | Diploid |
| TCGA-64-1681-01   | Diploid | CNV     | Diploid | CNV     | CNV     | Diploid |
| TCGA-91-6836-01   | CNV     | CNV     | Diploid | CNV     | Diploid | Diploid |
| TCGA-73-7499-01   | CNV     | CNV     | Diploid | CNV     | Diploid | Diploid |
| TCGA-44-3918-01   | Diploid | Diploid | Diploid | Diploid | Diploid | Diploid |
| TCGA-78-7148-01   | Diploid | CNV     | Diploid | Diploid | Diploid | Diploid |
| TCGA-67-3772-01   | CNV     | CNV     | Diploid | Diploid | CNV     | CNV     |
| TCGA-55-7726-01   | Diploid | CNV     | Diploid | Diploid | Diploid | Diploid |
| TCGA-44-2662-01   | Diploid | Diploid | Diploid | CNV     | Diploid | Diploid |
| TCGA-62-A46O-01   | CNV     | CNV     | CNV     | Diploid | Diploid | CNV     |
| TCGA-62-A472-01   | CNV     | Diploid | Diploid | CNV     | Diploid | Diploid |
| TCGA-50-6594-01   | Diploid | CNV     | Diploid | Diploid | CNV     | CNV     |
| TCGA-78-7220-01   | Diploid | Diploid | CNV     | Diploid | Diploid | CNV     |
| TCGA-73-4658-01   | Diploid | Diploid | Diploid | Diploid | Diploid | CNV     |
| TCGA-95-7562-01   | CNV     | Diploid | Diploid | CNV     | Diploid | CNV     |
| TCGA-38-7271-01   | Diploid | Diploid | Diploid | Diploid | Diploid | Diploid |
| TCGA-44-2662-01.1 | Diploid | Diploid | Diploid | CNV     | CNV     | Diploid |
| TCGA-62-8398-01   | Diploid | CNV     | Diploid | Diploid | Diploid | CNV     |
| TCGA-91-6831-01   | CNV     | CNV     | CNV     | CNV     | CNV     | Diploid |
| TCGA-55-8507-01   | CNV     | Diploid | CNV     | Diploid | CNV     | CNV     |
| TCGA-55-6642-01   | Diploid | Diploid | Diploid | Diploid | Diploid | Diploid |
| TCGA-97-8174-01   | Diploid | CNV     | CNV     | Diploid | Diploid | CNV     |
| TCGA-86-7714-01   | Diploid | Diploid | Diploid | Diploid | Diploid | Diploid |
| TCGA-44-2656-01   | CNV     | Diploid | CNV     | CNV     | Diploid | Diploid |
| TCGA-75-6214-01   | CNV     | Diploid | Diploid | CNV     | Diploid | CNV     |
| TCGA-78-7537-01   | CNV     | Diploid | Diploid | CNV     | Diploid | CNV     |
| TCGA-L4-A4E5-01   | CNV     | Diploid | Diploid | CNV     | CNV     | CNV     |
| TCGA-05-4403-01   | Diploid | Diploid | Diploid | Diploid | Diploid | Diploid |
| TCGA-05-4389-01   | CNV     | Diploid | CNV     | CNV     | Diploid | CNV     |
| TCGA-86-8359-01   | CNV     | Diploid | CNV     | CNV     | CNV     | CNV     |
| TCGA-69-7765-01   | Diploid | Diploid | CNV     | Diploid | Diploid | Diploid |
| TCGA-62-A46P-01   | Diploid | Diploid | Diploid | Diploid | Diploid | Diploid |
| TCGA-L9-A743-01   | Diploid | Diploid | Diploid | Diploid | Diploid | Diploid |
| TCGA-44-3398-01.1 | Diploid | Diploid | Diploid | Diploid | Diploid | Diploid |
| TCGA-05-4424-01   | Diploid | Diploid | Diploid | CNV     | Diploid | Diploid |
| TCGA-05-4250-01   | CNV     | CNV     | Diploid | CNV     | Diploid | Diploid |
| TCGA-75-5146-01   | CNV     | CNV     | CNV     | CNV     | Diploid | Diploid |
| TCGA-44-7662-01   | Diploid | Diploid | CNV     | Diploid | Diploid | Diploid |

|                   |         |         |         |         |         |         |
|-------------------|---------|---------|---------|---------|---------|---------|
| TCGA-53-7626-01   | CNV     | Diploid | CNV     | Diploid | Diploid | Diploid |
| TCGA-78-7150-01   | Diploid | CNV     | CNV     | CNV     | Diploid | CNV     |
| TCGA-49-AARQ-01   | Diploid | Diploid | CNV     | Diploid | CNV     | CNV     |
| TCGA-MP-A4TA-01   | Diploid | Diploid | Diploid | Diploid | Diploid | Diploid |
| TCGA-62-8399-01   | CNV     | CNV     | CNV     | CNV     | Diploid | Diploid |
| TCGA-86-8671-01   | Diploid | Diploid | Diploid | Diploid | Diploid | Diploid |
| TCGA-MP-A4T2-01   | CNV     | Diploid | CNV     | CNV     | Diploid | Diploid |
| TCGA-91-A4BC-01   | Diploid | Diploid | Diploid | Diploid | Diploid | Diploid |
| TCGA-NJ-A4YG-01   | Diploid | Diploid | CNV     | Diploid | CNV     | Diploid |
| TCGA-64-1678-01   | CNV     | Diploid | Diploid | CNV     | Diploid | CNV     |
| TCGA-97-A4M2-01   | Diploid | Diploid | Diploid | Diploid | Diploid | Diploid |
| TCGA-55-8207-01   | CNV     | CNV     | CNV     | CNV     | CNV     | CNV     |
| TCGA-95-7043-01   | Diploid | CNV     | CNV     | CNV     | Diploid | Diploid |
| TCGA-49-AARO-01   | CNV     | Diploid | Diploid | CNV     | CNV     | Diploid |
| TCGA-38-4632-01   | CNV     | Diploid | Diploid | CNV     | Diploid | Diploid |
| TCGA-71-8520-01   | Diploid | CNV     | CNV     | CNV     | Diploid | CNV     |
| TCGA-55-7725-01   | Diploid | Diploid | Diploid | Diploid | Diploid | Diploid |
| TCGA-55-8505-01   | Diploid | Diploid | Diploid | Diploid | Diploid | Diploid |
| TCGA-49-AAR4-01   | Diploid | Diploid | Diploid | Diploid | Diploid | Diploid |
| TCGA-55-A48Y-01   | Diploid | Diploid | CNV     | Diploid | Diploid | Diploid |
| TCGA-55-7911-01   | Diploid | Diploid | Diploid | Diploid | Diploid | Diploid |
| TCGA-44-7667-01   | CNV     | CNV     | CNV     | CNV     | CNV     | Diploid |
| TCGA-L4-A4E6-01   | Diploid | Diploid | Diploid | Diploid | Diploid | Diploid |
| TCGA-97-A4M7-01   | Diploid | CNV     | Diploid | Diploid | CNV     | CNV     |
| TCGA-38-4627-01   | Diploid | Diploid | Diploid | Diploid | Diploid | Diploid |
| TCGA-MP-A4TI-01   | Diploid | Diploid | Diploid | Diploid | Diploid | Diploid |
| TCGA-44-4112-01   | Diploid | Diploid | CNV     | Diploid | CNV     | CNV     |
| TCGA-44-5645-01   | Diploid | Diploid | CNV     | Diploid | CNV     | Diploid |
| TCGA-44-6777-01   | Diploid | Diploid | Diploid | Diploid | Diploid | Diploid |
| TCGA-44-6147-01   | Diploid | CNV     | Diploid | CNV     | CNV     | CNV     |
| TCGA-44-2666-01   | Diploid | Diploid | Diploid | Diploid | Diploid | Diploid |
| TCGA-95-A4VP-01   | Diploid | Diploid | CNV     | CNV     | Diploid | Diploid |
| TCGA-55-6975-01   | Diploid | Diploid | Diploid | Diploid | CNV     | CNV     |
| TCGA-44-7671-01   | CNV     | CNV     | Diploid | CNV     | Diploid | Diploid |
| TCGA-97-A4M6-01   | Diploid | CNV     | Diploid | Diploid | Diploid | Diploid |
| TCGA-55-7727-01   | Diploid | Diploid | Diploid | CNV     | Diploid | Diploid |
| TCGA-73-A9RS-01   | Diploid | CNV     | Diploid | Diploid | CNV     | Diploid |
| TCGA-L9-A444-01   | CNV     | Diploid | CNV     | Diploid | Diploid | CNV     |
| TCGA-78-7540-01   | Diploid | Diploid | Diploid | Diploid | Diploid | Diploid |
| TCGA-78-7159-01   | Diploid | CNV     | Diploid | Diploid | Diploid | CNV     |
| TCGA-MP-A4TH-01   | Diploid | Diploid | CNV     | Diploid | Diploid | Diploid |
| TCGA-55-A4DF-01   | Diploid | CNV     | Diploid | Diploid | Diploid | Diploid |
| TCGA-78-7542-01   | Diploid | Diploid | Diploid | Diploid | CNV     | CNV     |
| TCGA-73-4675-01   | CNV     | Diploid | Diploid | CNV     | Diploid | Diploid |
| TCGA-91-8497-01   | Diploid | Diploid | Diploid | Diploid | CNV     | Diploid |
| TCGA-55-6980-01   | CNV     | CNV     | CNV     | CNV     | Diploid | CNV     |
| TCGA-44-2666-01.1 | Diploid | Diploid | Diploid | Diploid | Diploid | Diploid |
| TCGA-38-4630-01   | Diploid | CNV     | CNV     | Diploid | CNV     | CNV     |
| TCGA-44-6146-01   | Diploid | Diploid | CNV     | Diploid | Diploid | Diploid |
| TCGA-55-6987-01   | Diploid | Diploid | Diploid | Diploid | Diploid | Diploid |
| TCGA-05-5715-01   | Diploid | CNV     | CNV     | Diploid | Diploid | Diploid |
| TCGA-49-4494-01   | Diploid | Diploid | Diploid | Diploid | Diploid | Diploid |
| TCGA-55-7724-01   | Diploid | Diploid | Diploid | Diploid | Diploid | Diploid |
| TCGA-53-7813-01   | CNV     | Diploid | Diploid | CNV     | Diploid | Diploid |
| TCGA-99-8028-01   | Diploid | Diploid | Diploid | Diploid | Diploid | CNV     |

|                   |         |         |         |         |         |         |
|-------------------|---------|---------|---------|---------|---------|---------|
| TCGA-55-1592-01   | CNV     | CNV     | CNV     | CNV     | CNV     | Diploid |
| TCGA-86-A4P8-01   | Diploid | Diploid | Diploid | Diploid | Diploid | Diploid |
| TCGA-67-6215-01   | Diploid | Diploid | CNV     | Diploid | CNV     | CNV     |
| TCGA-86-8054-01   | CNV     | Diploid | Diploid | CNV     | CNV     | CNV     |
| TCGA-86-A4JF-01   | Diploid | Diploid | Diploid | Diploid | CNV     | CNV     |
| TCGA-55-7570-01   | Diploid | CNV     | CNV     | Diploid | Diploid | Diploid |
| TCGA-05-5425-01   | Diploid | CNV     | Diploid | CNV     | Diploid | Diploid |
| TCGA-97-8179-01   | Diploid | Diploid | CNV     | Diploid | CNV     | CNV     |
| TCGA-86-7954-01   | Diploid | Diploid | Diploid | CNV     | Diploid | CNV     |
| TCGA-75-5147-01   | CNV     | Diploid | CNV     | CNV     | Diploid | Diploid |
| TCGA-55-1595-01   | CNV     | Diploid | CNV     | CNV     | Diploid | CNV     |
| TCGA-93-8067-01   | Diploid | Diploid | Diploid | Diploid | Diploid | CNV     |
| TCGA-50-5946-01   | CNV     | CNV     | CNV     | Diploid | CNV     | CNV     |
| TCGA-99-8025-01   | Diploid | Diploid | CNV     | Diploid | Diploid | Diploid |
| TCGA-50-5044-01   | Diploid | Diploid | Diploid | Diploid | Diploid | Diploid |
| TCGA-67-6217-01   | Diploid | CNV     | Diploid | Diploid | Diploid | Diploid |
| TCGA-NJ-A55O-01   | Diploid | Diploid | CNV     | Diploid | Diploid | Diploid |
| TCGA-44-7672-01   | Diploid | Diploid | Diploid | Diploid | Diploid | Diploid |
| TCGA-75-5125-01   | CNV     | Diploid | Diploid | CNV     | Diploid | CNV     |
| TCGA-55-8619-01   | Diploid | Diploid | Diploid | Diploid | Diploid | Diploid |
| TCGA-49-4486-01   | Diploid | Diploid | Diploid | Diploid | Diploid | Diploid |
| TCGA-55-7910-01   | Diploid | Diploid | Diploid | Diploid | CNV     | CNV     |
| TCGA-78-8648-01   | Diploid | Diploid | Diploid | Diploid | Diploid | Diploid |
| TCGA-55-6712-01   | CNV     | CNV     | Diploid | CNV     | Diploid | Diploid |
| TCGA-55-8206-01   | Diploid | CNV     | Diploid | CNV     | Diploid | Diploid |
| TCGA-69-8254-01   | Diploid | Diploid | Diploid | Diploid | Diploid | Diploid |
| TCGA-44-6778-01   | CNV     | CNV     | CNV     | CNV     | Diploid | Diploid |
| TCGA-50-6592-01   | Diploid | Diploid | Diploid | Diploid | Diploid | Diploid |
| TCGA-MN-A4N5-01   | Diploid | Diploid | Diploid | Diploid | Diploid | CNV     |
| TCGA-44-6147-01.1 | Diploid | CNV     | Diploid | CNV     | CNV     | Diploid |
| TCGA-49-AARR-01   | Diploid | Diploid | Diploid | Diploid | Diploid | Diploid |
| TCGA-78-7147-01   | Diploid | CNV     | CNV     | CNV     | Diploid | Diploid |
| TCGA-J2-A4AE-01   | CNV     | Diploid | CNV     | CNV     | Diploid | Diploid |
| TCGA-50-6593-01   | Diploid | Diploid | Diploid | Diploid | Diploid | Diploid |
| TCGA-44-7670-01   | Diploid | CNV     | CNV     | CNV     | Diploid | Diploid |
| TCGA-86-8055-01   | CNV     | Diploid | CNV     | CNV     | Diploid | Diploid |
| TCGA-64-5815-01   | Diploid | Diploid | CNV     | Diploid | CNV     | CNV     |
| TCGA-78-7161-01   | CNV     | CNV     | CNV     | CNV     | Diploid | CNV     |
| TCGA-73-4677-01   | Diploid | Diploid | Diploid | Diploid | Diploid | Diploid |
| TCGA-75-7025-01   | Diploid | CNV     | Diploid | Diploid | CNV     | CNV     |
| TCGA-75-6203-01   | Diploid | Diploid | Diploid | Diploid | Diploid | Diploid |
| TCGA-44-A4SU-01   | Diploid | CNV     | Diploid | CNV     | CNV     | Diploid |
| TCGA-NJ-A4YI-01   | Diploid | Diploid | Diploid | Diploid | CNV     | CNV     |
| TCGA-55-7903-01   | CNV     | CNV     | Diploid | CNV     | Diploid | Diploid |
| TCGA-78-7166-01   | Diploid | Diploid | Diploid | Diploid | Diploid | Diploid |
| TCGA-73-4662-01   | CNV     | CNV     | Diploid | CNV     | Diploid | CNV     |
| TCGA-44-2656-01.1 | CNV     | Diploid | CNV     | CNV     | Diploid | Diploid |
| TCGA-44-7660-01   | CNV     | CNV     | CNV     | CNV     | CNV     | CNV     |
| TCGA-97-8177-01   | Diploid | Diploid | Diploid | Diploid | CNV     | Diploid |
| TCGA-44-3917-01   | CNV     | CNV     | CNV     | Diploid | CNV     | Diploid |
| TCGA-64-1677-01   | Diploid | Diploid | Diploid | Diploid | Diploid | Diploid |
| TCGA-55-A491-01   | Diploid | CNV     | CNV     | CNV     | CNV     | Diploid |
| TCGA-97-7553-01   | Diploid | Diploid | Diploid | Diploid | Diploid | Diploid |
| TCGA-86-7711-01   | CNV     | CNV     | CNV     | CNV     | Diploid | CNV     |
| TCGA-49-AAR0-01   | Diploid | Diploid | Diploid | Diploid | Diploid | Diploid |

|                   |         |         |         |         |         |         |
|-------------------|---------|---------|---------|---------|---------|---------|
| TCGA-91-6840-01   | CNV     | CNV     | CNV     | CNV     | Diploid | Diploid |
| TCGA-50-6597-01   | CNV     | CNV     | Diploid | CNV     | Diploid | Diploid |
| TCGA-86-8585-01   | Diploid | Diploid | Diploid | Diploid | Diploid | Diploid |
| TCGA-05-4244-01   | CNV     | CNV     | CNV     | CNV     | CNV     | CNV     |
| TCGA-91-A4BD-01   | Diploid | Diploid | CNV     | Diploid | Diploid | Diploid |
| TCGA-50-5072-01   | Diploid | CNV     | Diploid | Diploid | Diploid | Diploid |
| TCGA-93-7348-01   | Diploid | Diploid | CNV     | Diploid | CNV     | CNV     |
| TCGA-78-7536-01   | Diploid | Diploid | Diploid | CNV     | CNV     | CNV     |
| TCGA-69-7764-01   | CNV     | Diploid | Diploid | CNV     | CNV     | Diploid |
| TCGA-49-AAR9-01   | CNV     | Diploid | Diploid | CNV     | CNV     | Diploid |
| TCGA-91-6847-01   | CNV     | CNV     | Diploid | Diploid | CNV     | CNV     |
| TCGA-44-2665-01   | Diploid | Diploid | CNV     | Diploid | CNV     | CNV     |
| TCGA-97-8547-01   | Diploid | CNV     | Diploid | CNV     | Diploid | Diploid |
| TCGA-80-5611-01   | CNV     | CNV     | Diploid | CNV     | Diploid | CNV     |
| TCGA-MP-A4TD-01   | CNV     | Diploid | Diploid | Diploid | Diploid | Diploid |
| TCGA-67-3774-01   | Diploid | CNV     | Diploid | Diploid | Diploid | Diploid |
| TCGA-55-8204-01   | Diploid | CNV     | CNV     | CNV     | Diploid | Diploid |
| TCGA-55-A48X-01   | Diploid | Diploid | Diploid | Diploid | Diploid | Diploid |
| TCGA-86-8674-01   | Diploid | Diploid | Diploid | Diploid | Diploid | Diploid |
| TCGA-75-6207-01   | Diploid | Diploid | Diploid | CNV     | CNV     | Diploid |
| TCGA-86-8278-01   | Diploid | Diploid | Diploid | Diploid | CNV     | Diploid |
| TCGA-05-4382-01   | Diploid | Diploid | CNV     | Diploid | Diploid | Diploid |
| TCGA-78-7539-01   | Diploid | Diploid | Diploid | CNV     | Diploid | Diploid |
| TCGA-91-6829-01   | Diploid | CNV     | Diploid | CNV     | CNV     | CNV     |
| TCGA-44-5645-01.1 | Diploid | Diploid | Diploid | Diploid | Diploid | Diploid |
| TCGA-69-7761-01   | Diploid | CNV     | Diploid | Diploid | Diploid | Diploid |
| TCGA-55-6969-01   | Diploid | Diploid | Diploid | Diploid | Diploid | Diploid |
| TCGA-50-8460-01   | CNV     | CNV     | Diploid | CNV     | Diploid | Diploid |
| TCGA-55-8615-01   | Diploid | CNV     | CNV     | CNV     | CNV     | CNV     |
| TCGA-J2-8194-01   | CNV     | Diploid | Diploid | CNV     | Diploid | Diploid |
| TCGA-05-5429-01   | Diploid | Diploid | Diploid | Diploid | Diploid | CNV     |
| TCGA-44-A479-01   | Diploid | CNV     | Diploid | Diploid | Diploid | Diploid |
| TCGA-55-8087-01   | Diploid | Diploid | Diploid | Diploid | Diploid | Diploid |
| TCGA-55-7994-01   | Diploid | CNV     | Diploid | CNV     | CNV     | Diploid |
| TCGA-50-6591-01   | CNV     | Diploid | Diploid | CNV     | CNV     | CNV     |
| TCGA-55-8511-01   | Diploid | Diploid | Diploid | Diploid | Diploid | Diploid |
| TCGA-55-6978-01   | Diploid | Diploid | Diploid | Diploid | Diploid | Diploid |
| TCGA-50-5935-01   | CNV     | Diploid | CNV     | CNV     | Diploid | Diploid |
| TCGA-73-4676-01   | Diploid | Diploid | Diploid | Diploid | Diploid | Diploid |
| TCGA-93-A4JQ-01   | Diploid | Diploid | Diploid | Diploid | Diploid | Diploid |
| TCGA-05-4249-01   | Diploid | Diploid | Diploid | Diploid | CNV     | CNV     |
| TCGA-44-5644-01   | CNV     | CNV     | CNV     | CNV     | CNV     | CNV     |
| TCGA-44-6775-01   | CNV     | Diploid | Diploid | Diploid | Diploid | CNV     |
| TCGA-91-6849-01   | Diploid | Diploid | Diploid | Diploid | Diploid | Diploid |
| TCGA-91-8499-01   | CNV     | Diploid | Diploid | CNV     | CNV     | CNV     |
| TCGA-44-2668-01   | Diploid | Diploid | Diploid | Diploid | Diploid | Diploid |
| TCGA-97-8176-01   | Diploid | Diploid | Diploid | Diploid | Diploid | Diploid |
| TCGA-55-6986-01   | Diploid | Diploid | Diploid | Diploid | Diploid | Diploid |
| TCGA-55-8092-01   | Diploid | Diploid | Diploid | CNV     | Diploid | Diploid |
| TCGA-50-5932-01   | CNV     | CNV     | Diploid | Diploid | CNV     | Diploid |
| TCGA-55-6981-01   | CNV     | CNV     | Diploid | CNV     | Diploid | Diploid |
| TCGA-62-A46U-01   | Diploid | Diploid | Diploid | CNV     | Diploid | CNV     |
| TCGA-44-2659-01   | Diploid | Diploid | CNV     | Diploid | CNV     | CNV     |
| TCGA-73-4666-01   | CNV     | Diploid | Diploid | Diploid | CNV     | Diploid |
| TCGA-05-4426-01   | Diploid | Diploid | Diploid | CNV     | Diploid | Diploid |

|                   |         |         |         |         |         |         |
|-------------------|---------|---------|---------|---------|---------|---------|
| TCGA-55-7284-01   | Diploid | Diploid | Diploid | Diploid | Diploid | Diploid |
| TCGA-99-AA5R-01   | Diploid | Diploid | Diploid | Diploid | Diploid | Diploid |
| TCGA-93-A4JN-01   | Diploid | Diploid | Diploid | Diploid | Diploid | Diploid |
| TCGA-49-4487-01   | Diploid | Diploid | Diploid | Diploid | Diploid | CNV     |
| TCGA-44-2668-01.1 | Diploid | Diploid | Diploid | Diploid | Diploid | Diploid |
| TCGA-55-8614-01   | Diploid | CNV     | CNV     | CNV     | Diploid | Diploid |
| TCGA-05-5423-01   | CNV     | Diploid | CNV     | CNV     | CNV     | CNV     |
| TCGA-86-7953-01   | CNV     | Diploid | CNV     | CNV     | Diploid | CNV     |
| TCGA-86-A4P7-01   | Diploid | Diploid | Diploid | Diploid | Diploid | Diploid |
| TCGA-50-6595-01   | Diploid | Diploid | Diploid | Diploid | Diploid | Diploid |
| TCGA-MP-A4T7-01   | Diploid | CNV     | Diploid | Diploid | Diploid | Diploid |
| TCGA-91-7771-01   | Diploid | Diploid | Diploid | CNV     | Diploid | CNV     |
| TCGA-93-A4JO-01   | Diploid | Diploid | Diploid | Diploid | Diploid | Diploid |
| TCGA-86-8075-01   | CNV     | Diploid | Diploid | CNV     | Diploid | CNV     |
| TCGA-49-AAR2-01   | Diploid | CNV     | CNV     | Diploid | Diploid | Diploid |
| TCGA-49-AAR3-01   | Diploid | Diploid | Diploid | Diploid | Diploid | Diploid |
| TCGA-44-A47G-01   | Diploid | Diploid | Diploid | Diploid | Diploid | Diploid |
| TCGA-86-8358-01   | Diploid | Diploid | Diploid | Diploid | Diploid | Diploid |
| TCGA-78-8662-01   | CNV     | CNV     | CNV     | Diploid | Diploid | CNV     |
| TCGA-97-8172-01   | Diploid | Diploid | Diploid | Diploid | Diploid | Diploid |
| TCGA-44-3396-01   | Diploid | Diploid | Diploid | Diploid | Diploid | Diploid |
| TCGA-J2-8192-01   | Diploid | Diploid | Diploid | CNV     | CNV     | Diploid |
| TCGA-49-4505-01   | CNV     | CNV     | CNV     | Diploid | CNV     | Diploid |
| TCGA-86-8280-01   | CNV     | CNV     | Diploid | CNV     | Diploid | Diploid |
| TCGA-62-A470-01   | CNV     | CNV     | CNV     | Diploid | Diploid | CNV     |
| TCGA-49-4488-01   | CNV     | Diploid | CNV     | Diploid | CNV     | Diploid |
| TCGA-91-6830-01   | Diploid | Diploid | Diploid | Diploid | Diploid | Diploid |
| TCGA-L9-A443-01   | CNV     | Diploid | Diploid | CNV     | Diploid | CNV     |
| TCGA-75-6211-01   | CNV     | CNV     | CNV     | CNV     | Diploid | Diploid |
| TCGA-MP-A4TK-01   | Diploid | Diploid | Diploid | Diploid | Diploid | Diploid |
| TCGA-91-6828-01   | CNV     | Diploid | Diploid | CNV     | Diploid | Diploid |
| TCGA-MP-A4TC-01   | Diploid | Diploid | Diploid | Diploid | Diploid | Diploid |
| TCGA-L9-A8F4-01   | Diploid | Diploid | Diploid | Diploid | CNV     | Diploid |
| TCGA-49-6742-01   | Diploid | Diploid | Diploid | Diploid | Diploid | Diploid |
| TCGA-55-A494-01   | Diploid | CNV     | Diploid | Diploid | CNV     | Diploid |
| TCGA-44-3396-01.1 | Diploid | Diploid | Diploid | Diploid | Diploid | Diploid |
| TCGA-78-7156-01   | Diploid | Diploid | Diploid | Diploid | CNV     | Diploid |
| TCGA-50-5939-01   | Diploid | Diploid | Diploid | CNV     | Diploid | Diploid |
| TCGA-44-A4SS-01   | Diploid | Diploid | Diploid | Diploid | Diploid | Diploid |
| TCGA-53-A4EZ-01   | CNV     | Diploid | CNV     | CNV     | CNV     | CNV     |
| TCGA-55-8506-01   | Diploid | Diploid | CNV     | Diploid | CNV     | CNV     |
| TCGA-49-6745-01   | Diploid | Diploid | Diploid | CNV     | Diploid | Diploid |
| TCGA-05-4396-01   | Diploid | Diploid | Diploid | Diploid | CNV     | CNV     |
| TCGA-J2-A4AG-01   | Diploid | Diploid | Diploid | Diploid | Diploid | Diploid |
| TCGA-86-8076-01   | Diploid | Diploid | Diploid | Diploid | Diploid | Diploid |
| TCGA-86-A4D0-01   | CNV     | Diploid | Diploid | CNV     | Diploid | Diploid |
| TCGA-62-A46R-01   | CNV     | Diploid | CNV     | Diploid | Diploid | Diploid |
| TCGA-55-6968-01   | CNV     | Diploid | CNV     | CNV     | CNV     | CNV     |
| TCGA-80-5607-01   | Diploid | Diploid | Diploid | Diploid | Diploid | Diploid |
| TCGA-50-5045-01   | Diploid | Diploid | Diploid | Diploid | Diploid | Diploid |
| TCGA-78-8655-01   | Diploid | Diploid | Diploid | Diploid | CNV     | CNV     |
| TCGA-05-4434-01   | Diploid | Diploid | Diploid | Diploid | Diploid | Diploid |
| TCGA-44-A47F-01   | Diploid | CNV     | CNV     | Diploid | Diploid | Diploid |
| TCGA-MP-A4T4-01   | Diploid | Diploid | Diploid | Diploid | Diploid | Diploid |
| TCGA-86-6851-01   | CNV     | Diploid | Diploid | CNV     | Diploid | Diploid |





|                   |         |         |         |         |         |         |
|-------------------|---------|---------|---------|---------|---------|---------|
| TCGA-05-4418-01   | Diploid | CNV     | Diploid | Diploid | Diploid | Diploid |
| TCGA-50-5068-01   | Diploid | Diploid | Diploid | Diploid | Diploid | Diploid |
| TCGA-83-5908-01   | Diploid | Diploid | Diploid | Diploid | Diploid | Diploid |
| TCGA-50-6590-01   | Diploid | Diploid | CNV     | Diploid | Diploid | Diploid |
| TCGA-97-A4M1-01   | Diploid | CNV     | CNV     | Diploid | CNV     | Diploid |
| TCGA-93-7347-01   | Diploid | Diploid | Diploid | Diploid | Diploid | Diploid |
| TCGA-50-5049-01   | Diploid | Diploid | Diploid | Diploid | Diploid | Diploid |
| TCGA-55-6970-01   | Diploid | Diploid | CNV     | Diploid | Diploid | Diploid |
| TCGA-73-4668-01   | CNV     | CNV     | CNV     | CNV     | CNV     | CNV     |
| TCGA-50-8457-01   | Diploid | Diploid | Diploid | Diploid | CNV     | Diploid |
| TCGA-55-6982-01   | Diploid | Diploid | Diploid | Diploid | Diploid | Diploid |
| TCGA-78-7146-01   | CNV     | CNV     | CNV     | CNV     | Diploid | Diploid |
| TCGA-38-4625-01   | Diploid | Diploid | Diploid | Diploid | Diploid | Diploid |
| TCGA-44-2659-01.1 | Diploid | Diploid | CNV     | Diploid | Diploid | Diploid |
| TCGA-75-7031-01   | CNV     | CNV     | Diploid | Diploid | Diploid | Diploid |
| TCGA-05-4430-01   | Diploid | Diploid | Diploid | Diploid | Diploid | Diploid |
| TCGA-50-5933-01   | Diploid | Diploid | Diploid | Diploid | Diploid | CNV     |
| TCGA-86-7701-01   | Diploid | Diploid | Diploid | Diploid | Diploid | Diploid |
| TCGA-NJ-A7XG-01   | Diploid | CNV     | CNV     | Diploid | CNV     | CNV     |
| TCGA-62-A46V-01   | CNV     | CNV     | Diploid | CNV     | CNV     | Diploid |
| TCGA-78-8660-01   | Diploid | Diploid | Diploid | Diploid | Diploid | Diploid |
| TCGA-MN-A4N1-01   | Diploid | Diploid | CNV     | Diploid | Diploid | Diploid |
| TCGA-50-5931-01   | CNV     | CNV     | Diploid | CNV     | Diploid | Diploid |
| TCGA-55-6985-01   | Diploid | Diploid | Diploid | Diploid | Diploid | Diploid |
| TCGA-44-A47B-01   | CNV     | Diploid | Diploid | CNV     | Diploid | CNV     |
| TCGA-MP-A4TJ-01   | Diploid | Diploid | Diploid | Diploid | Diploid | Diploid |
| TCGA-MP-A5C7-01   | Diploid | Diploid | CNV     | Diploid | NA      | Diploid |
| TCGA-78-7160-01   | Diploid | Diploid | Diploid | Diploid | Diploid | Diploid |
| TCGA-86-6562-01   | CNV     | Diploid | CNV     | CNV     | Diploid | Diploid |
| TCGA-44-7659-01   | Diploid | Diploid | CNV     | Diploid | Diploid | Diploid |
| TCGA-44-6144-01   | Diploid | CNV     | CNV     | Diploid | Diploid | Diploid |
| TCGA-38-4626-01   | Diploid | Diploid | Diploid | Diploid | Diploid | Diploid |
| TCGA-86-8074-01   | Diploid | Diploid | CNV     | Diploid | Diploid | Diploid |
| TCGA-4B-A93V-01   | CNV     | CNV     | CNV     | CNV     | CNV     | CNV     |
| TCGA-55-6543-01   | Diploid | Diploid | CNV     | Diploid | Diploid | Diploid |
| TCGA-44-6779-01   | CNV     | Diploid | Diploid | CNV     | CNV     | CNV     |
| TCGA-50-5941-01   | Diploid | Diploid | Diploid | Diploid | Diploid | Diploid |
| TCGA-95-8494-01   | CNV     | Diploid | CNV     | CNV     | Diploid | Diploid |
| TCGA-97-A4M0-01   | CNV     | Diploid | CNV     | Diploid | Diploid | CNV     |
| TCGA-MP-A4SY-01   | Diploid | Diploid | Diploid | Diploid | Diploid | Diploid |
| TCGA-49-4510-01   | CNV     | CNV     | Diploid | CNV     | Diploid | CNV     |
| TCGA-97-7937-01   | Diploid | Diploid | CNV     | Diploid | Diploid | CNV     |
| TCGA-67-6216-01   | Diploid | Diploid | Diploid | Diploid | Diploid | Diploid |
| TCGA-69-7978-01   | Diploid | Diploid | Diploid | Diploid | Diploid | Diploid |
| TCGA-55-A57B-01   | Diploid | CNV     | Diploid | Diploid | Diploid | Diploid |
| TCGA-44-6776-01   | Diploid | Diploid | Diploid | Diploid | Diploid | Diploid |
| TCGA-95-7947-01   | Diploid | CNV     | Diploid | CNV     | CNV     | Diploid |
| TCGA-50-5944-01   | CNV     | CNV     | CNV     | CNV     | CNV     | Diploid |
| TCGA-78-7162-01   | Diploid | Diploid | Diploid | Diploid | Diploid | Diploid |
| TCGA-78-7155-01   | CNV     | Diploid | CNV     | CNV     | Diploid | CNV     |
| TCGA-05-5428-01   | Diploid | CNV     | CNV     | Diploid | CNV     | CNV     |
| TCGA-55-A492-01   | CNV     | CNV     | Diploid | Diploid | Diploid | Diploid |
| TCGA-L9-A5IP-01   | Diploid | Diploid | CNV     | Diploid | Diploid | Diploid |
| TCGA-91-6848-01   | Diploid | Diploid | Diploid | CNV     | Diploid | CNV     |
| TCGA-05-4395-01   | CNV     | Diploid | Diploid | CNV     | Diploid | Diploid |

|                   |         |         |         |         |         |         |
|-------------------|---------|---------|---------|---------|---------|---------|
| TCGA-99-8033-01   | Diploid | Diploid | Diploid | CNV     | Diploid | Diploid |
| TCGA-38-4625-01.1 | Diploid | Diploid | CNV     | Diploid | Diploid | CNV     |
| TCGA-78-8640-01   | CNV     | Diploid | Diploid | Diploid | Diploid | CNV     |
| TCGA-86-7713-01   | CNV     | CNV     | Diploid | CNV     | Diploid | Diploid |
| TCGA-55-8620-01   | CNV     | CNV     | CNV     | Diploid | Diploid | Diploid |
| TCGA-62-8395-01   | CNV     | Diploid | Diploid | CNV     | Diploid | Diploid |
| TCGA-55-7914-01   | Diploid | CNV     | Diploid | Diploid | Diploid | Diploid |
| TCGA-75-6212-01   | Diploid | Diploid | Diploid | Diploid | Diploid | Diploid |
| TCGA-49-6743-01   | CNV     | Diploid | CNV     | Diploid | Diploid | Diploid |
| TCGA-05-4410-01   | Diploid | Diploid | CNV     | Diploid | Diploid | Diploid |
| TCGA-55-5899-01   | CNV     | CNV     | CNV     | CNV     | CNV     | CNV     |
| TCGA-95-A4VN-01   | Diploid | Diploid | Diploid | Diploid | Diploid | Diploid |
| TCGA-44-2657-01   | Diploid | Diploid | Diploid | Diploid | Diploid | Diploid |
| TCGA-50-5942-01   | Diploid | Diploid | Diploid | Diploid | Diploid | Diploid |
| TCGA-44-6775-01.2 | Diploid | Diploid | Diploid | Diploid | CNV     | CNV     |
| TCGA-38-4631-01   | CNV     | CNV     | CNV     | CNV     | Diploid | Diploid |
| TCGA-50-6673-01   | Diploid | CNV     | Diploid | Diploid | Diploid | Diploid |
| TCGA-78-7145-01   | CNV     | CNV     | Diploid | CNV     | Diploid | CNV     |
| TCGA-38-4629-01   | Diploid | Diploid | Diploid | CNV     | Diploid | Diploid |
| TCGA-05-5420-01   | Diploid | Diploid | Diploid | Diploid | Diploid | Diploid |
| TCGA-MP-A4TE-01   | Diploid | CNV     | CNV     | CNV     | Diploid | Diploid |
| TCGA-86-8669-01   | Diploid | Diploid | CNV     | Diploid | Diploid | CNV     |
| TCGA-50-5051-01   | CNV     | CNV     | CNV     | CNV     | Diploid | Diploid |
| TCGA-MP-A4T8-01   | Diploid | Diploid | CNV     | CNV     | Diploid | CNV     |
| TCGA-73-4659-01   | CNV     | Diploid | Diploid | CNV     | Diploid | Diploid |
| TCGA-55-6971-01   | Diploid | Diploid | Diploid | Diploid | Diploid | Diploid |
| TCGA-MP-A4T6-01   | CNV     | CNV     | CNV     | CNV     | CNV     | CNV     |
| TCGA-93-A4JP-01   | Diploid | Diploid | Diploid | Diploid | CNV     | Diploid |
| TCGA-55-7281-01   | Diploid | Diploid | CNV     | Diploid | CNV     | CNV     |
| TCGA-75-6205-01   | Diploid | Diploid | Diploid | Diploid | Diploid | Diploid |
| TCGA-97-7938-01   | CNV     | Diploid | Diploid | CNV     | Diploid | Diploid |
| TCGA-05-4427-01   | Diploid | CNV     | CNV     | Diploid | CNV     | CNV     |
| TCGA-78-7154-01   | CNV     | Diploid | Diploid | CNV     | CNV     | CNV     |
| TCGA-55-6979-01   | Diploid | Diploid | Diploid | Diploid | Diploid | Diploid |
| TCGA-86-7955-01   | Diploid | CNV     | CNV     | CNV     | CNV     | Diploid |
| TCGA-55-8621-01   | Diploid | Diploid | Diploid | Diploid | Diploid | Diploid |
| TCGA-86-8673-01   | Diploid | Diploid | Diploid | CNV     | Diploid | CNV     |
| TCGA-86-A456-01   | Diploid | Diploid | Diploid | Diploid | Diploid | Diploid |
| TCGA-NJ-A55A-01   | Diploid | Diploid | Diploid | Diploid | Diploid | Diploid |
| TCGA-05-4398-01   | Diploid | Diploid | Diploid | CNV     | Diploid | Diploid |
| TCGA-55-8301-01   | Diploid | Diploid | Diploid | Diploid | Diploid | Diploid |
| TCGA-64-5779-01   | CNV     | CNV     | CNV     | CNV     | CNV     | CNV     |
| TCGA-97-A4M5-01   | Diploid | Diploid | Diploid | Diploid | Diploid | Diploid |
| TCGA-95-7567-01   | Diploid | Diploid | CNV     | Diploid | CNV     | Diploid |
| TCGA-55-8513-01   | Diploid | Diploid | Diploid | Diploid | Diploid | Diploid |
| TCGA-44-3917-01.1 | CNV     | CNV     | CNV     | CNV     | CNV     | Diploid |
| TCGA-38-4627-01.1 | Diploid | Diploid | Diploid | Diploid | Diploid | Diploid |
| TCGA-64-5781-01   | Diploid | Diploid | Diploid | Diploid | Diploid | Diploid |
| TCGA-J2-A4AD-01   | CNV     | CNV     | CNV     | CNV     | Diploid | Diploid |
| TCGA-49-4514-01   | Diploid | Diploid | Diploid | Diploid | CNV     | Diploid |
| TCGA-95-7039-01   | Diploid | CNV     | Diploid | Diploid | Diploid | CNV     |
| TCGA-78-7152-01   | Diploid | Diploid | Diploid | Diploid | CNV     | CNV     |
| TCGA-55-7995-01   | Diploid | Diploid | Diploid | Diploid | CNV     | Diploid |
| TCGA-35-5375-01   | CNV     | Diploid | Diploid | CNV     | Diploid | Diploid |
| TCGA-86-8073-01   | Diploid | Diploid | CNV     | CNV     | CNV     | CNV     |

|                   |         |         |         |         |         |         |
|-------------------|---------|---------|---------|---------|---------|---------|
| TCGA-97-8171-01   | Diploid | Diploid | Diploid | Diploid | Diploid | CNV     |
| TCGA-75-5126-01   | Diploid | Diploid | Diploid | Diploid | Diploid | Diploid |
| TCGA-05-4425-01   | CNV     | Diploid | Diploid | CNV     | Diploid | Diploid |
| TCGA-75-7027-01   | CNV     | CNV     | CNV     | CNV     | Diploid | CNV     |
| TCGA-55-7728-01   | Diploid | Diploid | Diploid | Diploid | Diploid | Diploid |
| TCGA-67-4679-01   | Diploid | Diploid | Diploid | Diploid | CNV     | Diploid |
| TCGA-62-A46S-01   | Diploid | Diploid | Diploid | Diploid | CNV     | Diploid |
| TCGA-55-8302-01   | CNV     | CNV     | CNV     | CNV     | Diploid | CNV     |
| TCGA-67-3770-01   | CNV     | CNV     | CNV     | CNV     | CNV     | CNV     |
| TCGA-86-8668-01   | Diploid | CNV     | Diploid | Diploid | CNV     | CNV     |
| TCGA-78-7163-01   | Diploid | Diploid | CNV     | Diploid | CNV     | CNV     |
| TCGA-55-6972-01   | Diploid | Diploid | CNV     | Diploid | Diploid | Diploid |
| TCGA-44-2661-01   | Diploid | Diploid | Diploid | Diploid | Diploid | Diploid |
| TCGA-44-2668-01.2 | Diploid | Diploid | Diploid | Diploid | Diploid | Diploid |
| TCGA-69-A59K-01   | CNV     | CNV     | Diploid | CNV     | CNV     | CNV     |
| TCGA-97-8175-01   | Diploid | Diploid | Diploid | Diploid | Diploid | CNV     |
| TCGA-49-AARN-01   | Diploid | Diploid | Diploid | CNV     | Diploid | CNV     |
| TCGA-O1-A52J-01   | CNV     | CNV     | CNV     | CNV     | CNV     | CNV     |
| TCGA-64-5778-01   | Diploid | Diploid | Diploid | CNV     | Diploid | Diploid |
| TCGA-97-7546-01   | Diploid | Diploid | Diploid | CNV     | CNV     | CNV     |
| TCGA-44-7661-01   | Diploid | Diploid | Diploid | Diploid | Diploid | Diploid |
| TCGA-44-2656-01.3 | CNV     | Diploid | CNV     | CNV     | Diploid | Diploid |
| TCGA-62-A46Y-01   | Diploid | Diploid | Diploid | Diploid | Diploid | Diploid |
| TCGA-44-5645-01.2 | Diploid | Diploid | CNV     | Diploid | Diploid | Diploid |
| TCGA-75-6206-01   | CNV     | Diploid | Diploid | CNV     | CNV     | CNV     |
| TCGA-55-8203-01   | Diploid | Diploid | Diploid | Diploid | Diploid | Diploid |
| TCGA-44-2668-01.3 | Diploid | Diploid | Diploid | Diploid | Diploid | Diploid |
| TCGA-78-7633-01   | Diploid | CNV     | CNV     | Diploid | Diploid | Diploid |
| TCGA-05-4405-01   | Diploid | Diploid | CNV     | CNV     | Diploid | Diploid |
| TCGA-44-3918-01.1 | Diploid | Diploid | Diploid | Diploid | Diploid | CNV     |
| TCGA-78-7158-01   | Diploid | Diploid | Diploid | Diploid | Diploid | Diploid |
| TCGA-NJ-A55R-01   | Diploid | Diploid | Diploid | Diploid | CNV     | Diploid |
| TCGA-55-A490-01   | Diploid | Diploid | Diploid | CNV     | CNV     | CNV     |
| TCGA-05-4390-01   | Diploid | CNV     | Diploid | Diploid | CNV     | Diploid |
| TCGA-55-A48Z-01   | CNV     | Diploid | Diploid | CNV     | Diploid | CNV     |
| TCGA-44-2662-01.3 | Diploid | Diploid | Diploid | CNV     | CNV     | Diploid |
| TCGA-44-3918-01.2 | Diploid | Diploid | Diploid | Diploid | Diploid | CNV     |
| TCGA-55-8094-01   | CNV     | CNV     | CNV     | CNV     | CNV     | Diploid |
| TCGA-S2-AA1A-01   | Diploid | Diploid | Diploid | Diploid | Diploid | Diploid |
| TCGA-75-7030-01   | Diploid | Diploid | Diploid | Diploid | Diploid | Diploid |
| TCGA-44-4112-01.2 | Diploid | Diploid | CNV     | Diploid | CNV     | CNV     |
| TCGA-44-5643-01   | CNV     | CNV     | CNV     | CNV     | CNV     | CNV     |
| TCGA-L9-A7SV-01   | CNV     | Diploid | CNV     | CNV     | CNV     | CNV     |
| TCGA-44-3919-01   | Diploid | Diploid | Diploid | CNV     | Diploid | CNV     |
| TCGA-55-8085-01   | Diploid | CNV     | Diploid | Diploid | Diploid | CNV     |
| TCGA-78-7149-01   | Diploid | CNV     | CNV     | Diploid | Diploid | Diploid |
| TCGA-49-AARE-01   | Diploid | Diploid | Diploid | Diploid | CNV     | CNV     |
| TCGA-55-8096-01   | Diploid | CNV     | Diploid | Diploid | CNV     | Diploid |
| TCGA-44-2665-01.2 | Diploid | Diploid | Diploid | Diploid | Diploid | Diploid |
| TCGA-80-5608-01   | Diploid | CNV     | Diploid | Diploid | Diploid | Diploid |
| TCGA-55-8089-01   | Diploid | Diploid | Diploid | Diploid | Diploid | CNV     |
| TCGA-97-8552-01   | CNV     | CNV     | CNV     | CNV     | CNV     | CNV     |
| TCGA-55-7815-01   | CNV     | Diploid | Diploid | CNV     | Diploid | Diploid |
| TCGA-35-4122-01   | Diploid | Diploid | Diploid | Diploid | Diploid | Diploid |
| TCGA-44-6146-01.1 | Diploid | Diploid | CNV     | Diploid | Diploid | Diploid |

|                   |         |         |         |         |         |         |
|-------------------|---------|---------|---------|---------|---------|---------|
| TCGA-55-8512-01   | Diploid | CNV     | Diploid | Diploid | CNV     | Diploid |
| TCGA-62-A471-01   | CNV     | Diploid | CNV     | CNV     | CNV     | CNV     |
| TCGA-49-4507-01   | Diploid | Diploid | Diploid | CNV     | CNV     | Diploid |
| TCGA-97-7547-01   | Diploid | Diploid | Diploid | Diploid | CNV     | Diploid |
| TCGA-55-7227-01   | Diploid | Diploid | Diploid | Diploid | Diploid | CNV     |
| TCGA-50-8459-01   | Diploid | Diploid | Diploid | Diploid | Diploid | Diploid |
| TCGA-78-7143-01   | Diploid | Diploid | Diploid | CNV     | CNV     | CNV     |
| TCGA-97-7554-01   | CNV     | Diploid | Diploid | CNV     | Diploid | Diploid |
| TCGA-69-7763-01   | Diploid | Diploid | Diploid | Diploid | Diploid | Diploid |
| TCGA-99-8032-01   | Diploid | Diploid | Diploid | Diploid | Diploid | Diploid |
| TCGA-86-8279-01   | CNV     | CNV     | CNV     | CNV     | CNV     | Diploid |
| TCGA-55-8205-01   | Diploid | Diploid | Diploid | Diploid | Diploid | CNV     |
| TCGA-MP-A4TF-01   | CNV     | Diploid | CNV     | CNV     | CNV     | Diploid |
| TCGA-55-7576-01   | CNV     | Diploid | CNV     | CNV     | Diploid | CNV     |
| TCGA-MN-A4N4-01   | CNV     | Diploid | CNV     | Diploid | CNV     | CNV     |
| TCGA-44-2657-01.1 | Diploid | Diploid | Diploid | Diploid | Diploid | Diploid |
| TCGA-49-4490-01   | Diploid | CNV     | CNV     | Diploid | CNV     | Diploid |
| TCGA-44-6146-01.2 | Diploid | Diploid | CNV     | Diploid | Diploid | Diploid |
| TCGA-50-5936-01   | CNV     | CNV     | Diploid | CNV     | Diploid | CNV     |
| TCGA-97-7941-01   | Diploid | Diploid | Diploid | Diploid | Diploid | Diploid |
| TCGA-64-5775-01   | CNV     | Diploid | Diploid | Diploid | CNV     | Diploid |
| TCGA-MP-A4SV-01   | Diploid | Diploid | Diploid | Diploid | Diploid | Diploid |
| TCGA-78-7167-01   | Diploid | Diploid | CNV     | Diploid | Diploid | Diploid |
| TCGA-97-7552-01   | Diploid | Diploid | Diploid | Diploid | Diploid | Diploid |
| TCGA-05-4422-01   | Diploid | Diploid | Diploid | Diploid | Diploid | Diploid |
| TCGA-55-7913-01   | Diploid | Diploid | Diploid | Diploid | Diploid | Diploid |
| TCGA-38-A44F-01   | Diploid | Diploid | Diploid | Diploid | Diploid | Diploid |
| TCGA-49-4512-01   | CNV     | Diploid | CNV     | CNV     | CNV     | CNV     |
| TCGA-05-4402-01   | CNV     | CNV     | Diploid | CNV     | Diploid | CNV     |
| TCGA-78-7535-01   | Diploid | Diploid | CNV     | Diploid | CNV     | CNV     |
| TCGA-44-2666-01.2 | Diploid | Diploid | Diploid | Diploid | Diploid | Diploid |
| TCGA-62-8394-01   | CNV     | CNV     | Diploid | CNV     | Diploid | CNV     |
| TCGA-50-5930-01   | Diploid | Diploid | Diploid | Diploid | Diploid | Diploid |
| TCGA-35-3615-01   | Diploid | Diploid | CNV     | Diploid | Diploid | Diploid |
| TCGA-69-7979-01   | CNV     | Diploid | CNV     | CNV     | CNV     | CNV     |
| TCGA-50-7109-01   | CNV     | CNV     | CNV     | CNV     | Diploid | Diploid |
| TCGA-49-AAQV-01   | CNV     | Diploid | Diploid | CNV     | Diploid | CNV     |
| TCGA-44-2665-01.3 | Diploid | Diploid | CNV     | Diploid | CNV     | CNV     |
| TCGA-64-1679-01   | Diploid | Diploid | CNV     | Diploid | CNV     | Diploid |
| TCGA-69-7974-01   | Diploid | Diploid | Diploid | Diploid | Diploid | Diploid |
| TCGA-38-4626-01.1 | Diploid | Diploid | Diploid | Diploid | Diploid | Diploid |
| TCGA-55-1596-01   | CNV     | CNV     | CNV     | CNV     | Diploid | Diploid |
| TCGA-55-8514-01   | CNV     | CNV     | CNV     | CNV     | Diploid | CNV     |
| TCGA-05-4420-01   | Diploid | Diploid | CNV     | Diploid | CNV     | CNV     |
| TCGA-55-8508-01   | Diploid | CNV     | Diploid | Diploid | Diploid | Diploid |
| TCGA-55-8090-01   | Diploid | Diploid | Diploid | Diploid | Diploid | Diploid |
| TCGA-69-7973-01   | Diploid | CNV     | Diploid | Diploid | CNV     | Diploid |
| TCGA-NJ-A4YP-01   | Diploid | Diploid | Diploid | Diploid | CNV     | CNV     |
| TCGA-55-7907-01   | Diploid | CNV     | CNV     | Diploid | Diploid | Diploid |
| TCGA-44-2655-01.1 | CNV     | Diploid | Diploid | Diploid | Diploid | Diploid |
| TCGA-55-8208-01   | Diploid | Diploid | Diploid | Diploid | CNV     | CNV     |
| TCGA-95-7944-01   | Diploid | Diploid | Diploid | Diploid | Diploid | Diploid |
| TCGA-78-7153-01   | Diploid | Diploid | Diploid | Diploid | Diploid | Diploid |
| TCGA-55-A493-01   | Diploid | Diploid | Diploid | Diploid | Diploid | Diploid |
| TCGA-95-8039-01   | CNV     | CNV     | Diploid | CNV     | Diploid | CNV     |

|                   |         |         |         |         |         |         |
|-------------------|---------|---------|---------|---------|---------|---------|
| TCGA-44-2661-01.1 | Diploid | Diploid | Diploid | Diploid | Diploid | Diploid |
| TCGA-55-8091-01   | CNV     | CNV     | CNV     | CNV     | Diploid | CNV     |
| TCGA-64-5774-01   | Diploid | CNV     | CNV     | CNV     | CNV     | CNV     |
| TCGA-49-6744-01   | Diploid | Diploid | Diploid | Diploid | Diploid | CNV     |
| TCGA-73-4670-01   | Diploid | CNV     | CNV     | Diploid | Diploid | Diploid |
| TCGA-55-A4DG-01   | Diploid | CNV     | CNV     | Diploid | Diploid | Diploid |
| TCGA-73-4677-11   | Diploid | Diploid | Diploid | Diploid | Diploid | Diploid |
| TCGA-50-6594-11   | Diploid | Diploid | Diploid | Diploid | Diploid | Diploid |
| TCGA-49-4487-11   | Diploid | Diploid | Diploid | Diploid | Diploid | Diploid |
| TCGA-49-4510-11   | Diploid | Diploid | Diploid | Diploid | Diploid | Diploid |
| TCGA-78-7540-11   | Diploid | Diploid | Diploid | Diploid | Diploid | Diploid |
| TCGA-J2-8192-11   | Diploid | Diploid | Diploid | Diploid | Diploid | Diploid |
| TCGA-78-7162-11   | Diploid | Diploid | Diploid | Diploid | Diploid | Diploid |
| TCGA-55-1594-11   | Diploid | Diploid | Diploid | Diploid | Diploid | Diploid |
| TCGA-49-4486-11   | Diploid | Diploid | Diploid | Diploid | Diploid | Diploid |
| TCGA-49-4494-11   | Diploid | Diploid | Diploid | Diploid | Diploid | Diploid |
| TCGA-38-4627-11   | Diploid | Diploid | Diploid | Diploid | Diploid | Diploid |
| TCGA-55-7728-11   | Diploid | Diploid | Diploid | Diploid | Diploid | Diploid |
| TCGA-55-8096-11   | Diploid | Diploid | Diploid | Diploid | Diploid | Diploid |
| TCGA-44-2668-11   | Diploid | Diploid | Diploid | Diploid | Diploid | Diploid |
| TCGA-55-7911-11   | Diploid | Diploid | Diploid | Diploid | Diploid | Diploid |
| TCGA-55-7725-11   | Diploid | Diploid | Diploid | Diploid | Diploid | Diploid |
| TCGA-38-4629-11   | Diploid | Diploid | Diploid | Diploid | Diploid | Diploid |
| TCGA-49-AAR9-11   | Diploid | Diploid | Diploid | Diploid | Diploid | Diploid |
| TCGA-55-8085-11   | Diploid | Diploid | Diploid | Diploid | Diploid | Diploid |
| TCGA-44-5644-11   | Diploid | Diploid | Diploid | Diploid | Diploid | Diploid |
| TCGA-55-7995-11   | Diploid | Diploid | Diploid | Diploid | Diploid | Diploid |
| TCGA-99-8033-11   | Diploid | Diploid | Diploid | Diploid | Diploid | Diploid |
| TCGA-44-7660-11   | Diploid | Diploid | Diploid | Diploid | Diploid | Diploid |
| TCGA-55-7574-11   | Diploid | Diploid | Diploid | Diploid | Diploid | Diploid |
| TCGA-44-7659-11   | Diploid | Diploid | Diploid | Diploid | Diploid | Diploid |
| TCGA-44-2661-11   | Diploid | Diploid | Diploid | Diploid | Diploid | Diploid |
| TCGA-44-6775-11   | Diploid | Diploid | CNV     | Diploid | Diploid | Diploid |
| TCGA-55-8206-11   | Diploid | Diploid | Diploid | Diploid | Diploid | Diploid |
| TCGA-55-7914-11   | Diploid | Diploid | Diploid | Diploid | Diploid | Diploid |
| TCGA-91-6848-11   | Diploid | Diploid | Diploid | Diploid | Diploid | Diploid |
| TCGA-49-6767-11   | Diploid | Diploid | Diploid | Diploid | Diploid | Diploid |
| TCGA-55-6982-11   | Diploid | Diploid | Diploid | Diploid | Diploid | Diploid |
| TCGA-49-6761-11   | Diploid | Diploid | Diploid | Diploid | Diploid | Diploid |
| TCGA-99-8028-11   | Diploid | Diploid | Diploid | Diploid | Diploid | Diploid |
| TCGA-49-4507-11   | Diploid | Diploid | Diploid | Diploid | Diploid | Diploid |
| TCGA-55-7573-11   | Diploid | Diploid | Diploid | Diploid | Diploid | Diploid |
| TCGA-49-6745-11   | Diploid | Diploid | Diploid | Diploid | Diploid | Diploid |
| TCGA-44-2657-11   | Diploid | Diploid | Diploid | Diploid | Diploid | Diploid |
| TCGA-55-7570-11   | Diploid | Diploid | Diploid | Diploid | Diploid | Diploid |
| TCGA-38-4631-11   | Diploid | Diploid | Diploid | Diploid | Diploid | Diploid |
| TCGA-44-6146-11   | Diploid | Diploid | Diploid | Diploid | Diploid | Diploid |
| TCGA-44-5645-11   | Diploid | Diploid | Diploid | Diploid | Diploid | Diploid |
| TCGA-50-5936-11   | Diploid | Diploid | Diploid | Diploid | Diploid | Diploid |
| TCGA-55-8203-11   | Diploid | Diploid | Diploid | Diploid | Diploid | Diploid |
| TCGA-44-7667-11   | Diploid | Diploid | Diploid | Diploid | Diploid | Diploid |
| TCGA-44-3919-11   | Diploid | Diploid | Diploid | Diploid | Diploid | Diploid |
| TCGA-44-7662-11   | Diploid | Diploid | Diploid | Diploid | Diploid | Diploid |
| TCGA-44-3398-11   | Diploid | Diploid | Diploid | Diploid | Diploid | Diploid |
| TCGA-55-7907-11   | Diploid | Diploid | Diploid | Diploid | Diploid | Diploid |



|                   |         |         |         |         |         |         |
|-------------------|---------|---------|---------|---------|---------|---------|
| TCGA-49-AAQV-11   | Diploid | Diploid | Diploid | Diploid | Diploid | Diploid |
| TCGA-38-4628-11   | Diploid | Diploid | Diploid | Diploid | Diploid | Diploid |
| TCGA-50-5933-11   | Diploid | Diploid | Diploid | Diploid | Diploid | Diploid |
| TCGA-55-6972-11   | Diploid | Diploid | Diploid | Diploid | Diploid | Diploid |
| TCGA-44-4112-11   | Diploid | Diploid | Diploid | Diploid | Diploid | Diploid |
| TCGA-99-8032-11   | Diploid | Diploid | Diploid | Diploid | Diploid | Diploid |
| TCGA-44-2662-11   | Diploid | Diploid | Diploid | Diploid | Diploid | Diploid |
| TCGA-55-8207-11   | Diploid | Diploid | Diploid | Diploid | Diploid | Diploid |
| TCGA-55-7994-11   | Diploid | Diploid | Diploid | Diploid | Diploid | Diploid |
| TCGA-73-4676-11   | Diploid | Diploid | Diploid | Diploid | Diploid | Diploid |
| TCGA-38-4630-11   | Diploid | Diploid | Diploid | Diploid | Diploid | CNV     |
| TCGA-73-4658-11   | Diploid | Diploid | Diploid | Diploid | Diploid | Diploid |
| TCGA-50-5932-11   | Diploid | Diploid | Diploid | Diploid | Diploid | Diploid |
| TCGA-49-6743-11   | Diploid | Diploid | Diploid | Diploid | Diploid | Diploid |
| TCGA-73-4668-11   | Diploid | Diploid | Diploid | Diploid | Diploid | Diploid |
| TCGA-55-6978-11   | Diploid | Diploid | Diploid | Diploid | Diploid | Diploid |
| TCGA-44-2661-11.1 | Diploid | Diploid | Diploid | Diploid | Diploid | Diploid |
| TCGA-44-6778-11   | Diploid | Diploid | Diploid | Diploid | Diploid | Diploid |
| TCGA-55-6971-11   | Diploid | Diploid | Diploid | Diploid | Diploid | Diploid |
| TCGA-55-6986-11   | Diploid | Diploid | Diploid | Diploid | Diploid | Diploid |
| TCGA-44-6147-11   | Diploid | Diploid | Diploid | Diploid | Diploid | Diploid |
| TCGA-55-8301-11   | Diploid | Diploid | Diploid | Diploid | Diploid | Diploid |
| TCGA-86-7954-11   | Diploid | Diploid | Diploid | Diploid | Diploid | Diploid |
| TCGA-55-8092-11   | Diploid | Diploid | Diploid | Diploid | Diploid | Diploid |
| TCGA-44-8120-11   | Diploid | Diploid | Diploid | Diploid | Diploid | Diploid |
| TCGA-55-6975-11   | Diploid | Diploid | Diploid | Diploid | Diploid | Diploid |
| TCGA-50-5939-11   | Diploid | Diploid | Diploid | Diploid | Diploid | Diploid |
| TCGA-55-6983-11   | Diploid | Diploid | Diploid | Diploid | Diploid | Diploid |
| TCGA-44-6777-11   | Diploid | Diploid | Diploid | Diploid | Diploid | Diploid |
| TCGA-44-5643-11   | Diploid | Diploid | Diploid | Diploid | Diploid | Diploid |
| TCGA-78-7167-11   | Diploid | Diploid | Diploid | Diploid | Diploid | Diploid |
| TCGA-50-6591-11   | Diploid | Diploid | Diploid | Diploid | Diploid | Diploid |
| TCGA-44-3398-11.1 | Diploid | Diploid | Diploid | Diploid | Diploid | Diploid |
| TCGA-55-7281-11   | Diploid | Diploid | Diploid | Diploid | Diploid | Diploid |
| TCGA-49-AAR3-11   | Diploid | Diploid | Diploid | Diploid | Diploid | Diploid |
| TCGA-91-6847-11   | Diploid | Diploid | Diploid | Diploid | Diploid | Diploid |
| TCGA-55-8204-11   | Diploid | Diploid | Diploid | Diploid | Diploid | Diploid |
| TCGA-49-AARO-11   | Diploid | Diploid | Diploid | Diploid | Diploid | CNV     |
| TCGA-55-6979-11   | Diploid | Diploid | Diploid | Diploid | Diploid | Diploid |
| TCGA-44-7672-11   | Diploid | Diploid | Diploid | Diploid | Diploid | Diploid |
| TCGA-50-5931-11   | Diploid | Diploid | Diploid | Diploid | Diploid | Diploid |
| TCGA-91-6829-11   | Diploid | Diploid | Diploid | Diploid | Diploid | Diploid |
| TCGA-55-7910-11   | Diploid | Diploid | Diploid | Diploid | Diploid | Diploid |
| TCGA-49-4512-11   | Diploid | Diploid | Diploid | Diploid | Diploid | Diploid |
| TCGA-50-6592-11   | Diploid | Diploid | Diploid | Diploid | Diploid | Diploid |
| TCGA-J2-8194-11   | Diploid | Diploid | Diploid | Diploid | Diploid | Diploid |
| TCGA-55-1596-11   | Diploid | Diploid | Diploid | Diploid | Diploid | Diploid |
| TCGA-91-6849-11   | Diploid | Diploid | Diploid | Diploid | Diploid | Diploid |
| TCGA-44-6145-11   | Diploid | Diploid | Diploid | Diploid | Diploid | Diploid |
| TCGA-49-4505-11   | Diploid | Diploid | Diploid | Diploid | Diploid | Diploid |
| TCGA-05-5420-11   | Diploid | Diploid | Diploid | Diploid | Diploid | Diploid |
| TCGA-49-AAR0-11   | Diploid | Diploid | Diploid | Diploid | Diploid | Diploid |
| TCGA-55-8091-11   | Diploid | Diploid | Diploid | Diploid | Diploid | Diploid |
| TCGA-50-7109-11   | Diploid | Diploid | Diploid | Diploid | Diploid | Diploid |
| TCGA-55-1592-11   | Diploid | Diploid | Diploid | Diploid | Diploid | Diploid |



|                 |         |         |         |         |         |         |
|-----------------|---------|---------|---------|---------|---------|---------|
| TCGA-49-4514-11 | Diploid | Diploid | Diploid | Diploid | Diploid | Diploid |
| TCGA-55-8205-11 | Diploid | Diploid | Diploid | Diploid | Diploid | Diploid |
| TCGA-55-8097-11 | Diploid | Diploid | Diploid | Diploid | Diploid | Diploid |
| TCGA-44-7671-11 | Diploid | Diploid | Diploid | Diploid | Diploid | Diploid |
| TCGA-49-AARE-11 | Diploid | Diploid | Diploid | Diploid | Diploid | Diploid |
| TCGA-49-4490-11 | Diploid | Diploid | Diploid | Diploid | Diploid | Diploid |
| TCGA-55-6985-11 | Diploid | Diploid | Diploid | Diploid | Diploid | Diploid |
| TCGA-55-6970-11 | Diploid | Diploid | Diploid | Diploid | Diploid | Diploid |
| TCGA-73-4670-11 | Diploid | Diploid | Diploid | Diploid | Diploid | Diploid |
| TCGA-55-8299-11 | Diploid | Diploid | Diploid | Diploid | Diploid | Diploid |
| TCGA-44-2665-11 | Diploid | Diploid | Diploid | Diploid | Diploid | Diploid |
| TCGA-38-4626-11 | Diploid | Diploid | Diploid | Diploid | Diploid | Diploid |
| TCGA-73-4659-11 | Diploid | Diploid | Diploid | Diploid | Diploid | Diploid |
| TCGA-55-7576-11 | Diploid | Diploid | Diploid | Diploid | Diploid | Diploid |
| TCGA-55-6987-11 | Diploid | Diploid | Diploid | Diploid | Diploid | Diploid |
| TCGA-91-6836-11 | Diploid | Diploid | Diploid | Diploid | Diploid | Diploid |
| TCGA-55-6969-11 | Diploid | Diploid | Diploid | Diploid | Diploid | Diploid |
| TCGA-44-7661-11 | Diploid | Diploid | Diploid | Diploid | Diploid | Diploid |
| TCGA-55-7815-11 | Diploid | Diploid | Diploid | Diploid | Diploid | Diploid |

---
