# Supplementary material for: [Retracted] Identifying a 6‐Gene Prognostic Signature for Lung Adenocarcinoma Based on Copy Number Variation and Gene Expression Data
Source: Hindawi journal article supplement (doi:10.1155/2022/6962163), 2022-01-01
Supplement: f10 [file 6962163.f10.pdf]

Supplementary Table 2. The gene expressions and CNV status of the six-gene in LUAD patients

| PatientID | sampleID     | group    | GOLM1    | HMMR     | CBFA2T3 | POSTN    | EFNB2    | TPSB2    |
|-----------|--------------|----------|----------|----------|---------|----------|----------|----------|
| Patient1  | P2-41-31-F6  | adjacent | Diploid  | CNV gain | Diploid | Diploid  | Diploid  | Diploid  |
| Patient2  | P2-41-31-A4  | adjacent | Diploid  | Diploid  | Diploid | Diploid  | Diploid  | Diploid  |
| Patient3  | P2-41-31-G5  | adjacent | Diploid  | CNV loss | Diploid | CNV loss | CNV loss | Diploid  |
| Patient4  | P2-41-31-C3  | adjacent | Diploid  | Diploid  | Diploid | Diploid  | Diploid  | Diploid  |
| Patient5  | P2-41-14-K2  | adjacent | CNV loss | Diploid  | Diploid | Diploid  | Diploid  | Diploid  |
| Patient6  | P2-41-14-A4  | adjacent | Diploid  | Diploid  | Diploid | Diploid  | CNV gain | Diploid  |
| Patient7  | P2-41-13-H6  | adjacent | Diploid  | CNV gain | Diploid | Diploid  | Diploid  | CNV gain |
| Patient8  | P2-41-13-K4  | adjacent | Diploid  | Diploid  | Diploid | Diploid  | Diploid  | Diploid  |
| Patient9  | P2-42-32-A6  | adjacent | Diploid  | Diploid  | Diploid | Diploid  | CNV gain | Diploid  |
| Patient10 | P2-42-31-H7  | adjacent | Diploid  | Diploid  | Diploid | Diploid  | Diploid  | CNV gain |
| Patient11 | P2-42-31-K5  | adjacent | Diploid  | Diploid  | Diploid | Diploid  | Diploid  | Diploid  |
| Patient12 | P2-42-31-E10 | adjacent | Diploid  | Diploid  | Diploid | Diploid  | Diploid  | Diploid  |
| Patient13 | P2-42-31-E1  | adjacent | Diploid  | Diploid  | Diploid | Diploid  | Diploid  | Diploid  |
| Patient14 | P2-41-33-C2  | adjacent | Diploid  | Diploid  | Diploid | Diploid  | Diploid  | Diploid  |
| Patient15 | P2-41-33-D1  | adjacent | Diploid  | Diploid  | Diploid | CNV loss | CNV loss | Diploid  |
| Patient16 | P2-41-33-D10 | adjacent | Diploid  | Diploid  | Diploid | Diploid  | CNV gain | CNV loss |
| Patient17 | P2-41-32-J5  | adjacent | Diploid  | Diploid  | Diploid | Diploid  | Diploid  | CNV loss |
| Patient18 | P2-41-32-B2  | adjacent | Diploid  | Diploid  | Diploid | Diploid  | Diploid  | Diploid  |
| Patient19 | P2-41-32-J1  | adjacent | Diploid  | Diploid  | Diploid | Diploid  | Diploid  | Diploid  |
| Patient20 | P2-41-32-K4  | adjacent | Diploid  | CNV gain | Diploid | Diploid  | Diploid  | Diploid  |
| Patient1  | P2-41-31-F3  | tumor    | Diploid  | CNV gain | Diploid | Diploid  | Diploid  | Diploid  |
| Patient2  | P2-41-31-A1  | tumor    | Diploid  | Diploid  | Diploid | Diploid  | Diploid  | Diploid  |
| Patient3  | P2-41-31-G2  | tumor    | Diploid  | CNV loss | Diploid | CNV loss | CNV loss | Diploid  |
| Patient4  | P2-41-31-B10 | tumor    | Diploid  | Diploid  | Diploid | Diploid  | Diploid  | Diploid  |
| Patient5  | P2-41-14-J9  | tumor    | CNV loss | Diploid  | Diploid | Diploid  | Diploid  | Diploid  |
| Patient6  | P2-41-14-A1  | tumor    | Diploid  | Diploid  | Diploid | Diploid  | CNV gain | Diploid  |
| Patient7  | P2-41-13-H3  | tumor    | Diploid  | CNV gain | Diploid | Diploid  | Diploid  | CNV gain |
| Patient8  | P2-41-13-K1  | tumor    | Diploid  | Diploid  | Diploid | Diploid  | Diploid  | Diploid  |
| Patient9  | P2-42-32-A3  | tumor    | Diploid  | Diploid  | Diploid | Diploid  | CNV gain | Diploid  |
| Patient10 | P2-42-31-H6  | tumor    | Diploid  | Diploid  | Diploid | Diploid  | Diploid  | CNV gain |
| Patient11 | P2-42-31-K4  | tumor    | Diploid  | Diploid  | Diploid | Diploid  | Diploid  | Diploid  |
| Patient12 | P2-42-31-E7  | tumor    | Diploid  | Diploid  | Diploid | Diploid  | Diploid  | Diploid  |
| Patient13 | P2-42-31-D8  | tumor    | Diploid  | Diploid  | Diploid | Diploid  | Diploid  | Diploid  |
| Patient14 | P2-41-33-B9  | tumor    | Diploid  | Diploid  | Diploid | Diploid  | Diploid  | Diploid  |
| Patient15 | P2-41-33-C8  | tumor    | Diploid  | Diploid  | Diploid | CNV loss | CNV loss | Diploid  |
| Patient16 | P2-41-33-D7  | tumor    | Diploid  | Diploid  | Diploid | Diploid  | CNV gain | CNV loss |
| Patient17 | P2-41-32-J2  | tumor    | Diploid  | Diploid  | Diploid | Diploid  | Diploid  | CNV loss |
| Patient18 | P2-41-32-A10 | tumor    | Diploid  | Diploid  | Diploid | Diploid  | Diploid  | Diploid  |
| Patient19 | P2-41-32-H8  | tumor    | Diploid  | Diploid  | Diploid | Diploid  | Diploid  | Diploid  |
| Patient20 | P2-41-32-K1  | tumor    | Diploid  | CNV gain | Diploid | Diploid  | Diploid  | Diploid  |

Supplementary Table 2. The gene expressions and CNV status of the six-gene in LUAD patients

| PatientID | sampleID     | group    | GOLM1   | HMMR    | CBFA2T3 | POSTN   | EFNB2   | TPSB2   |
|-----------|--------------|----------|---------|---------|---------|---------|---------|---------|
| Patient1  | P2-41-31-F6  | adjacent | 7.37915 | 0.26218 | 10.1782 | 33.4093 | 13.6214 | 42.0096 |
| Patient2  | P2-41-31-A4  | adjacent | 1.99986 | 0       | 4.26835 | 5.63387 | 4.67713 | 3.40508 |
| Patient3  | P2-41-31-G5  | adjacent | 1.21086 | 0       | 1.1254  | 0.53861 | 0.98371 | 2.83436 |
| Patient4  | P2-41-31-C3  | adjacent | 3.32482 | 0.0175  | 12.4439 | 0.14273 | 7.65242 | 2.27743 |
| Patient5  | P2-41-14-K2  | adjacent | 2.41652 | 0       | 9.14183 | 12.4353 | 10.3612 | 8.51278 |
| Patient6  | P2-41-14-A4  | adjacent | 5.26212 | 0.06626 | 3.96032 | 8.17389 | 7.5242  | 13.3749 |
| Patient7  | P2-41-13-H6  | adjacent | 2.45794 | 0.22715 | 7.14626 | 2.15223 | 5.06995 | 3.30025 |
| Patient8  | P2-41-13-K4  | adjacent | 3.36311 | 0.0984  | 13.8734 | 19.8627 | 14.7129 | 10.9763 |
| Patient9  | P2-42-32-A6  | adjacent | 8.60317 | 0.83094 | 2.6104  | 17.1113 | 9.25933 | 16.7717 |
| Patient10 | P2-42-31-H7  | adjacent | 1.50735 | 0       | 2.58523 | 0.63696 | 1.14572 | 4.64626 |
| Patient11 | P2-42-31-K5  | adjacent | 6.18098 | 0.21204 | 7.39219 | 33.2882 | 23.0293 | 10.9809 |
| Patient12 | P2-42-31-E10 | adjacent | 44.7881 | 0.26522 | 1.28703 | 17.3039 | 4.05272 | 10.5654 |
| Patient13 | P2-42-31-E1  | adjacent | 6.90667 | 0.32719 | 4.51257 | 10.34   | 17.422  | 18.8996 |
| Patient14 | P2-41-33-C2  | adjacent | 3.00676 | 0.18129 | 3.12535 | 4.80505 | 3.70777 | 1.6851  |
| Patient15 | P2-41-33-D1  | adjacent | 5.77888 | 0       | 3.38058 | 24.6016 | 21.6872 | 4.79349 |
| Patient16 | P2-41-33-D10 | adjacent | 5.33499 | 0       | 5.75281 | 8.3798  | 7.16672 | 6.532   |
| Patient17 | P2-41-32-J5  | adjacent | 0       | 0       | 0       | 0       | 0       | 0       |
| Patient18 | P2-41-32-B2  | adjacent | 2.72271 | 0       | 4.28917 | 17.9483 | 9.70009 | 1.59857 |
| Patient19 | P2-41-32-J1  | adjacent | 3.31253 | 0.18164 | 5.10965 | 2.59234 | 2.90974 | 1.55053 |
| Patient20 | P2-41-32-K4  | adjacent | 2.58148 | 0.42802 | 3.82619 | 2.61806 | 9.65981 | 2.65239 |
| Patient1  | P2-41-31-F3  | tumor    | 18.1018 | 0.13702 | 2.99962 | 0.47891 | 4.29334 | 0.41588 |
| Patient2  | P2-41-31-A1  | tumor    | 0.58077 | 0       | 2.47171 | 0.92276 | 1.10019 | 0.61377 |
| Patient3  | P2-41-31-G2  | tumor    | 35.8373 | 3.20938 | 0.6415  | 28.379  | 23.1267 | 19.0851 |
| Patient4  | P2-41-31-B10 | tumor    | 45.503  | 1.26094 | 1.15939 | 13.3687 | 20.0092 | 18.7532 |
| Patient5  | P2-41-14-J9  | tumor    | 8.47152 | 1.33069 | 1.16526 | 17.1185 | 1.87698 | 0       |
| Patient6  | P2-41-14-A1  | tumor    | 11.9399 | 0       | 3.41299 | 10.2591 | 4.65404 | 3.06697 |
| Patient7  | P2-41-13-H3  | tumor    | 13.1131 | 1.06528 | 3.091   | 28.752  | 2.94364 | 3.47848 |
| Patient8  | P2-41-13-K1  | tumor    | 3.26096 | 0.02846 | 15.8082 | 10.1536 | 11.6806 | 4.23225 |
| Patient9  | P2-42-32-A3  | tumor    | 9.89035 | 1.00547 | 3.46684 | 6.36972 | 7.14186 | 10.4905 |
| Patient10 | P2-42-31-H6  | tumor    | 59.6997 | 3.07474 | 2.66592 | 26.5609 | 5.42127 | 6.87652 |
| Patient11 | P2-42-31-K4  | tumor    | 19.1735 | 0.11354 | 3.3928  | 8.44937 | 1.92178 | 3.91992 |
| Patient12 | P2-42-31-E7  | tumor    | 31.8765 | 0.94819 | 5.08565 | 73.7854 | 4.34671 | 8.81368 |
| Patient13 | P2-42-31-D8  | tumor    | 7.75578 | 0       | 2.00095 | 0.96808 | 2.95401 | 4.23335 |
| Patient14 | P2-41-33-B9  | tumor    | 14.1465 | 0.9883  | 0.66638 | 13.3797 | 0.61337 | 0.52494 |
| Patient15 | P2-41-33-C8  | tumor    | 22.339  | 0.7096  | 2.58263 | 6.06667 | 4.17428 | 0.21415 |
| Patient16 | P2-41-33-D7  | tumor    | 5.9207  | 0.21144 | 4.1428  | 38.4293 | 3.77062 | 12.7549 |
| Patient17 | P2-41-32-J2  | tumor    | 0       | 0       | 0       | 0       | 0       | 0       |
| Patient18 | P2-41-32-A10 | tumor    | 14.8909 | 0       | 0       | 5.09687 | 6.26863 | 16.7206 |
| Patient19 | P2-41-32-H8  | tumor    | 0.93883 | 0.02809 | 1.71105 | 2.59867 | 2.02562 | 5.12873 |
| Patient20 | P2-41-32-K1  | tumor    | 69.4257 | 1.78889 | 1.43028 | 15.0651 | 10.5868 | 18.5906 |
