# Supplementary figures and images for: [Retracted] Identifying a 6‐Gene Prognostic Signature for Lung Adenocarcinoma Based on Copy Number Variation and Gene Expression Data
Source: Hindawi journal article supplement (doi:10.1155/2022/6962163), 2022-01-01

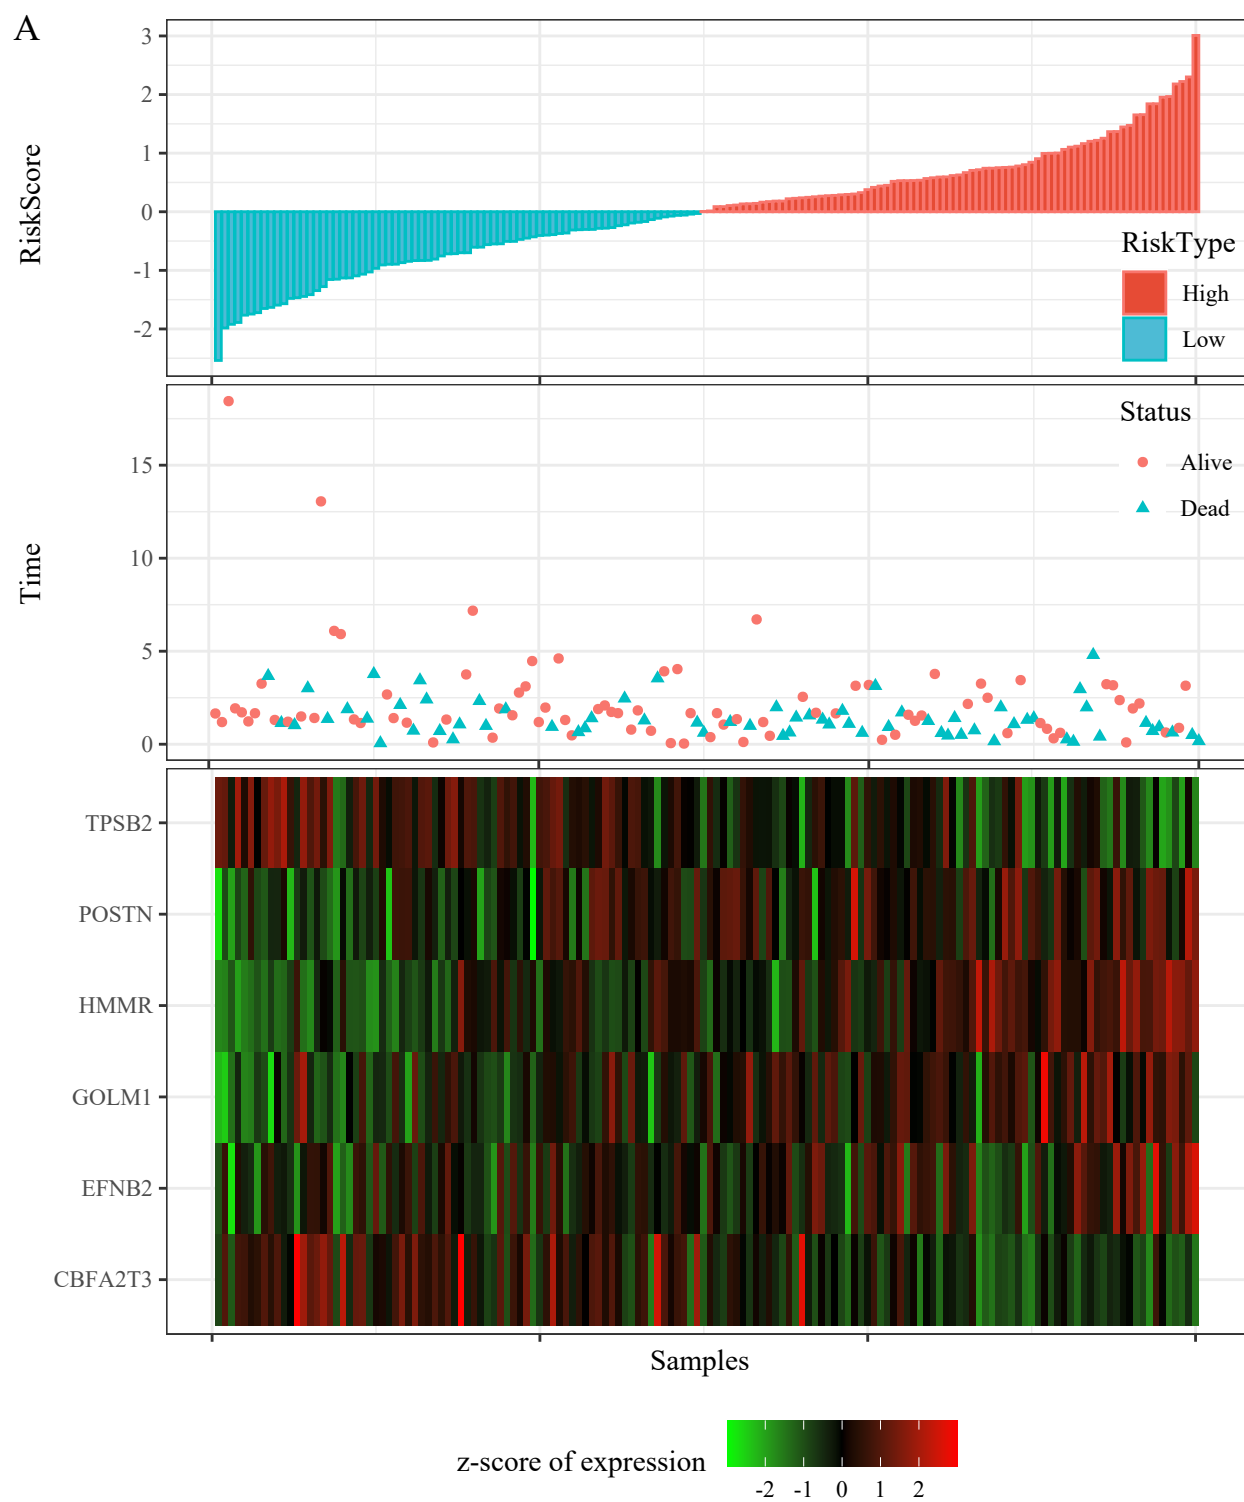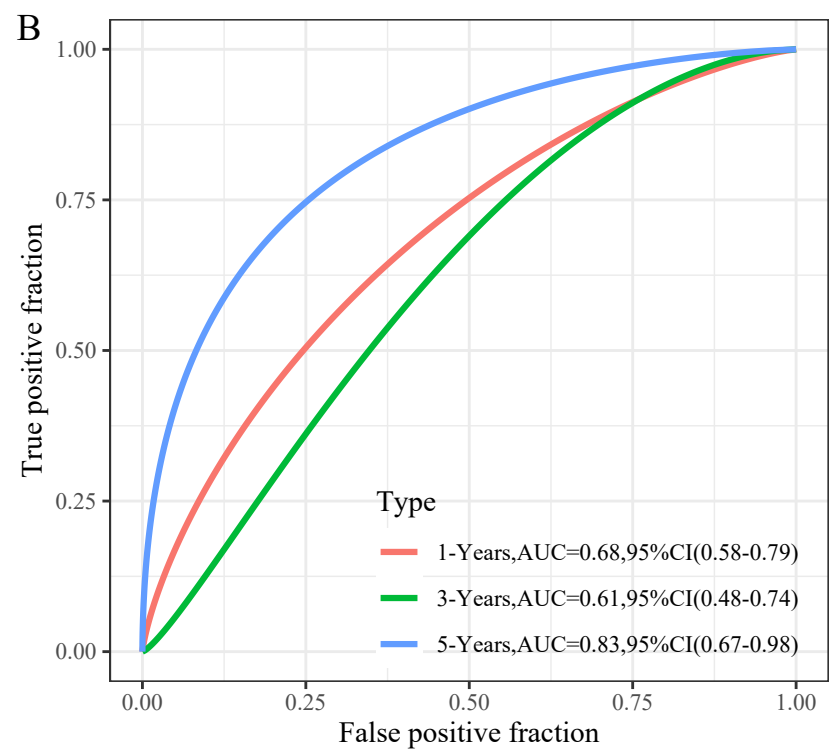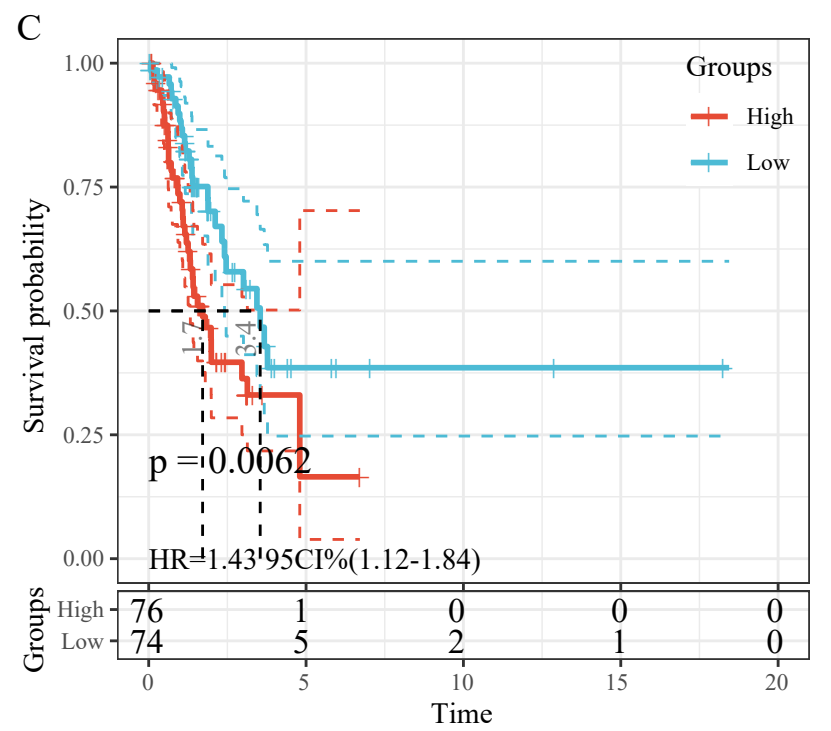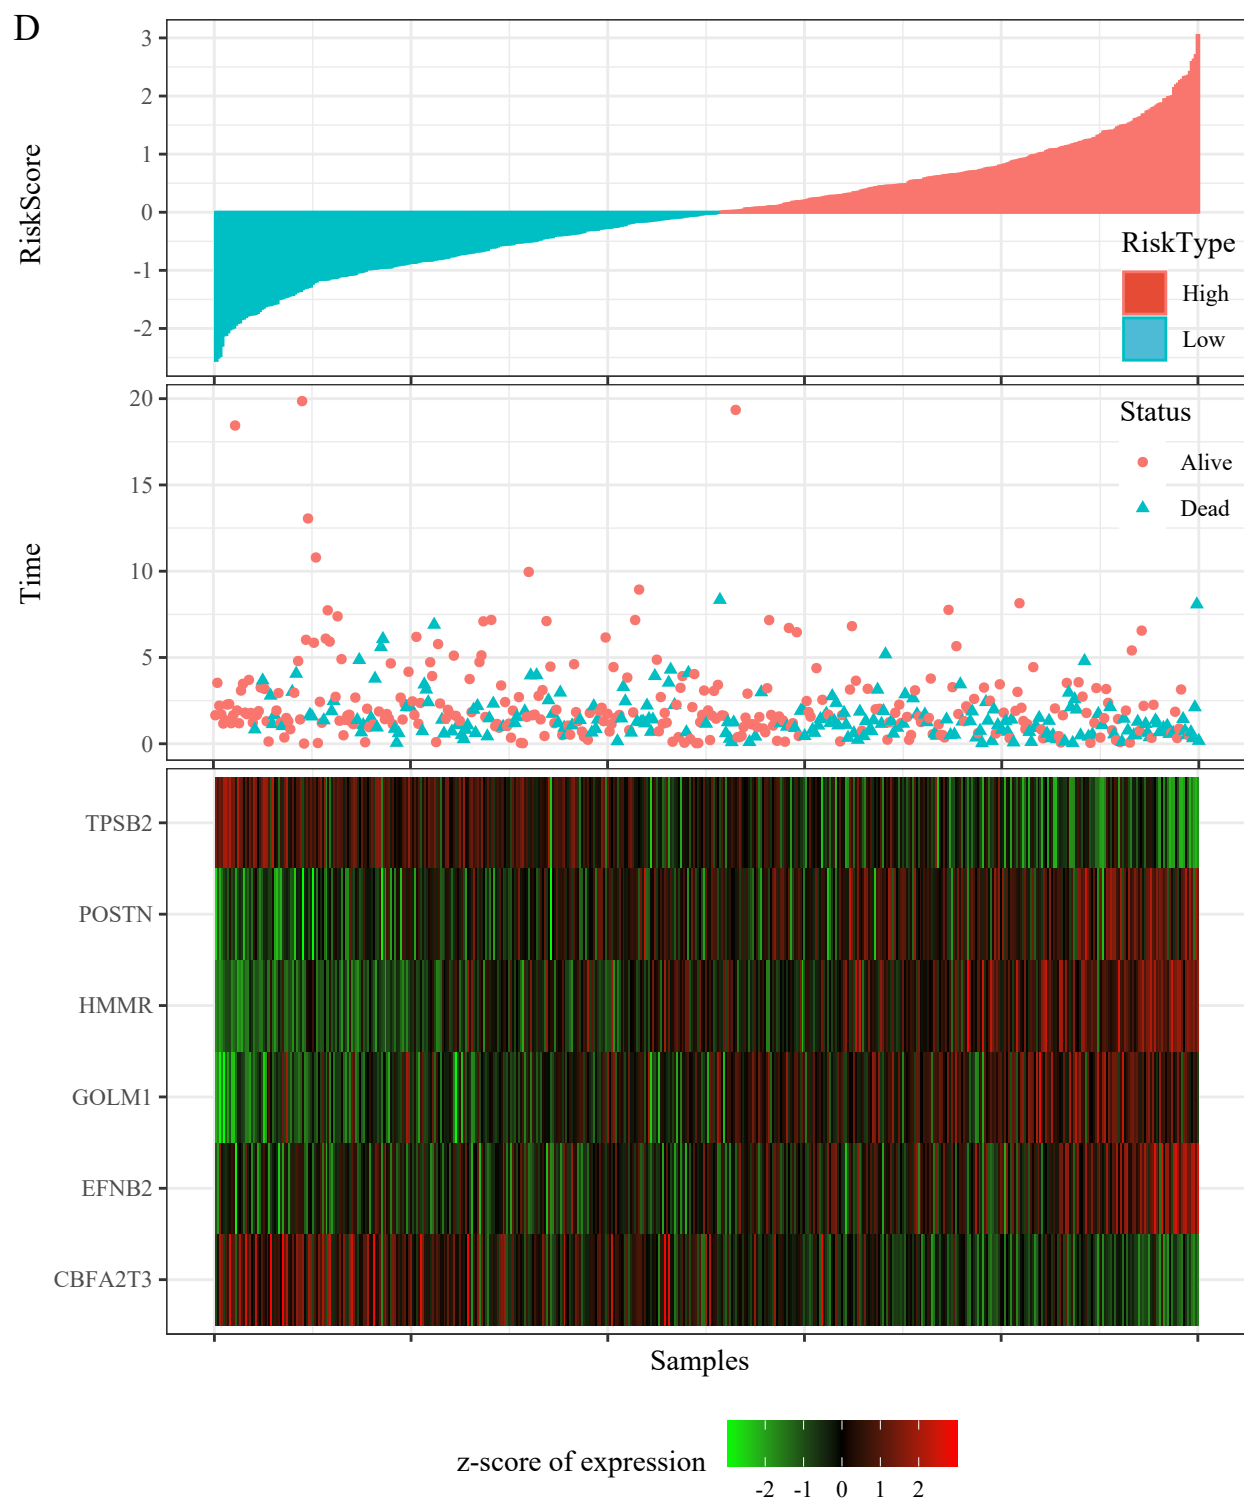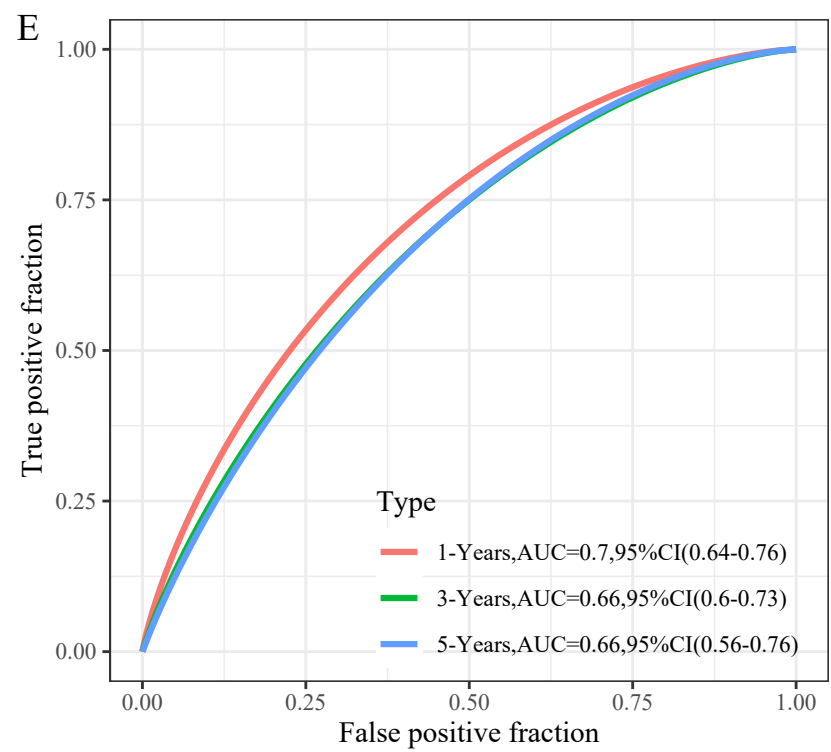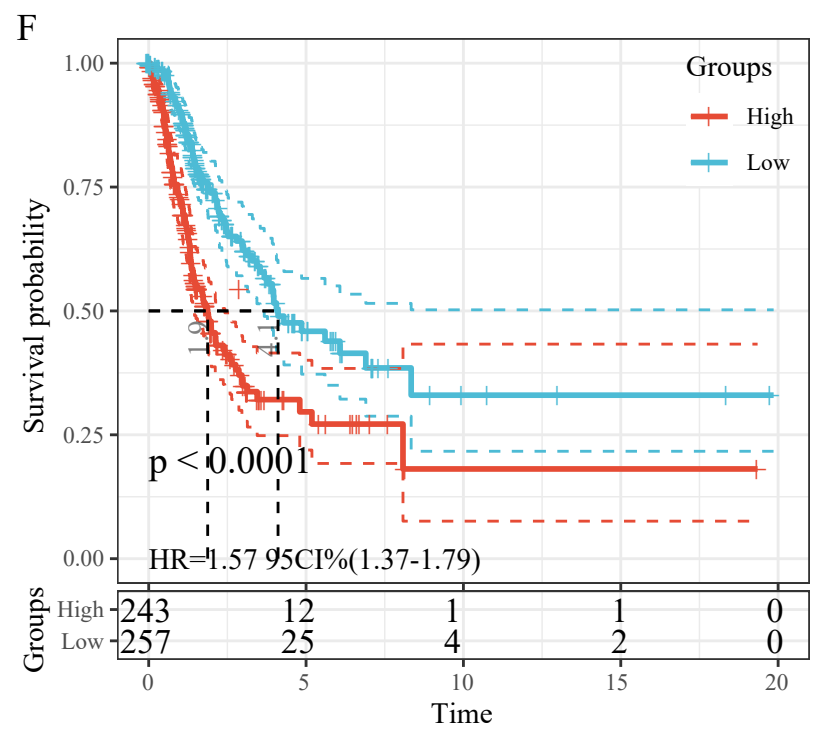

Supplement: f1 [file 6962163.f1.pdf]

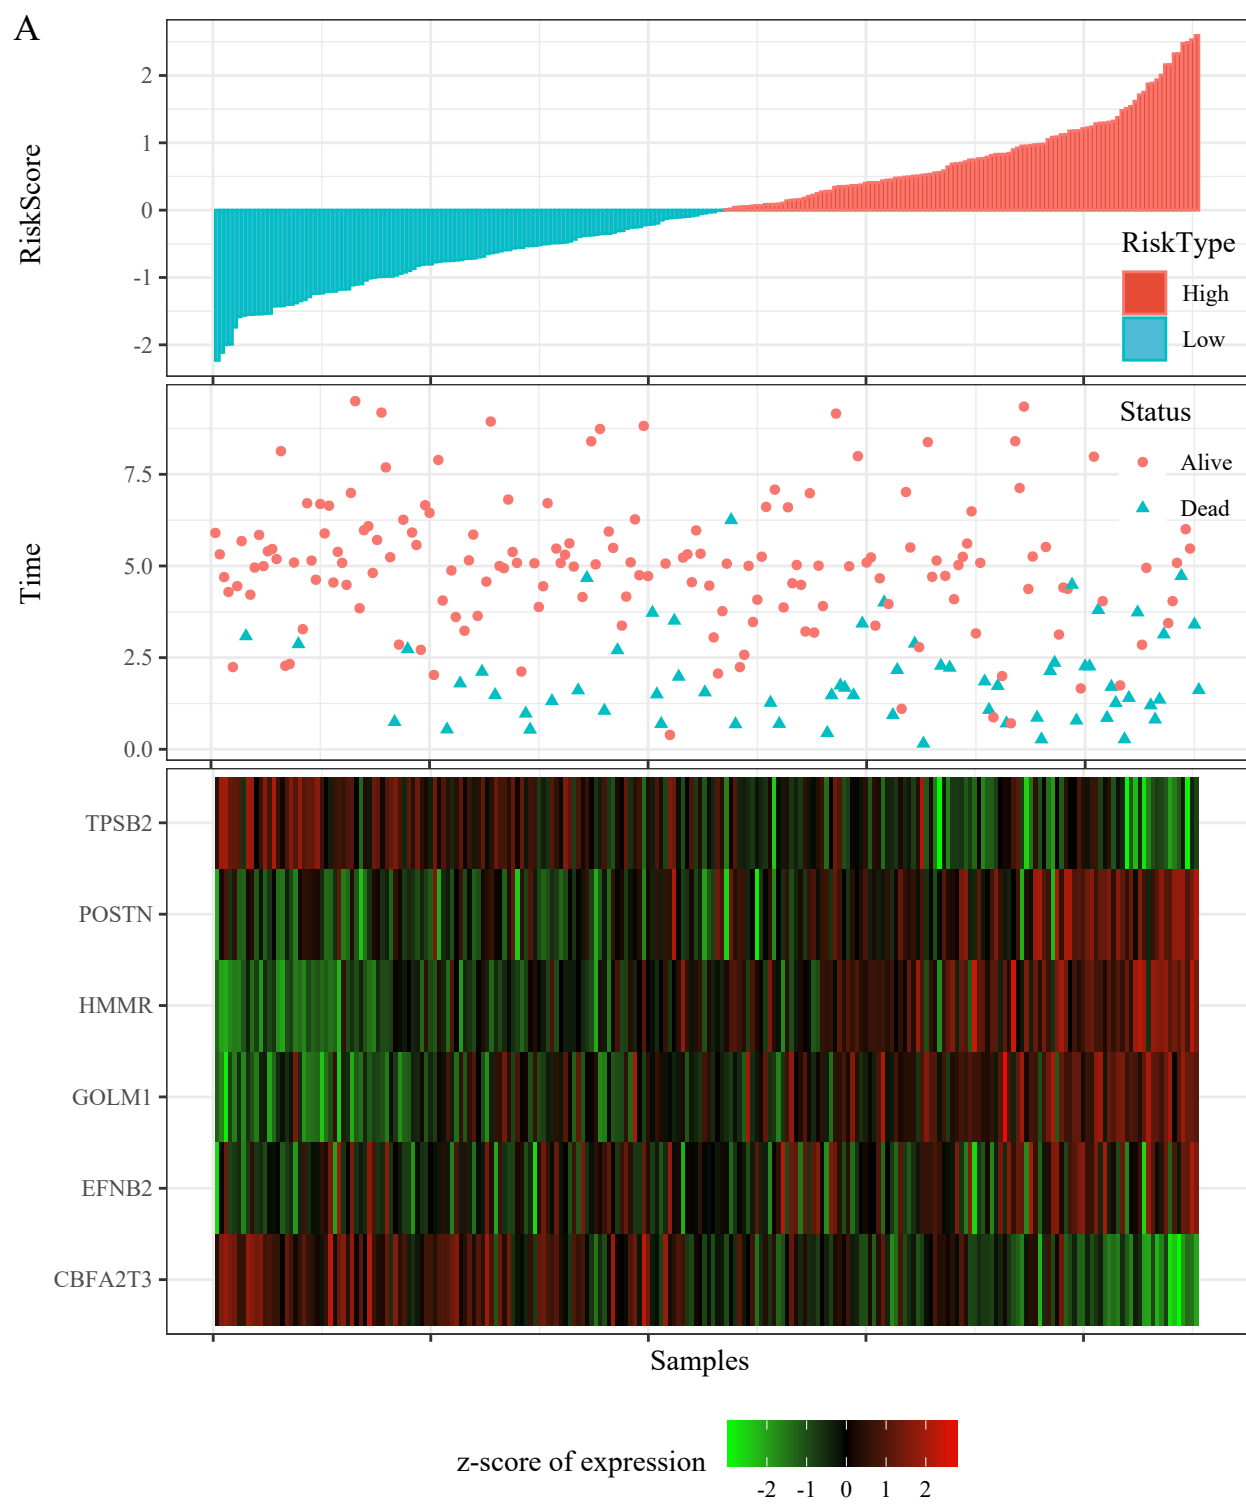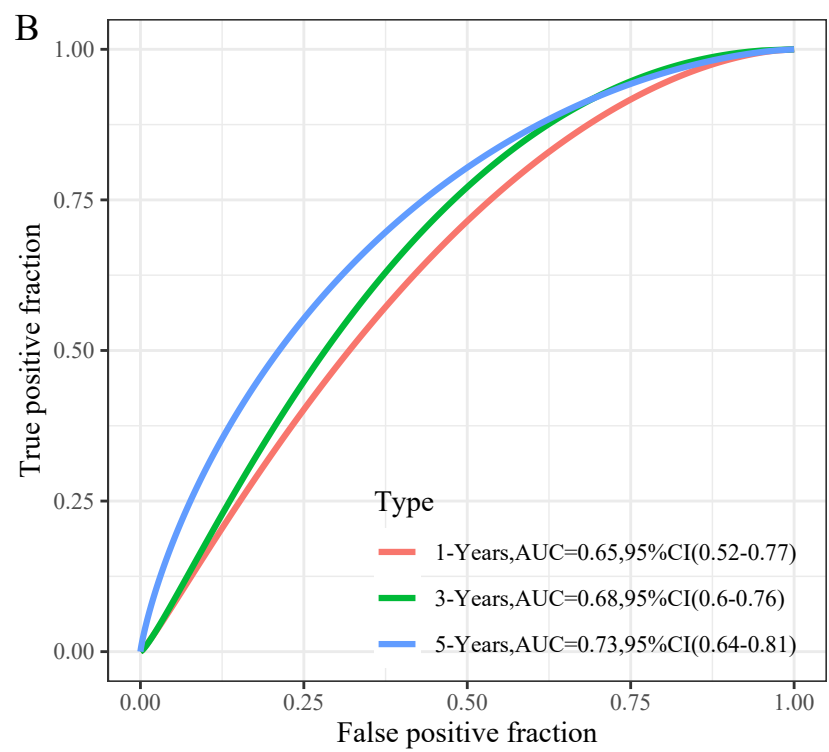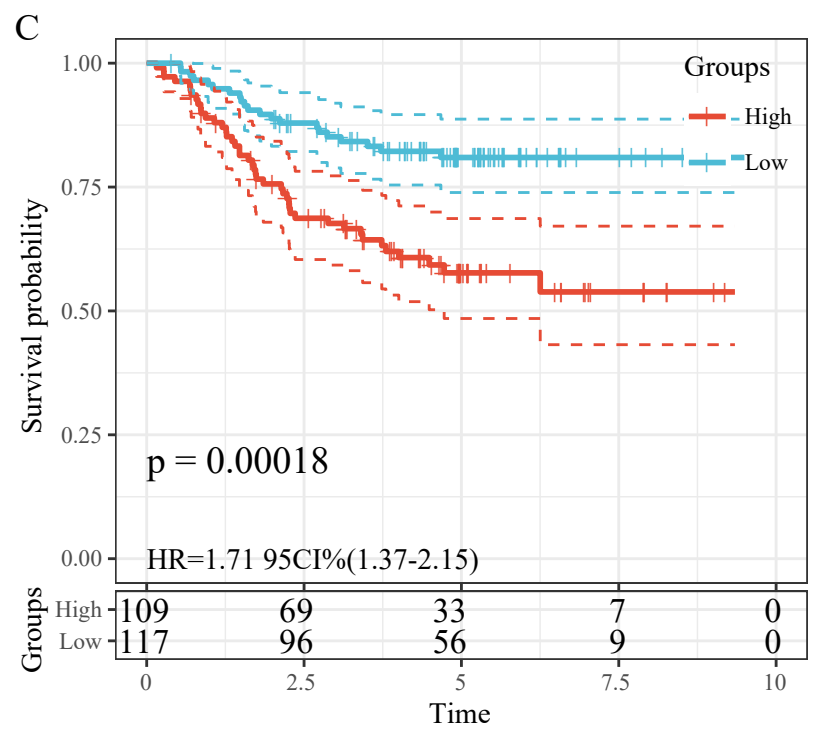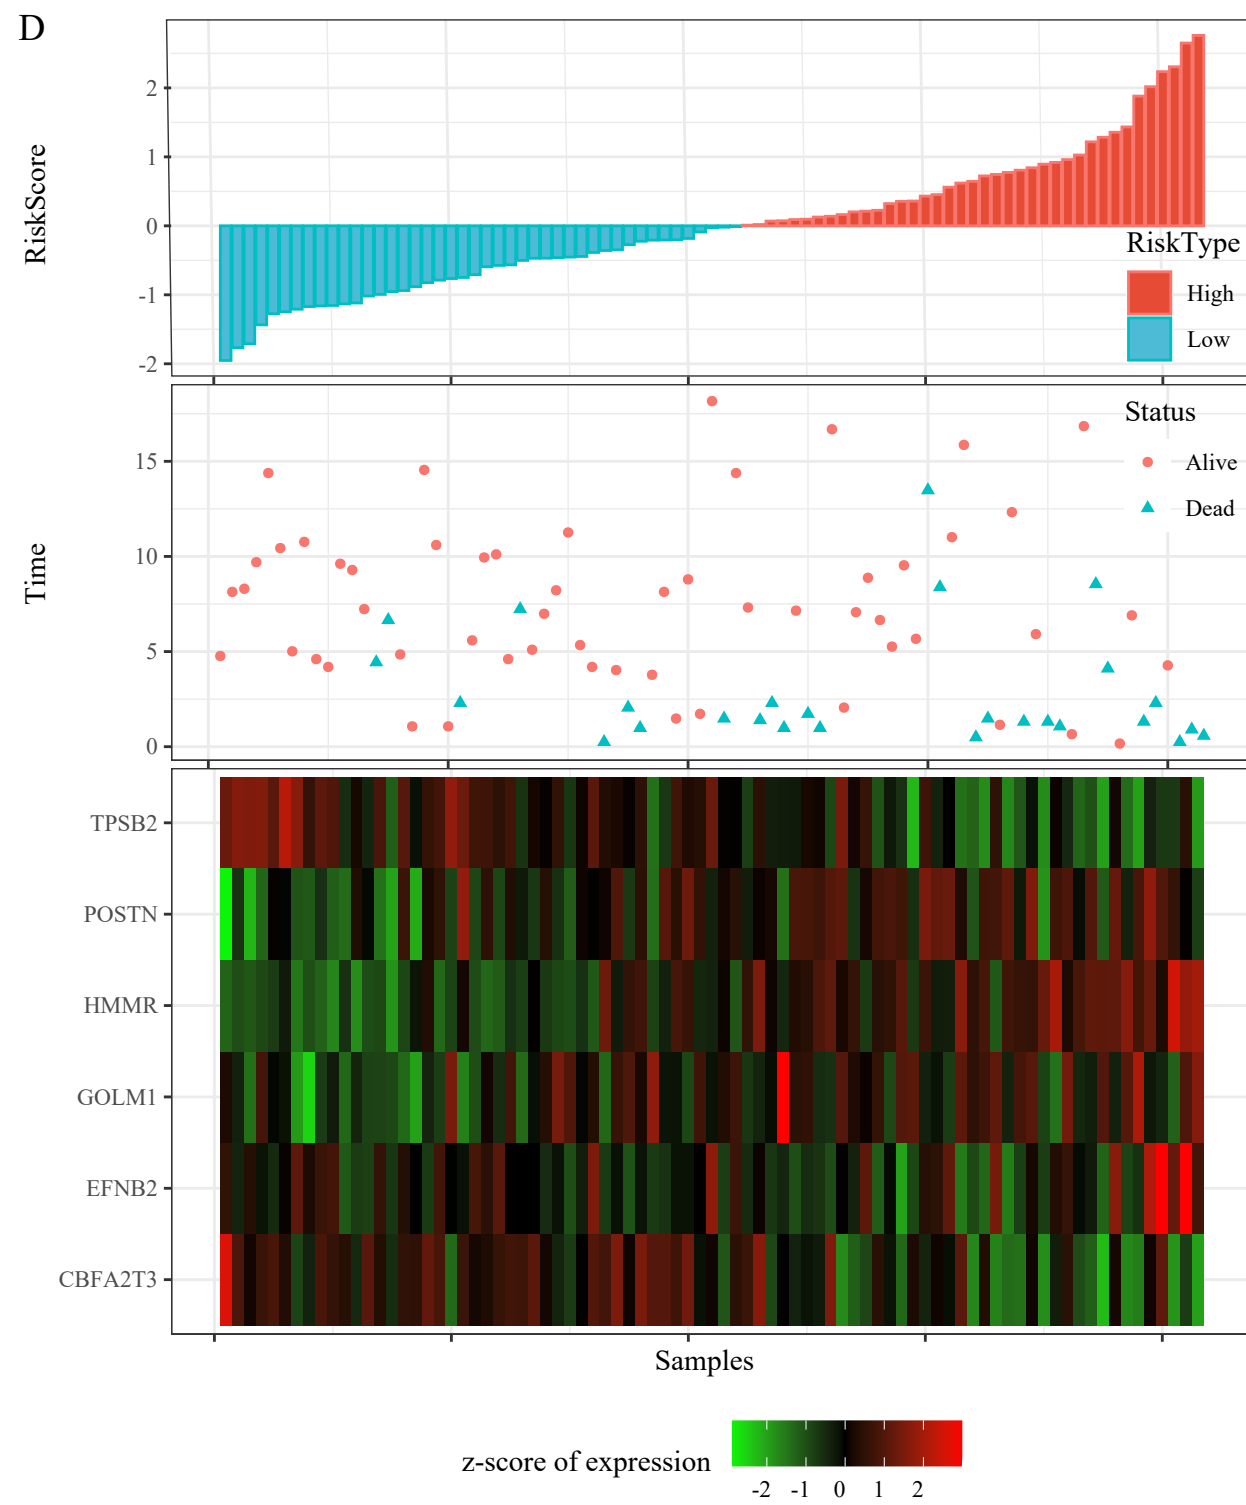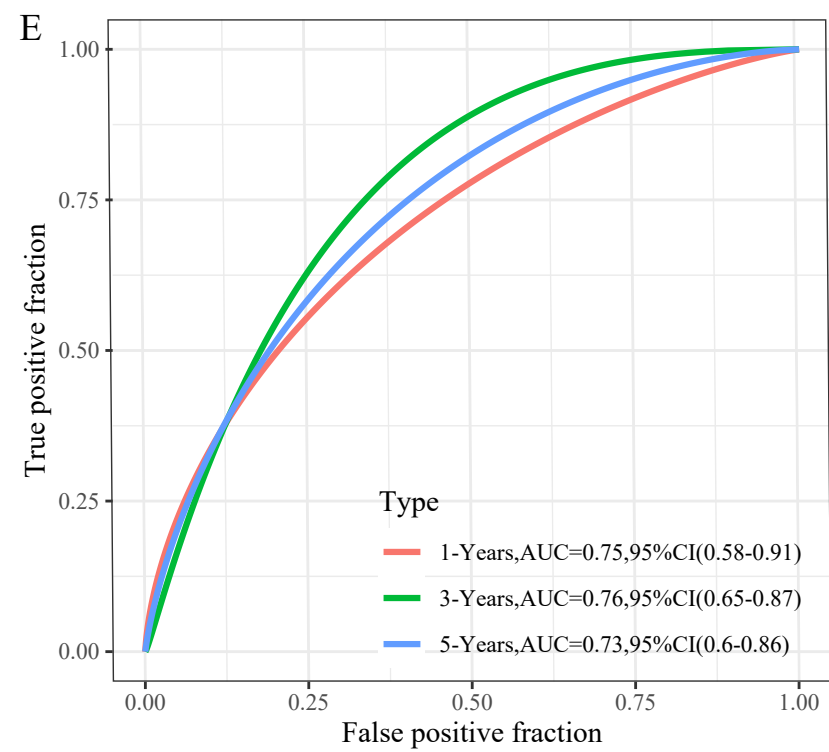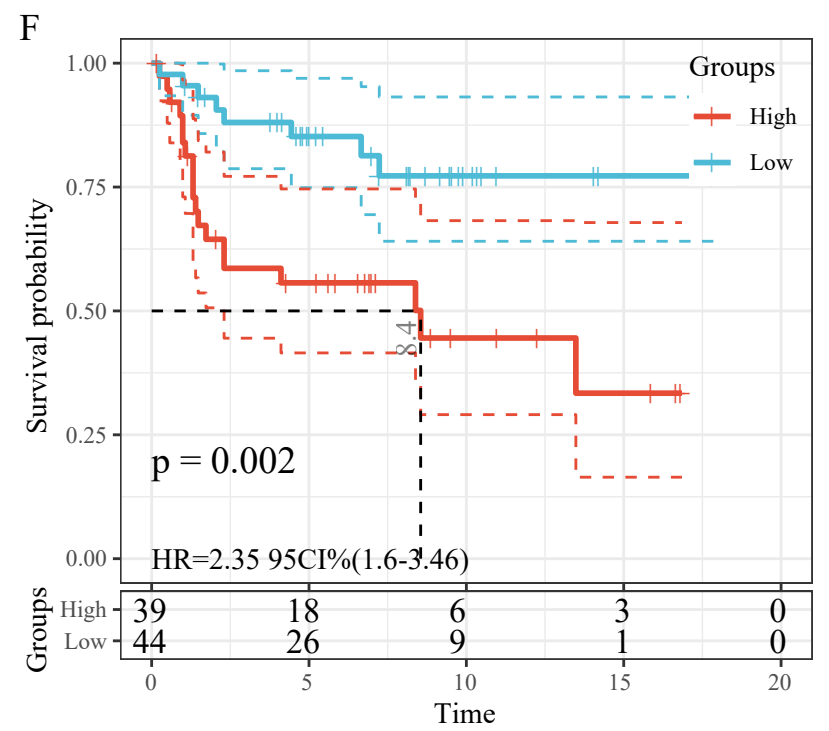

Supplement: f2 [file 6962163.f2.pdf]

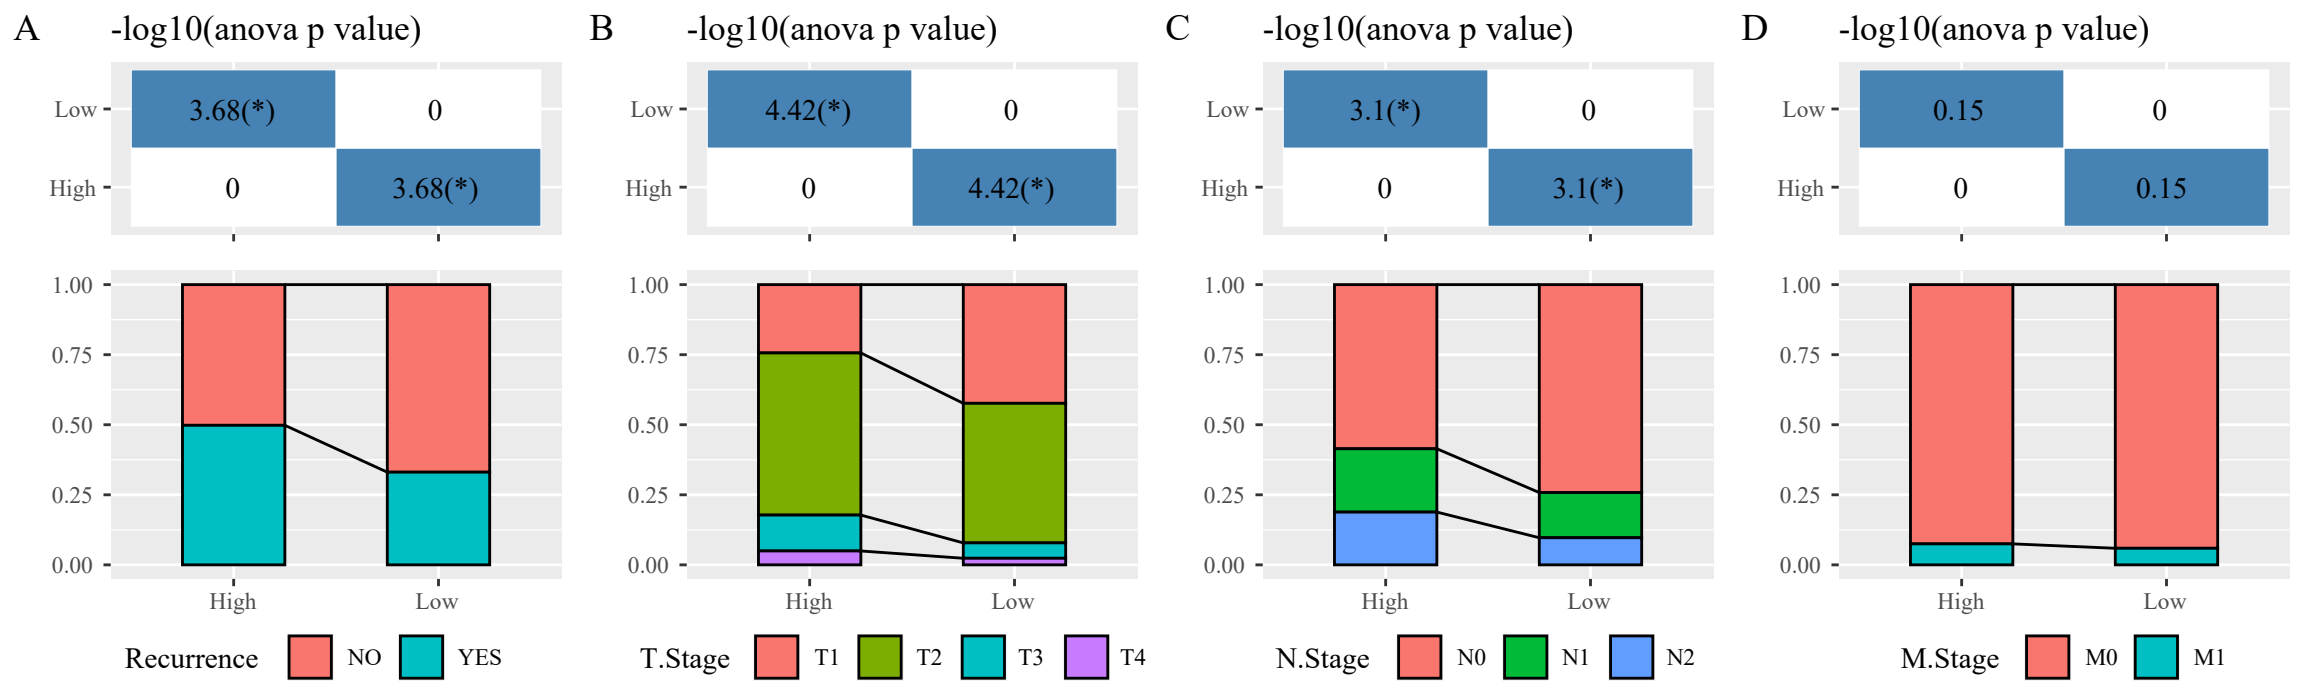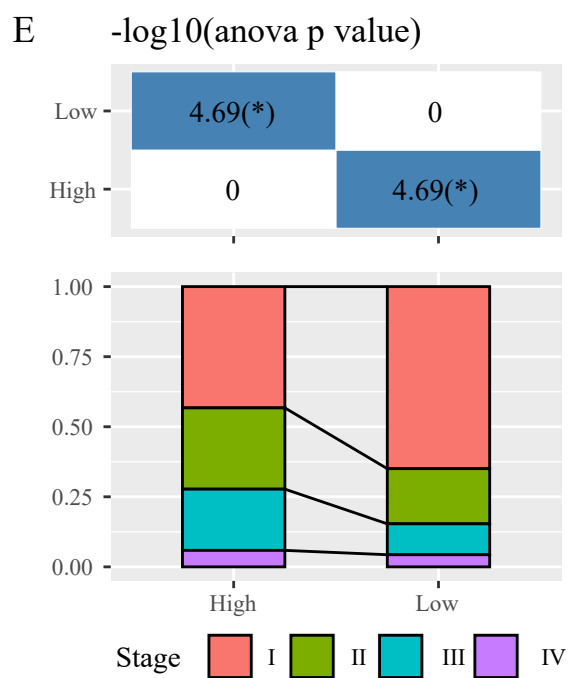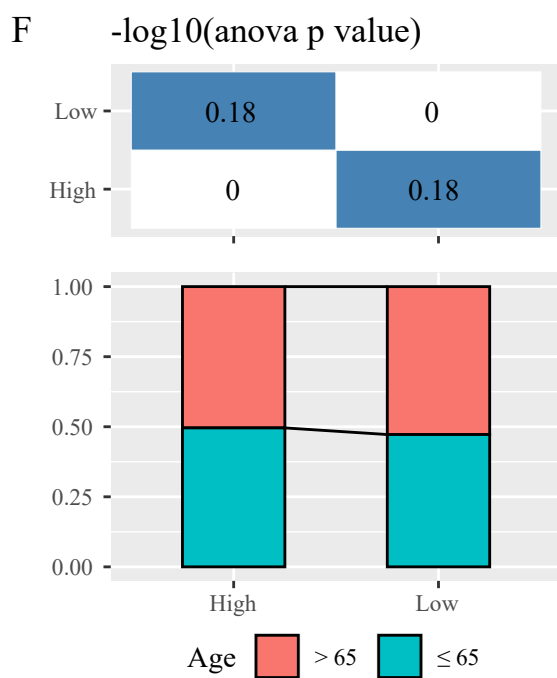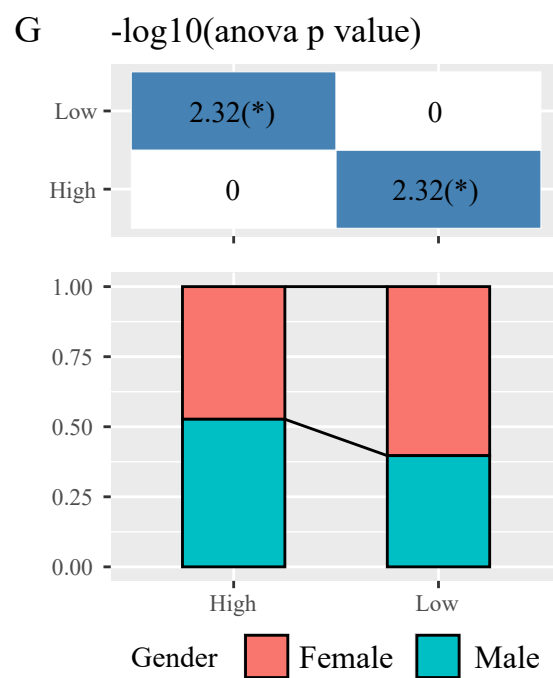

Supplement: f3 [file 6962163.f3.pdf]

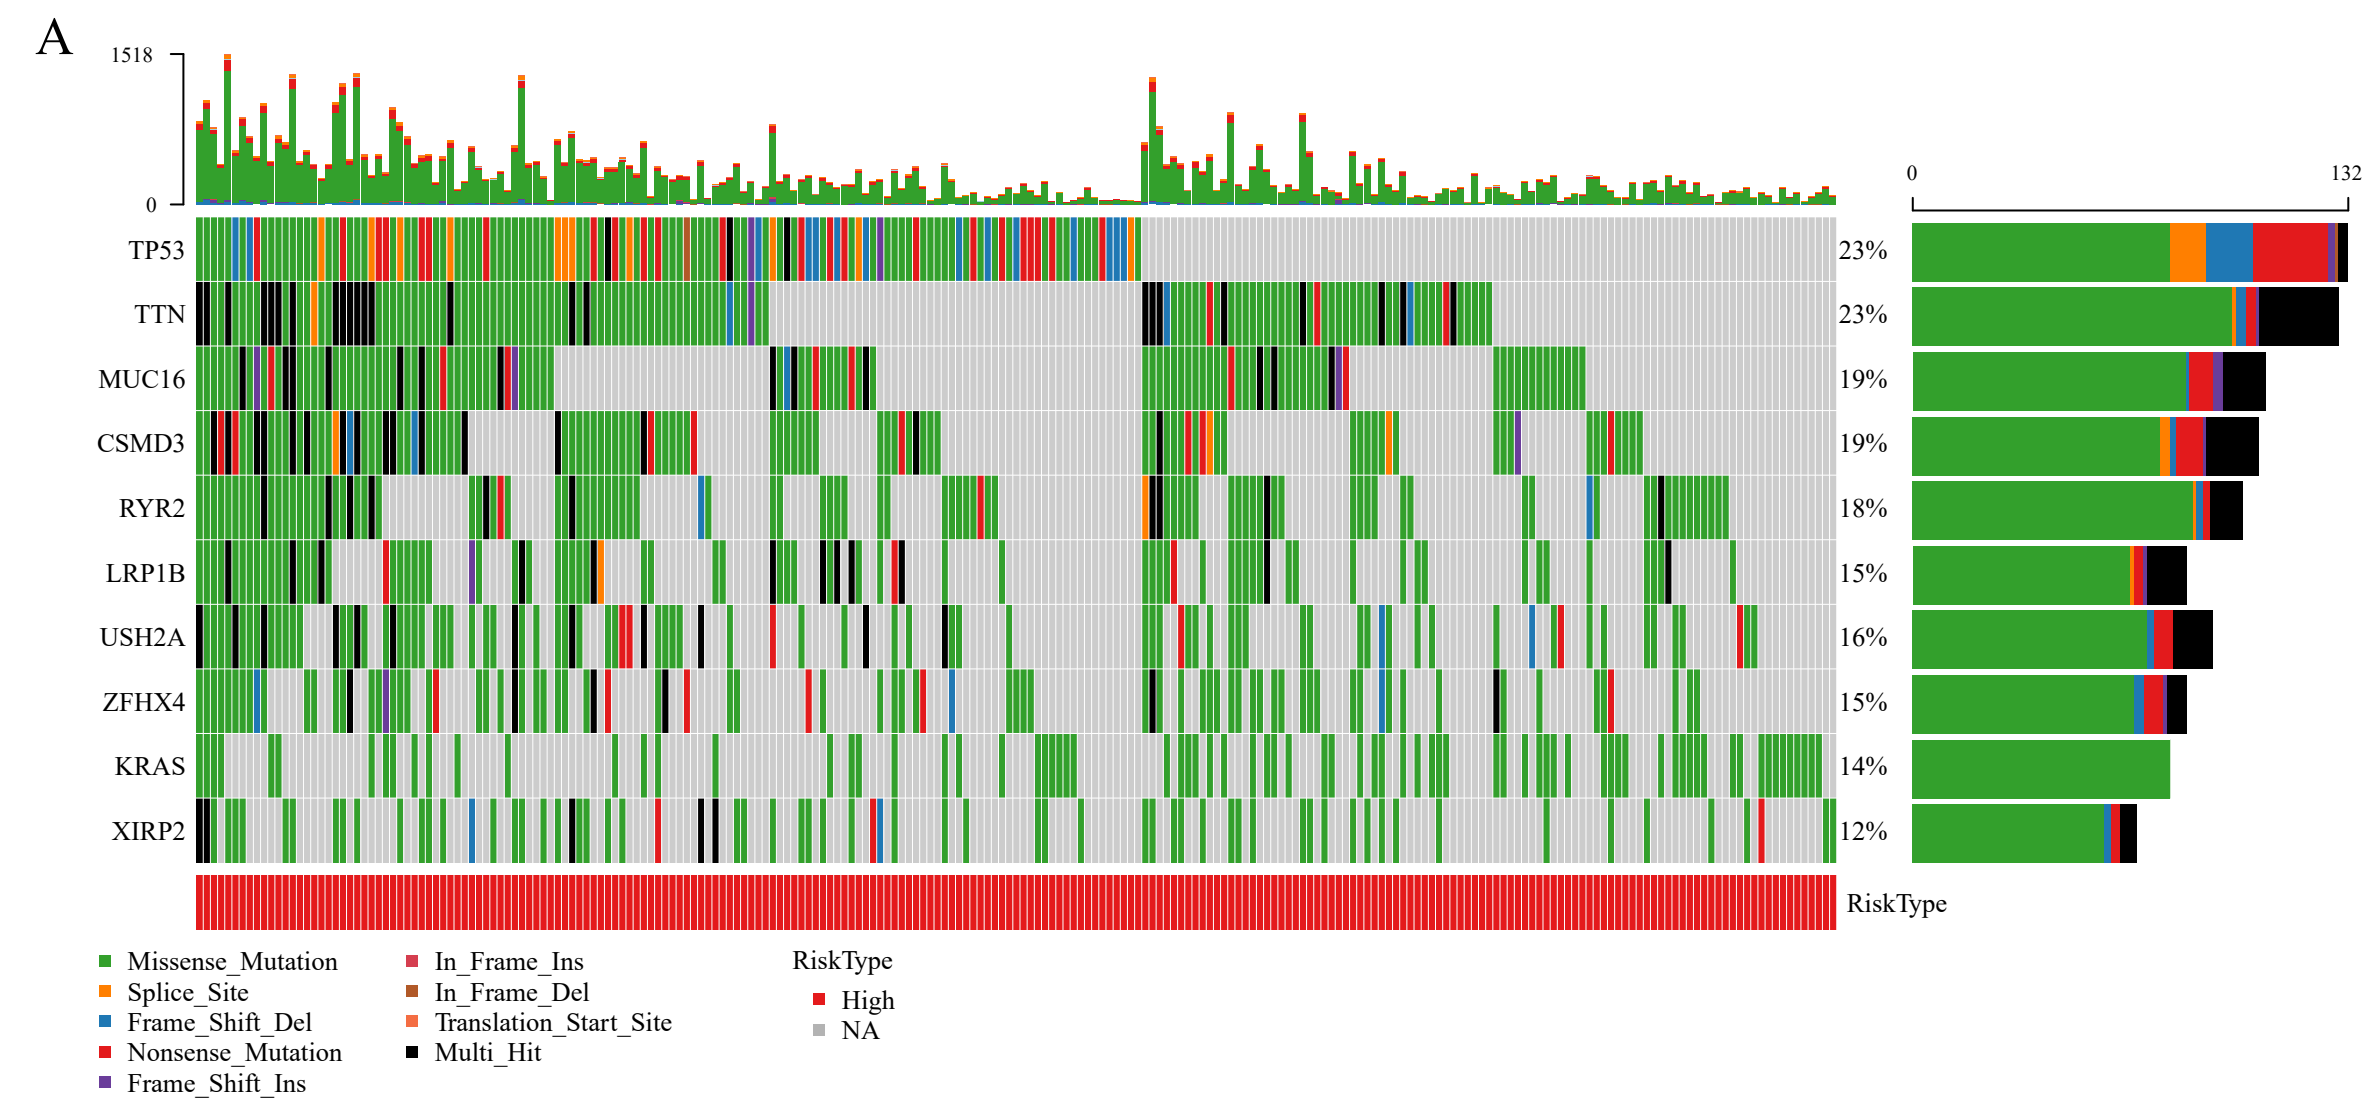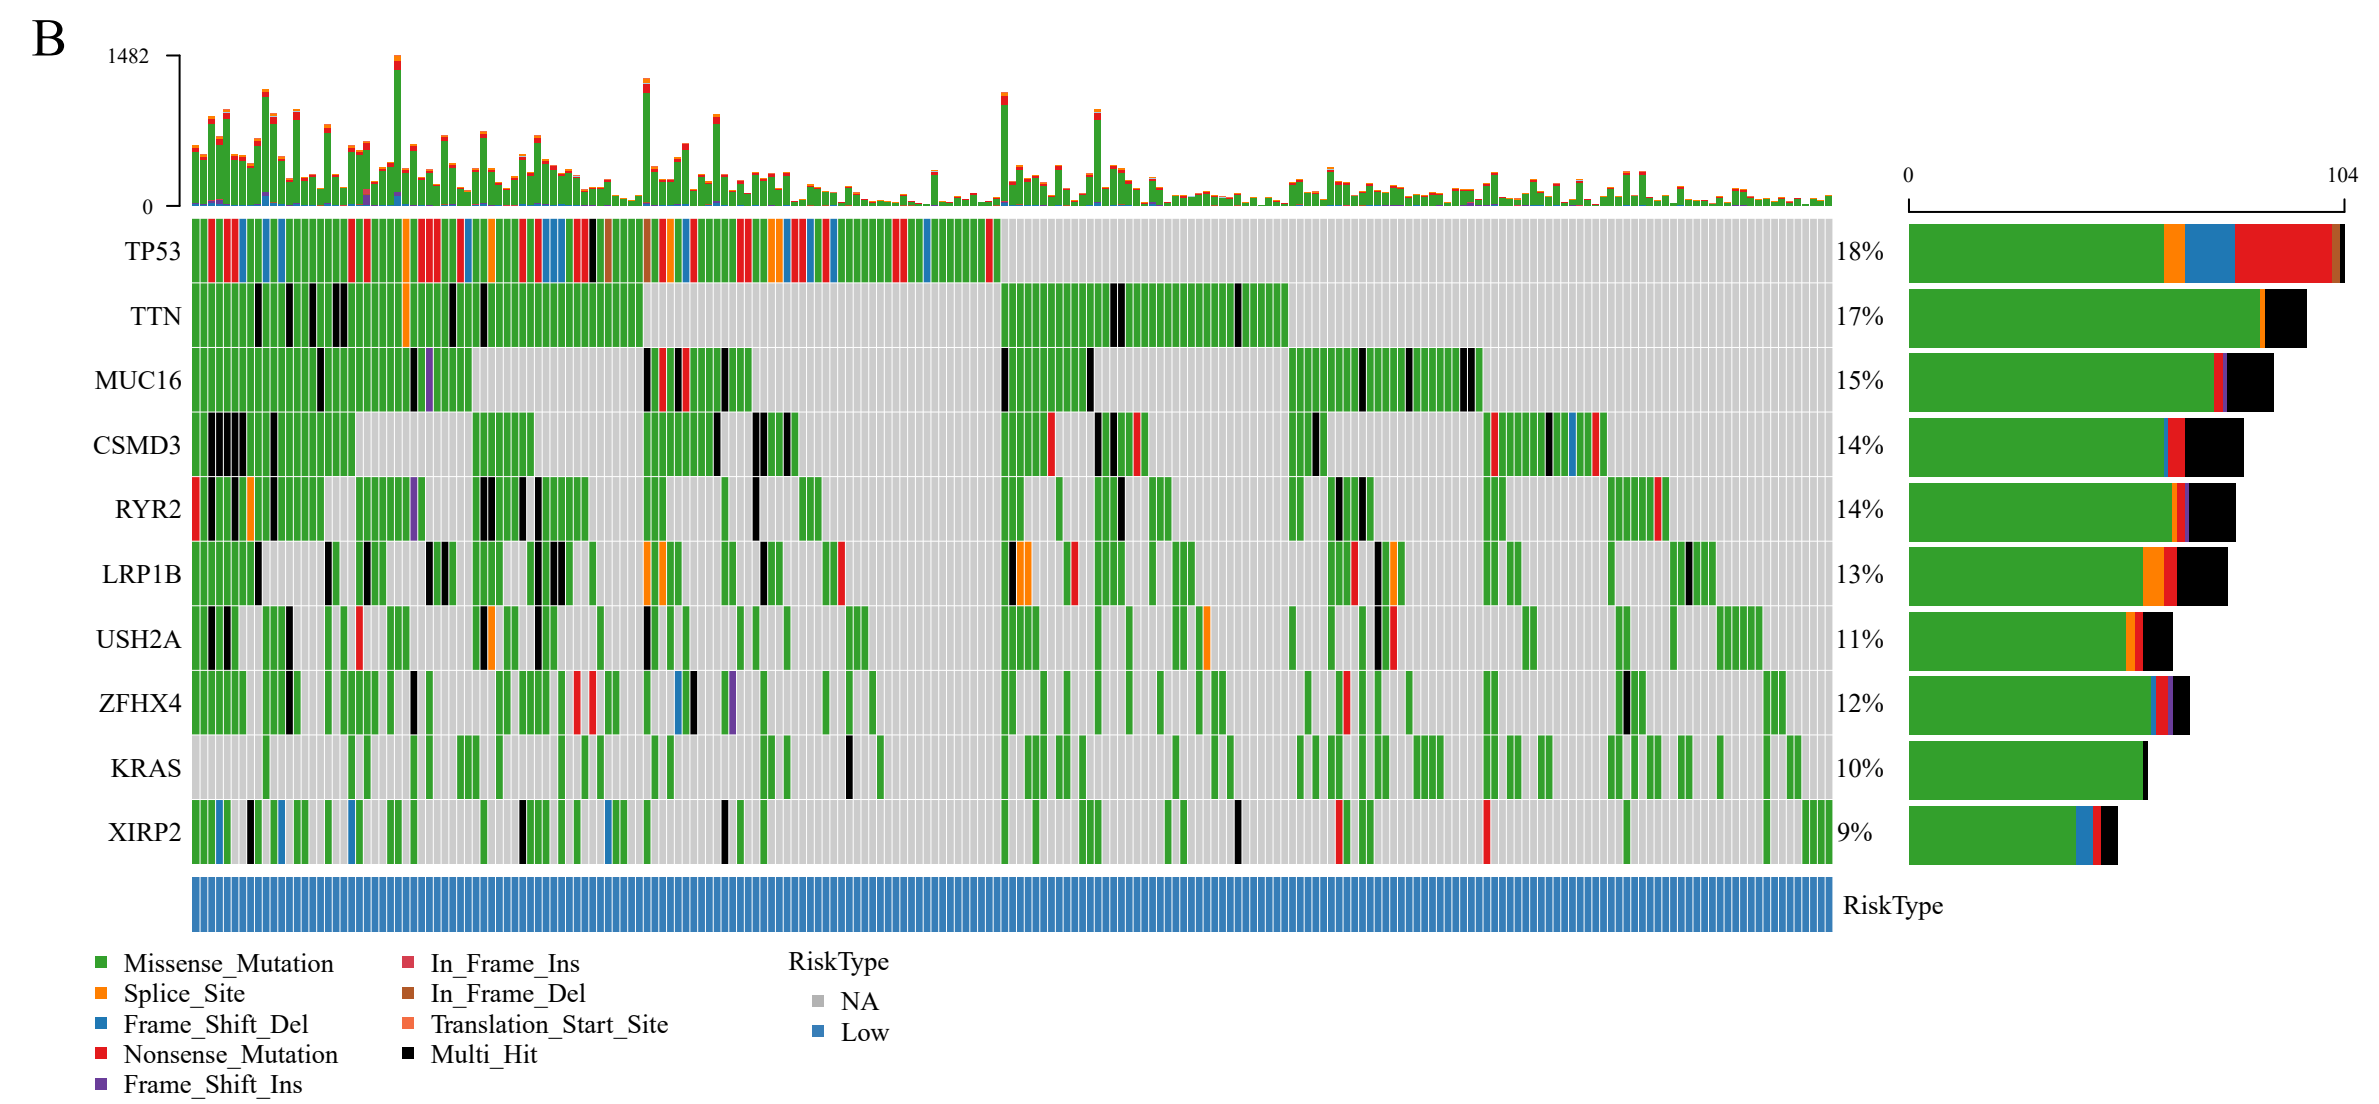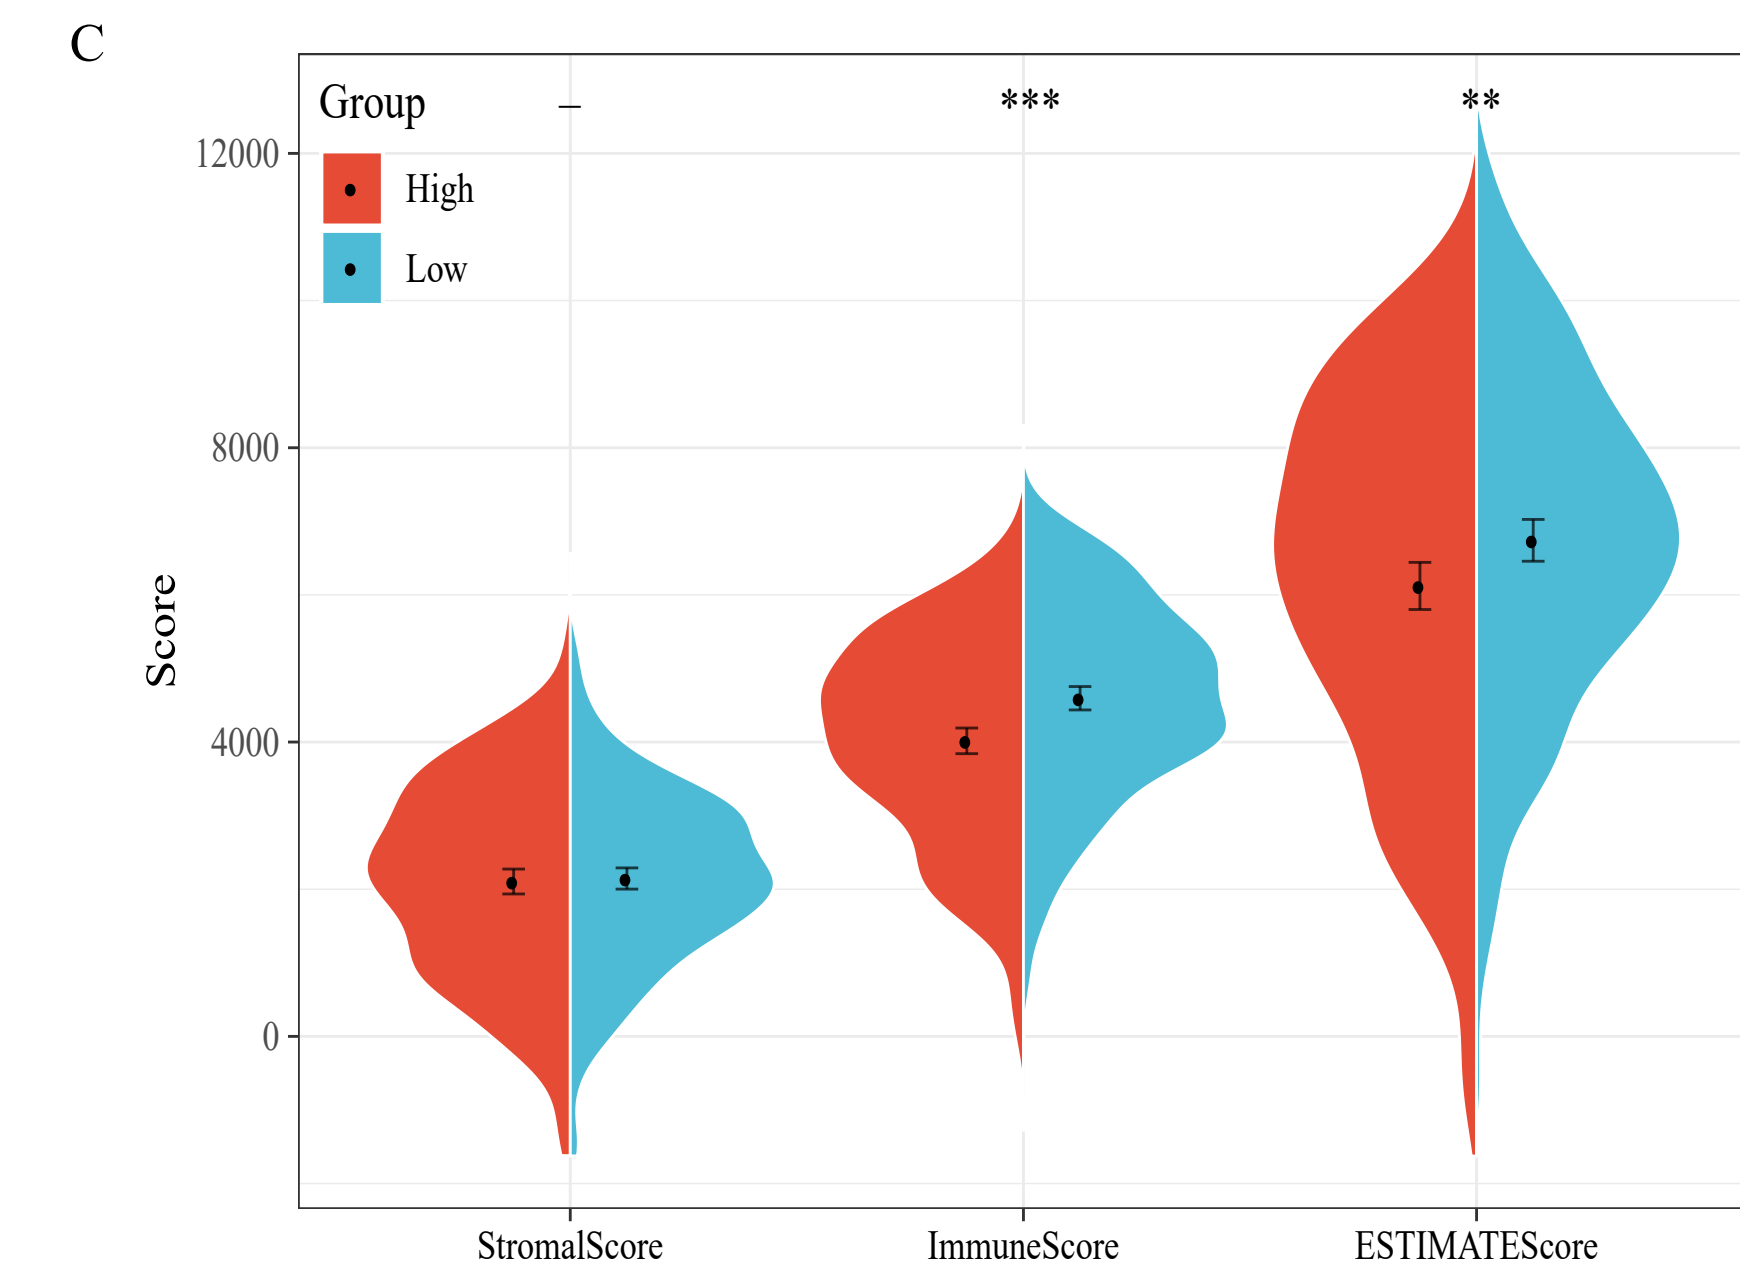

Supplement: f4 [file 6962163.f4.pdf]

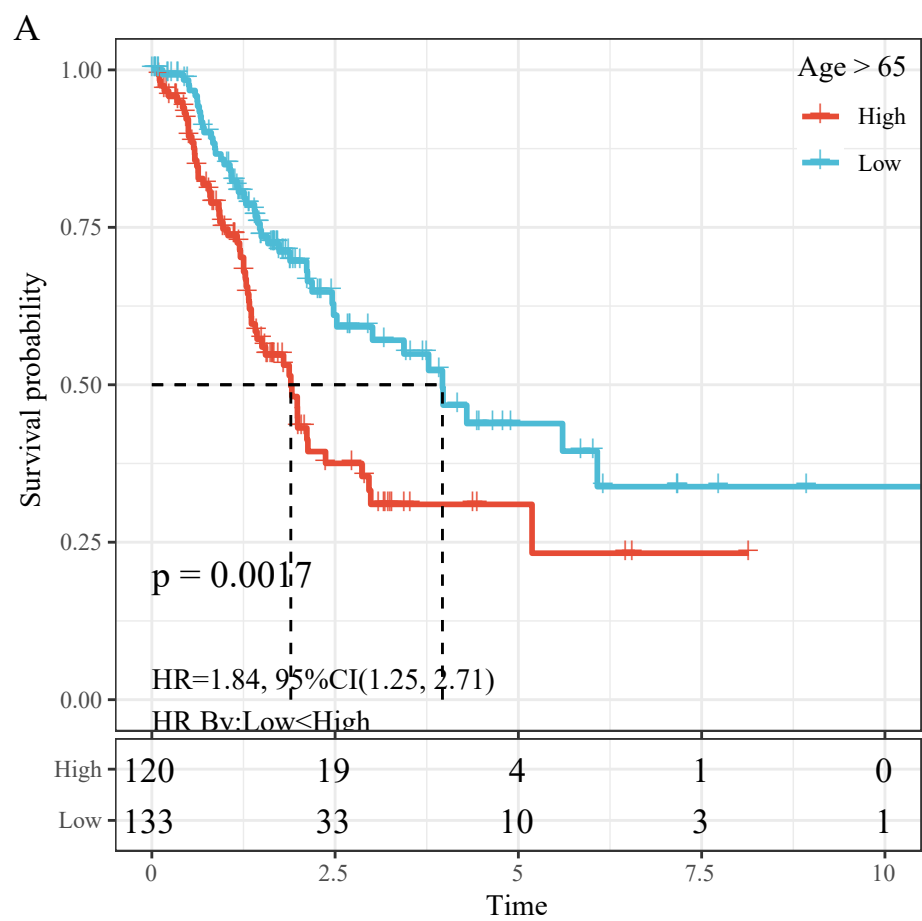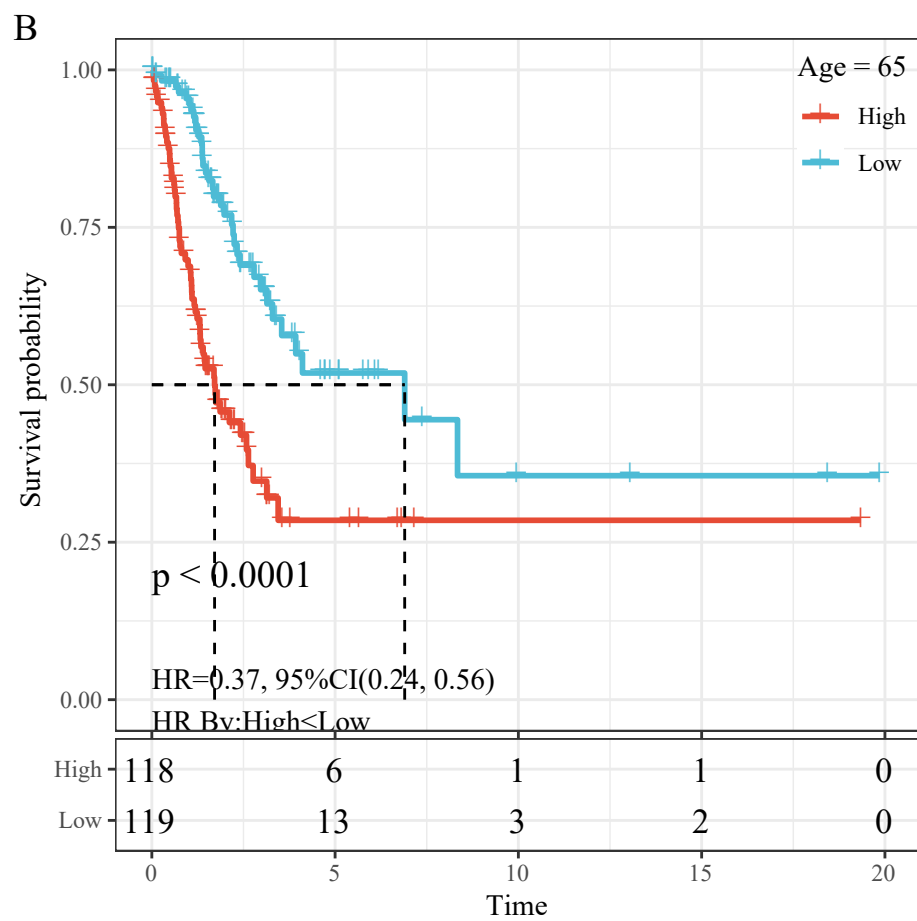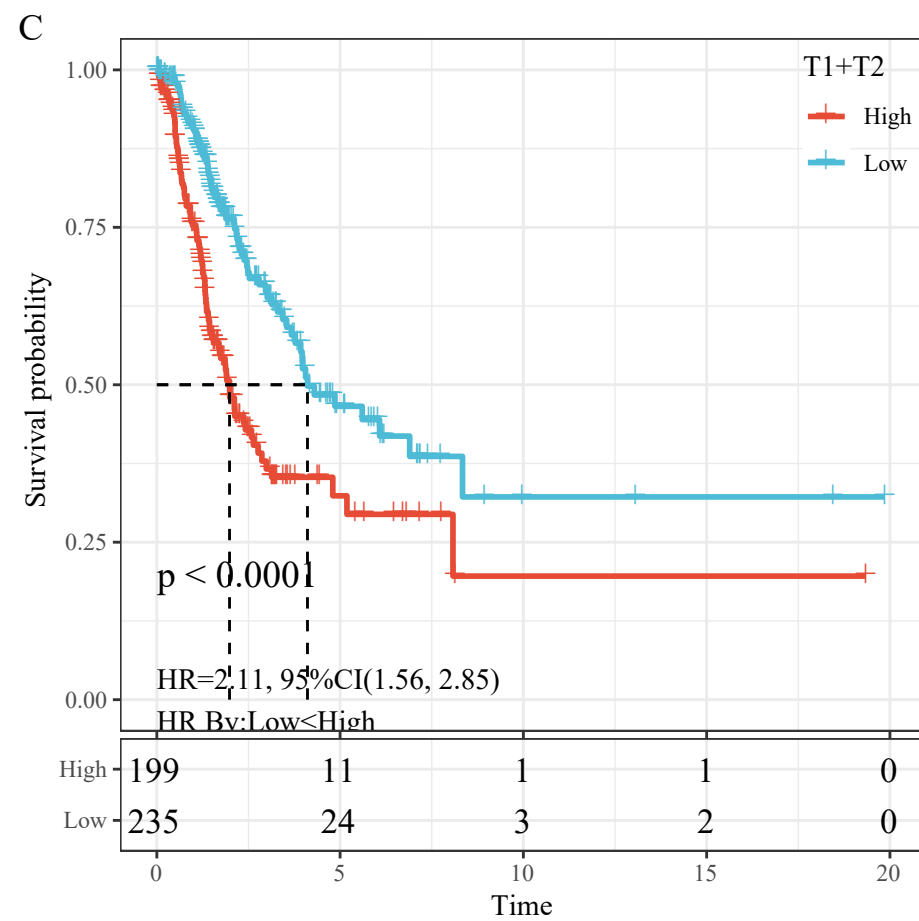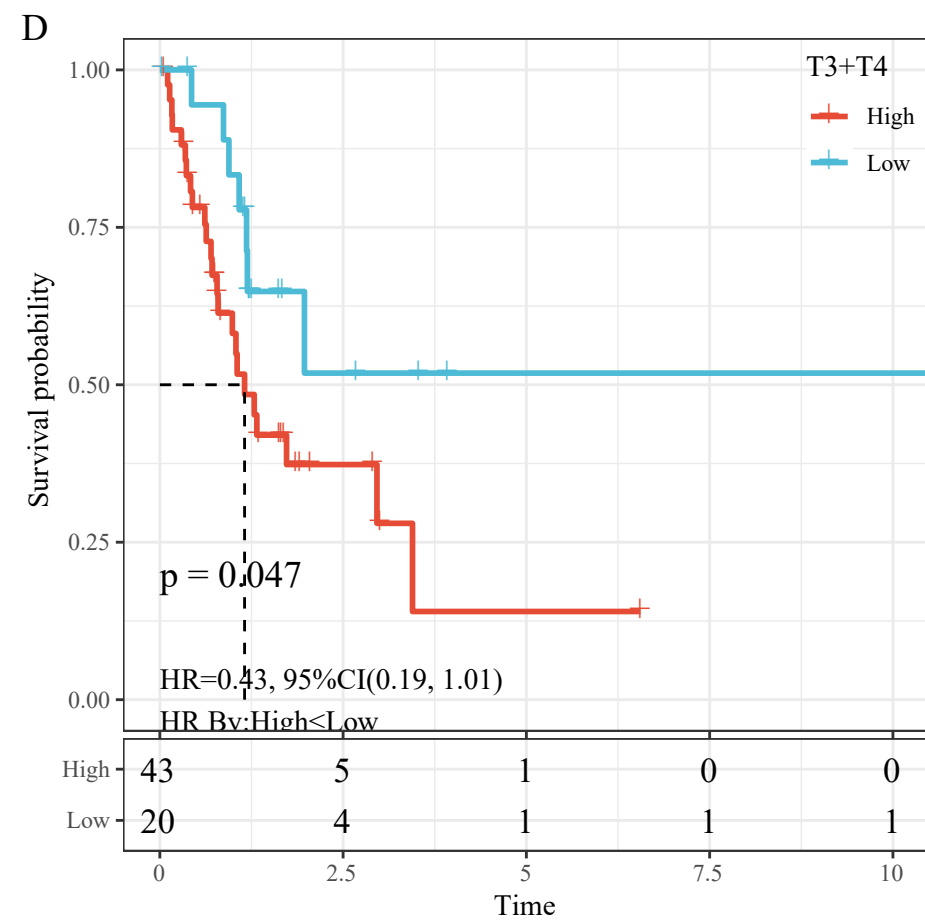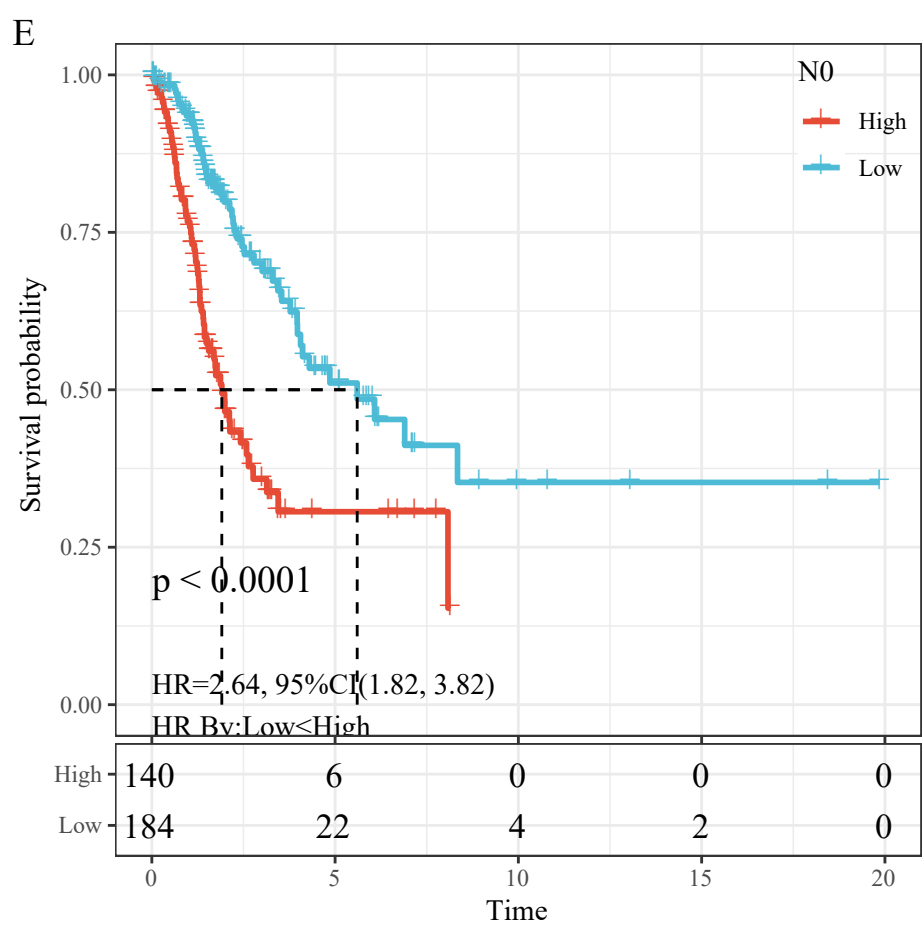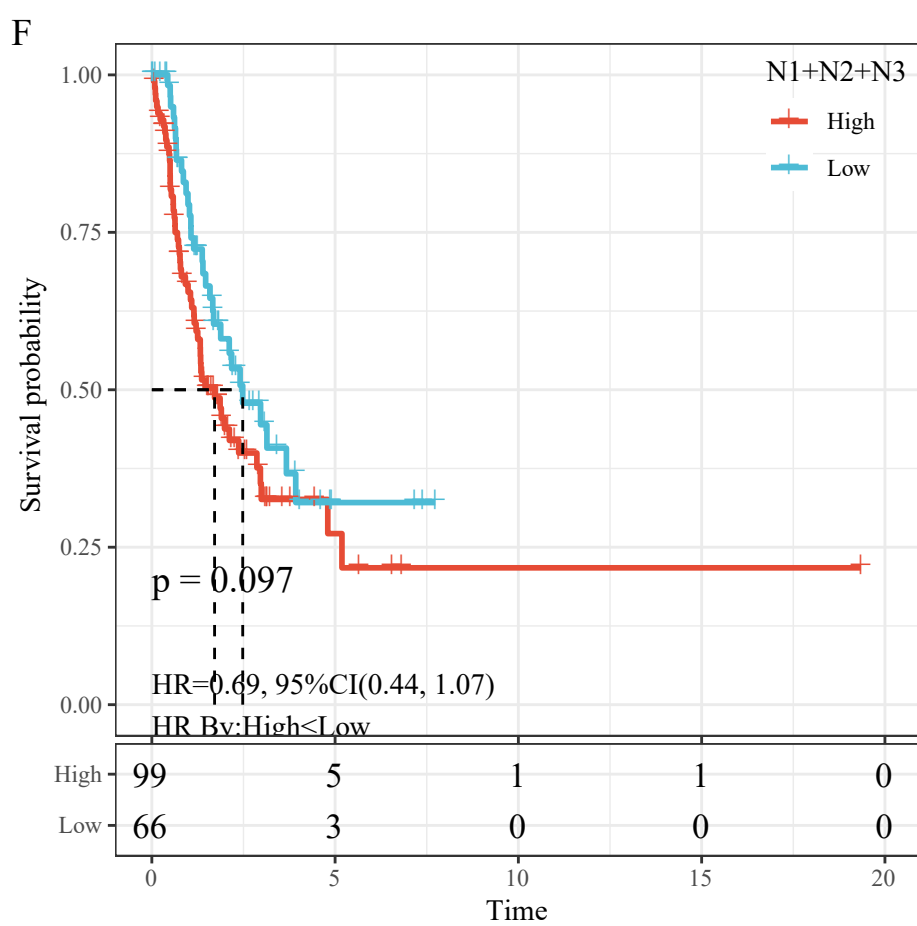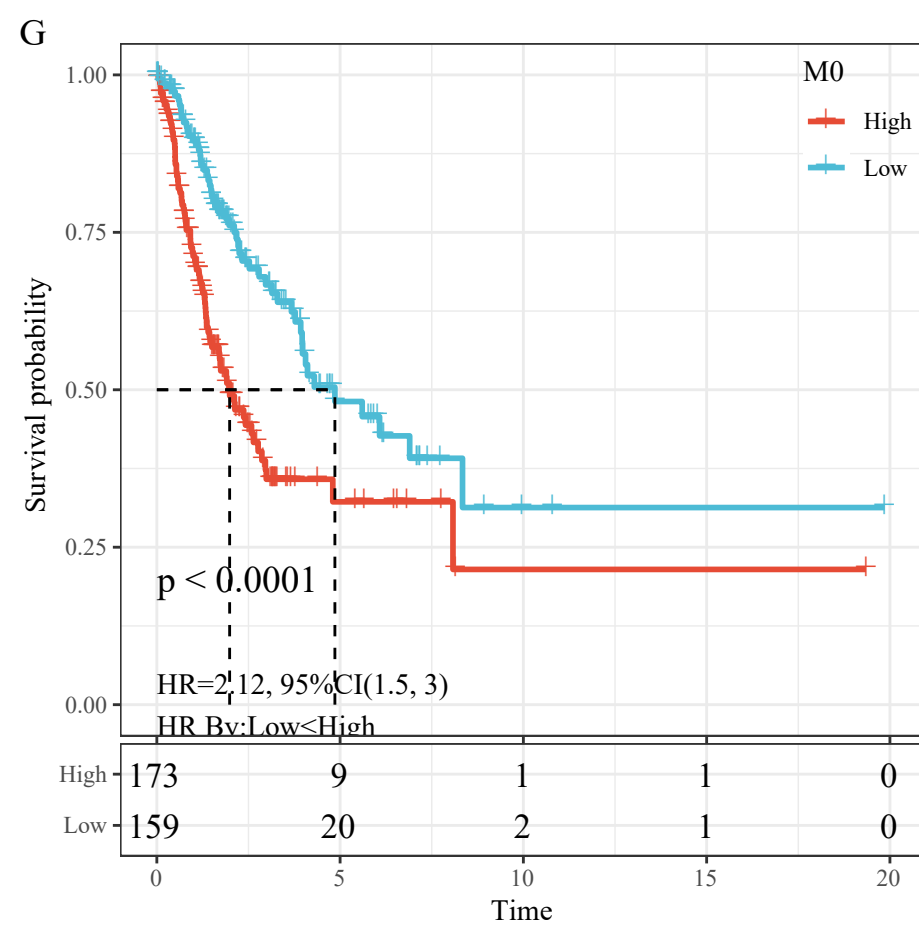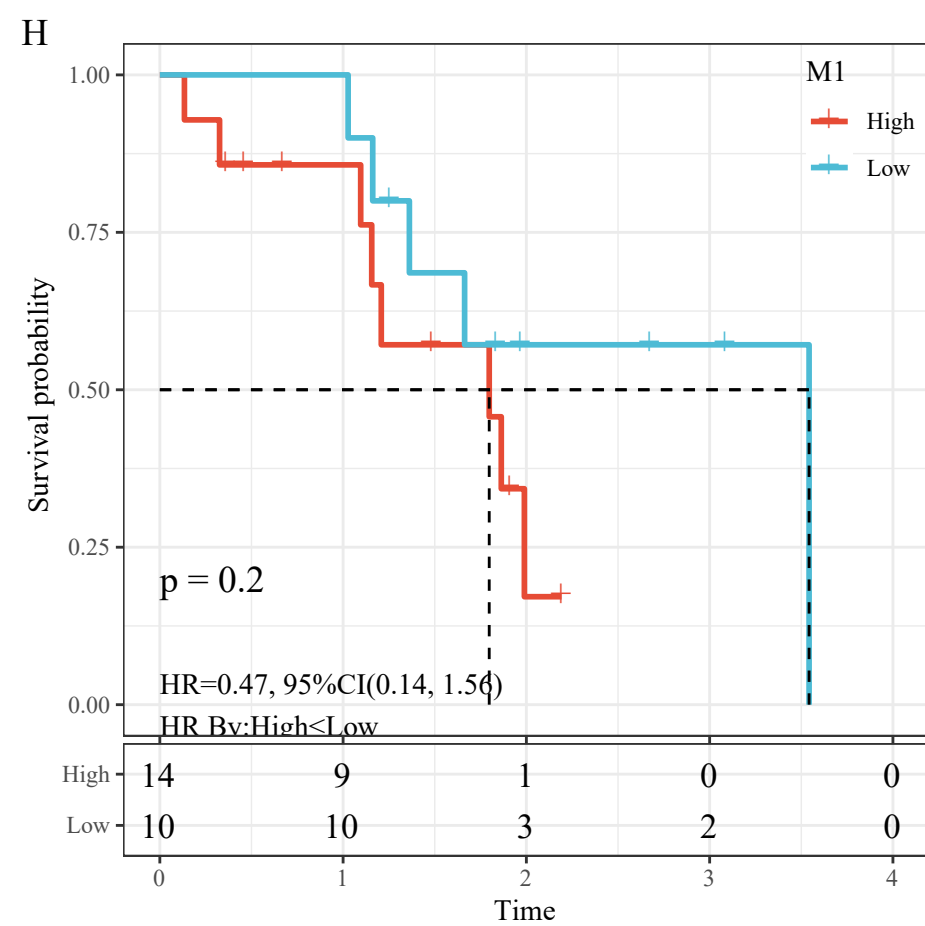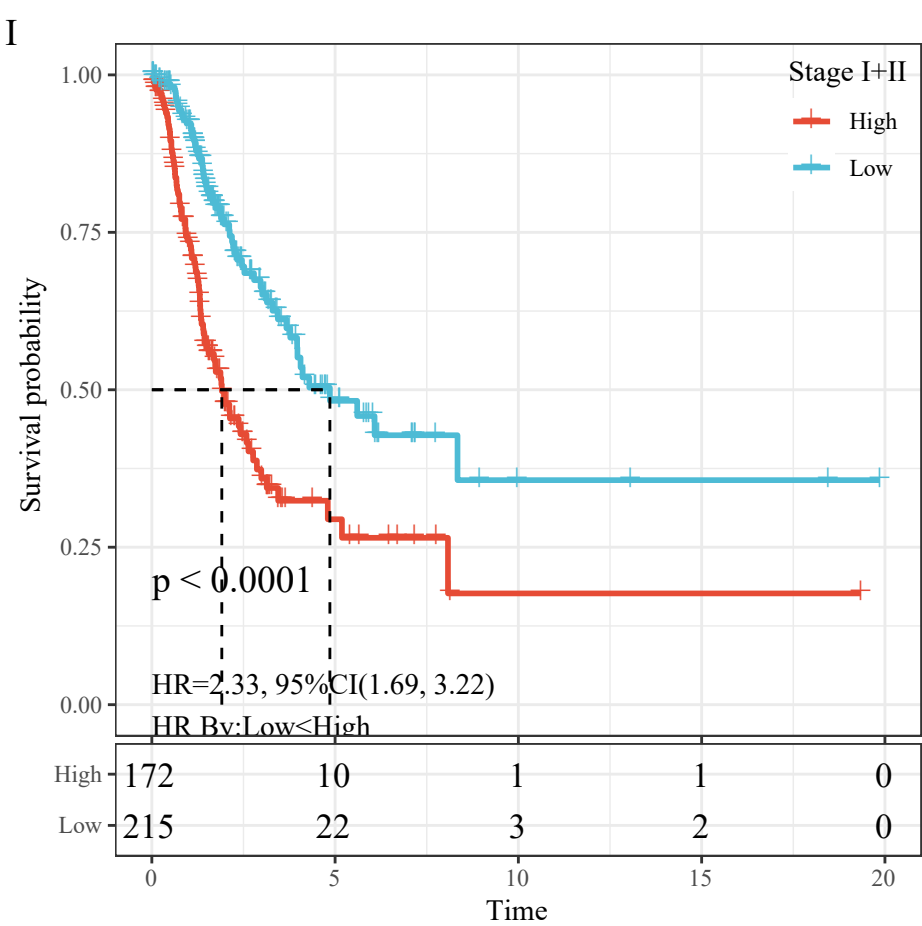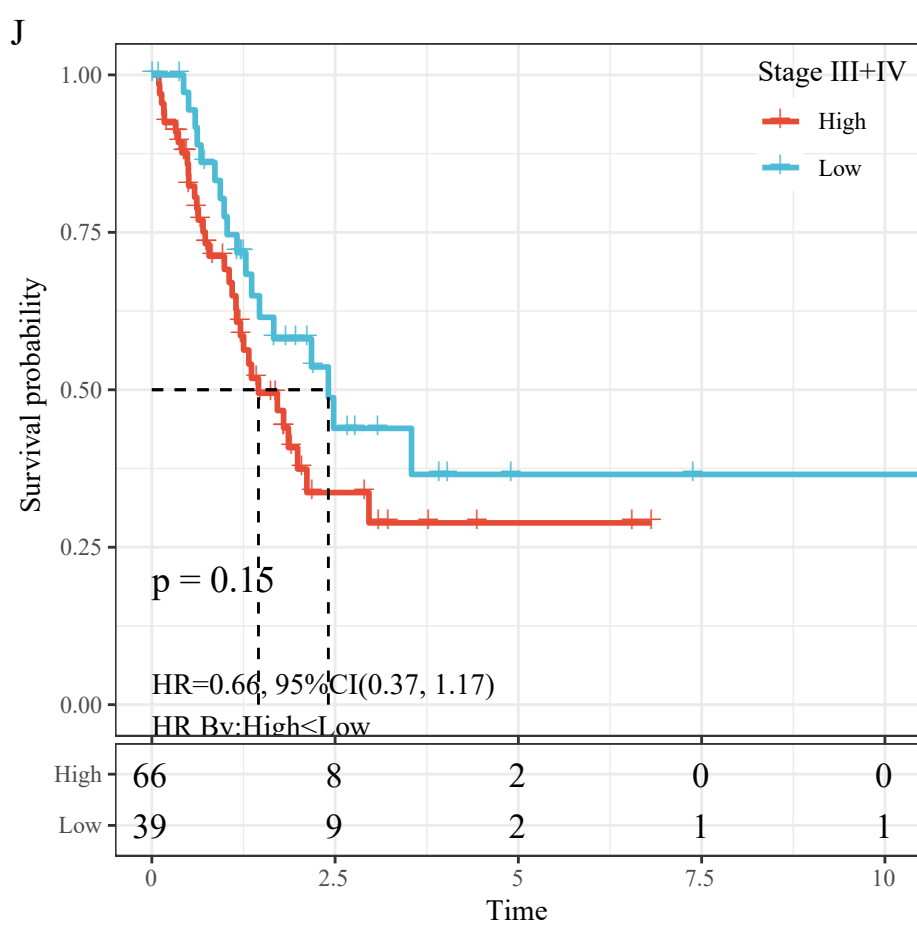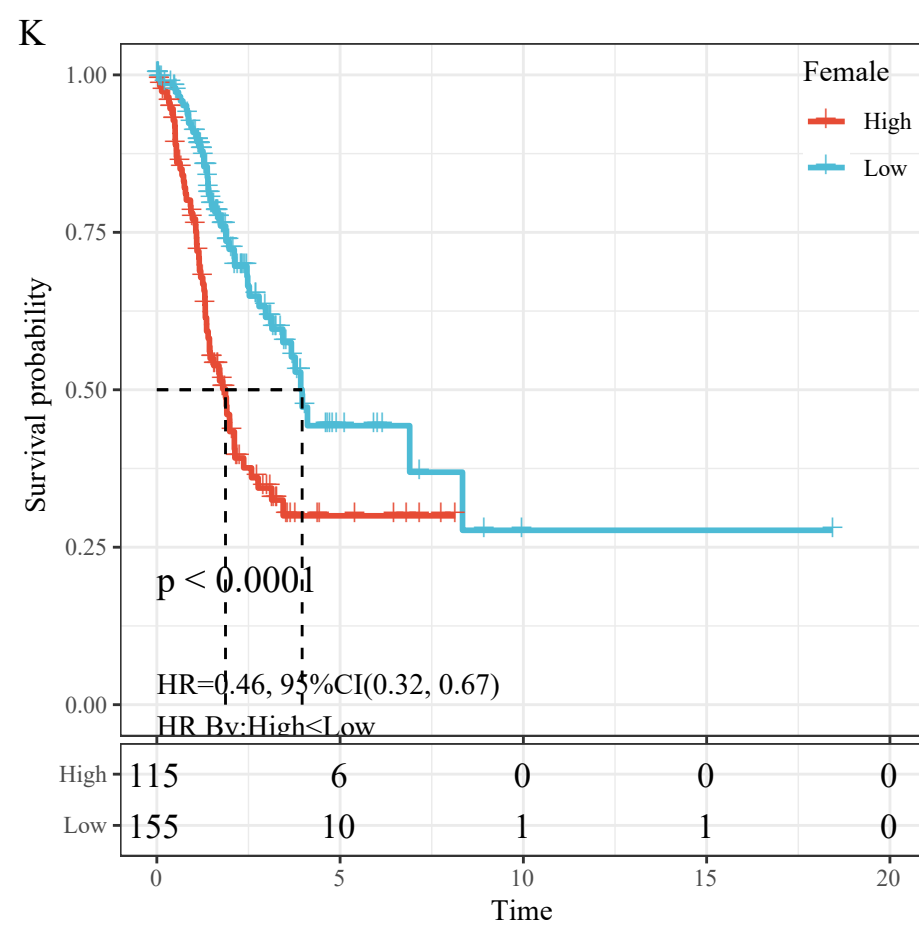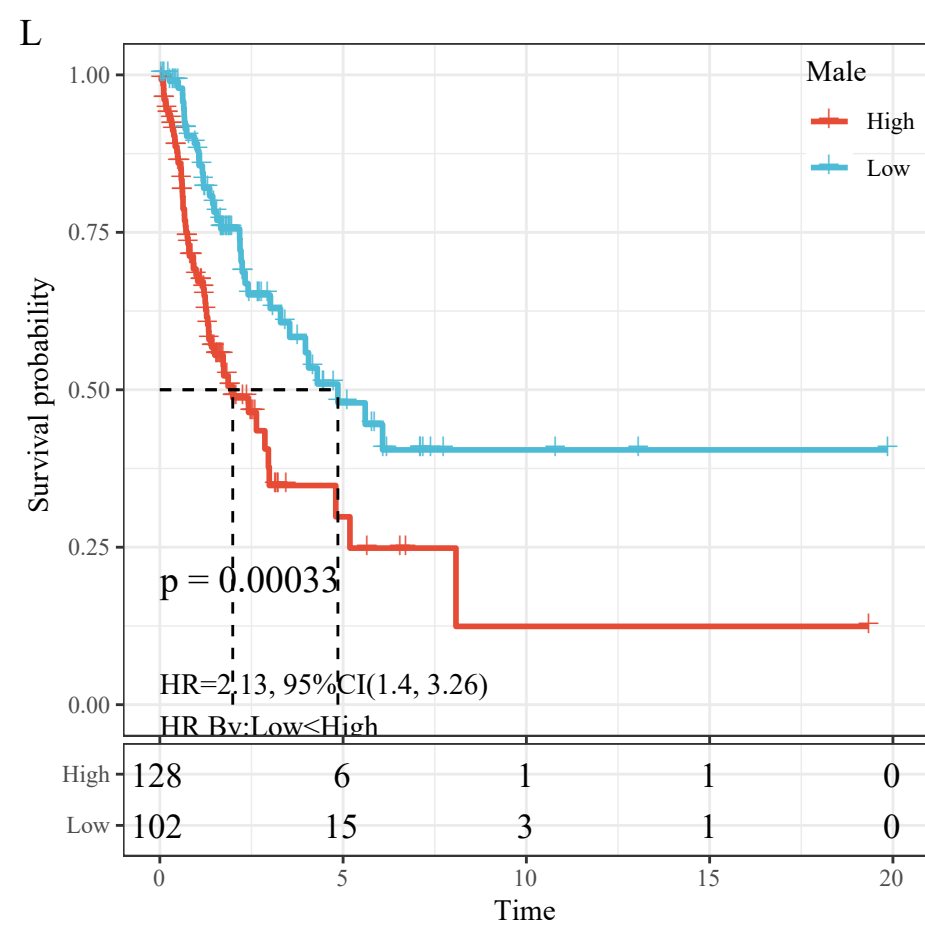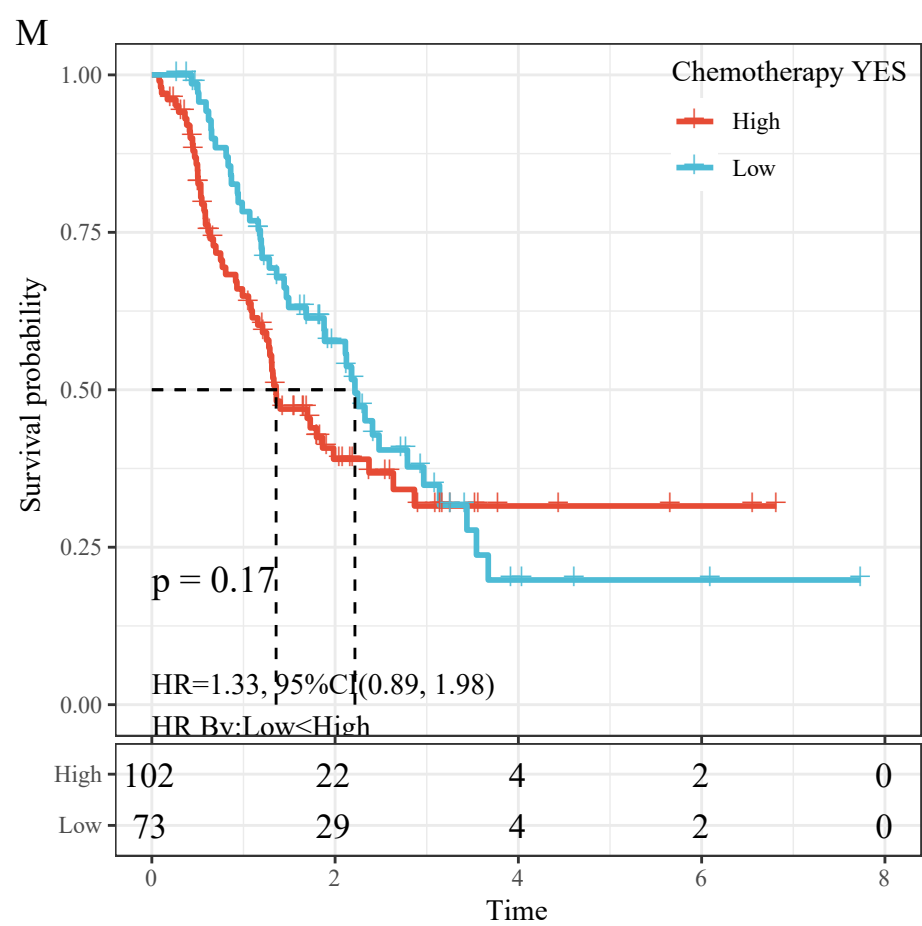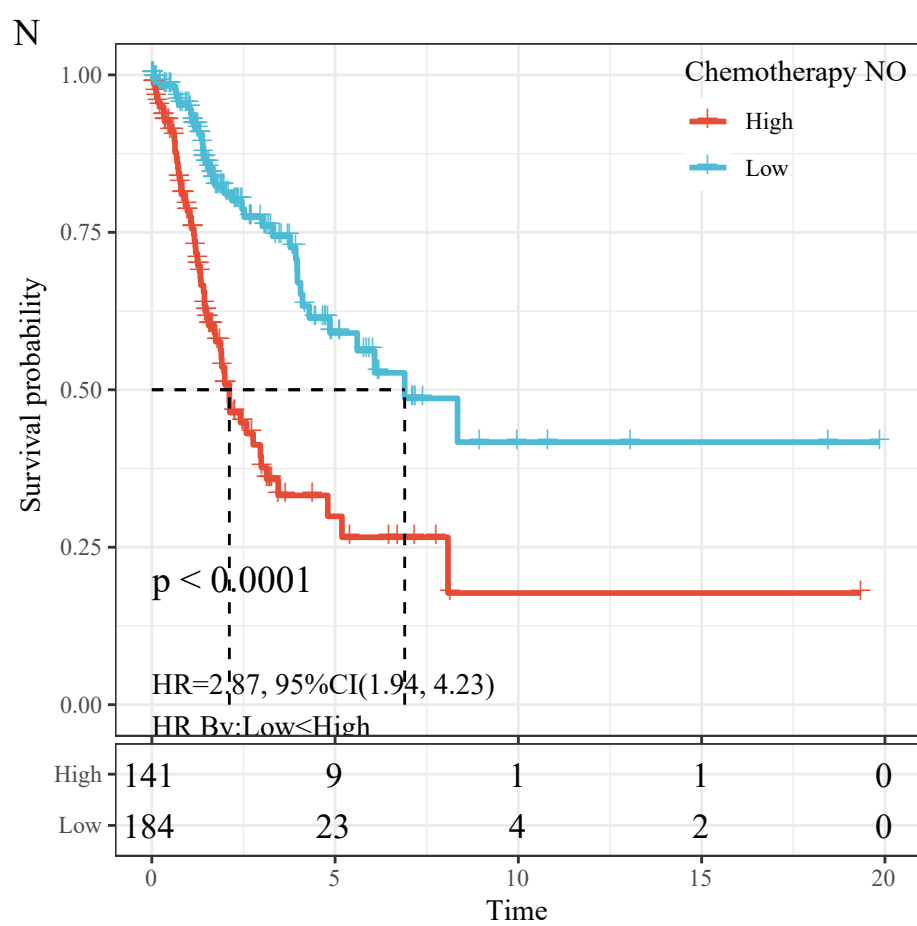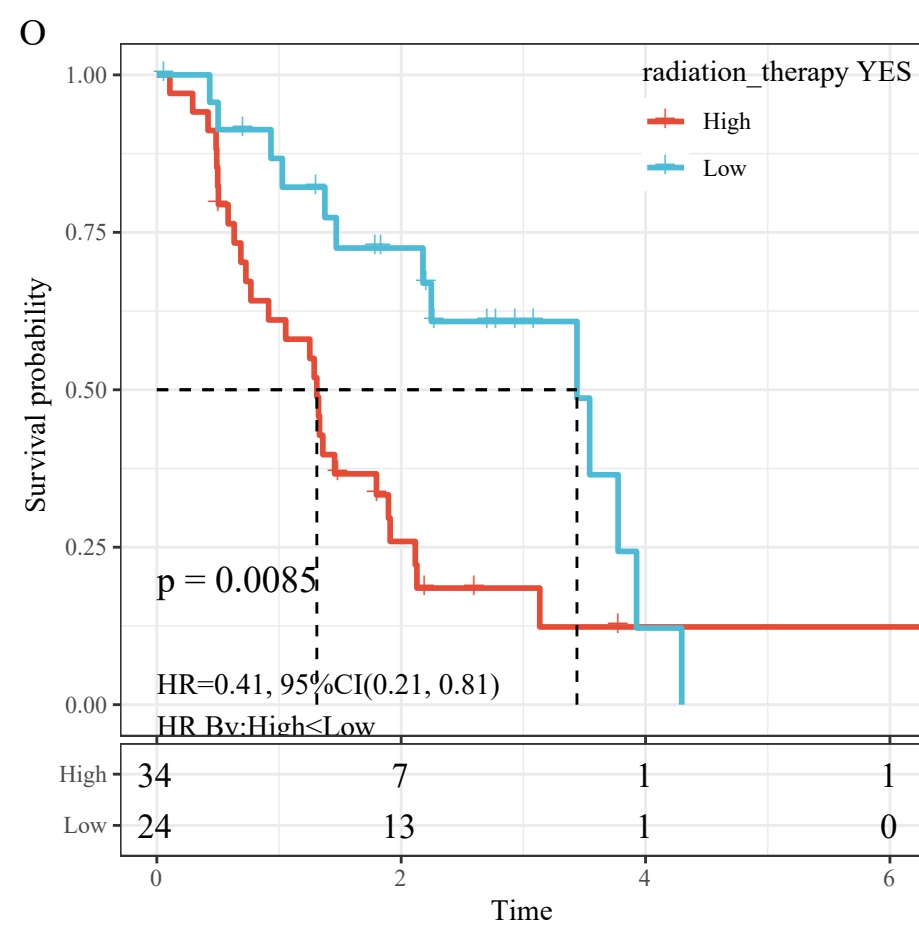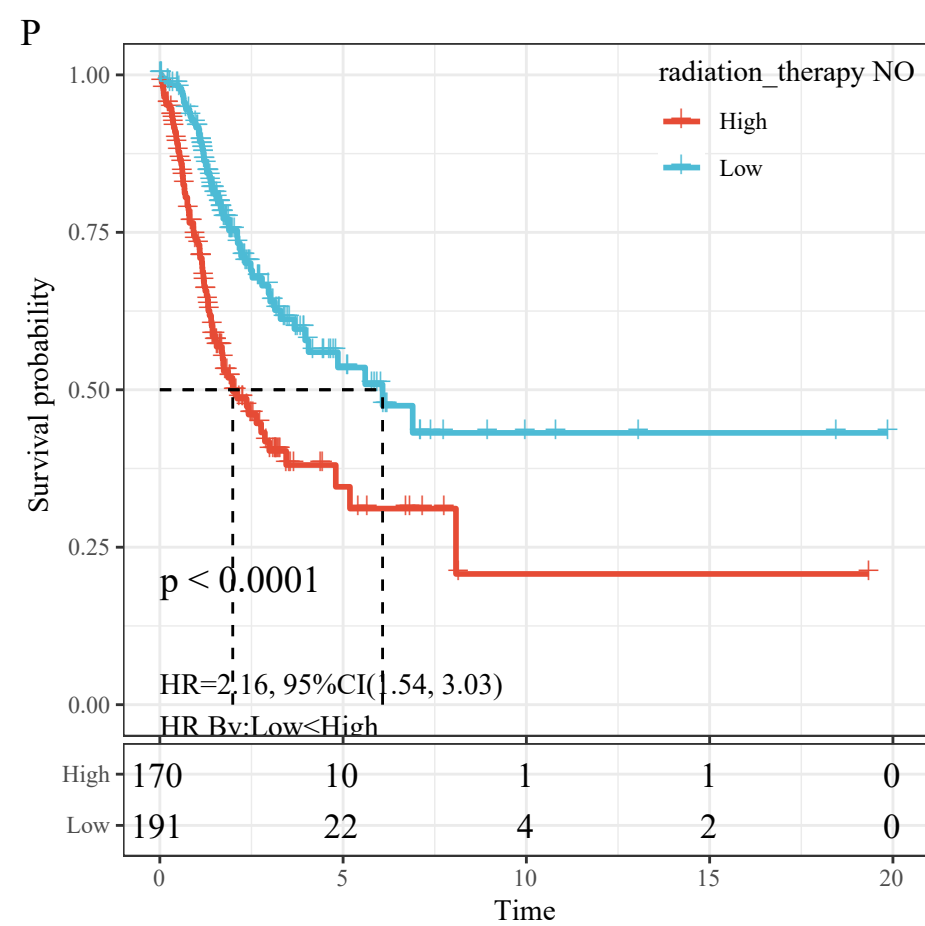

Supplement: f5 [file 6962163.f5.pdf]

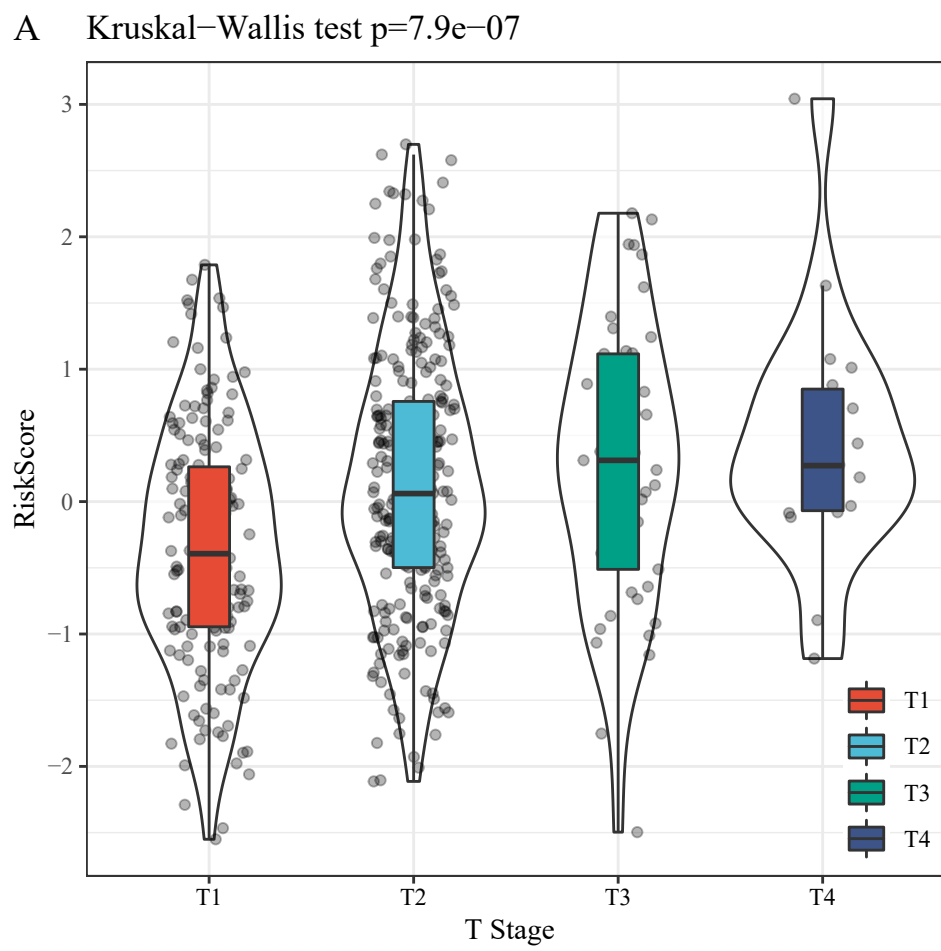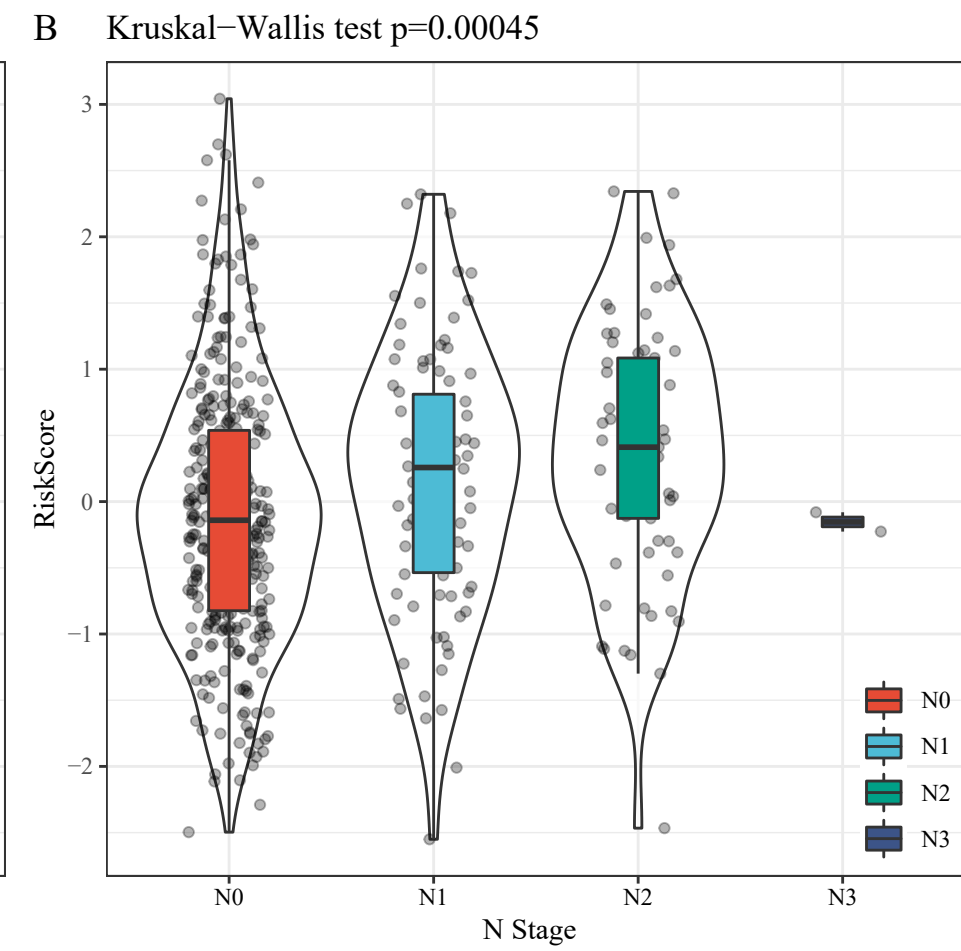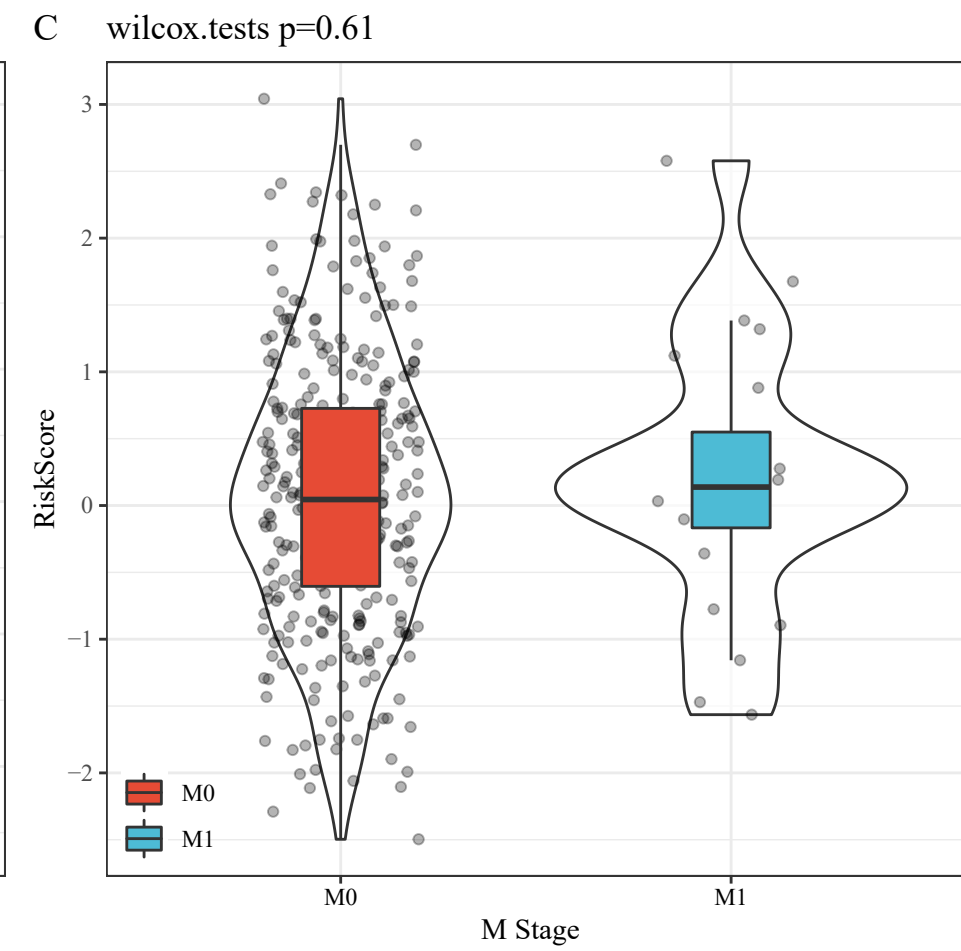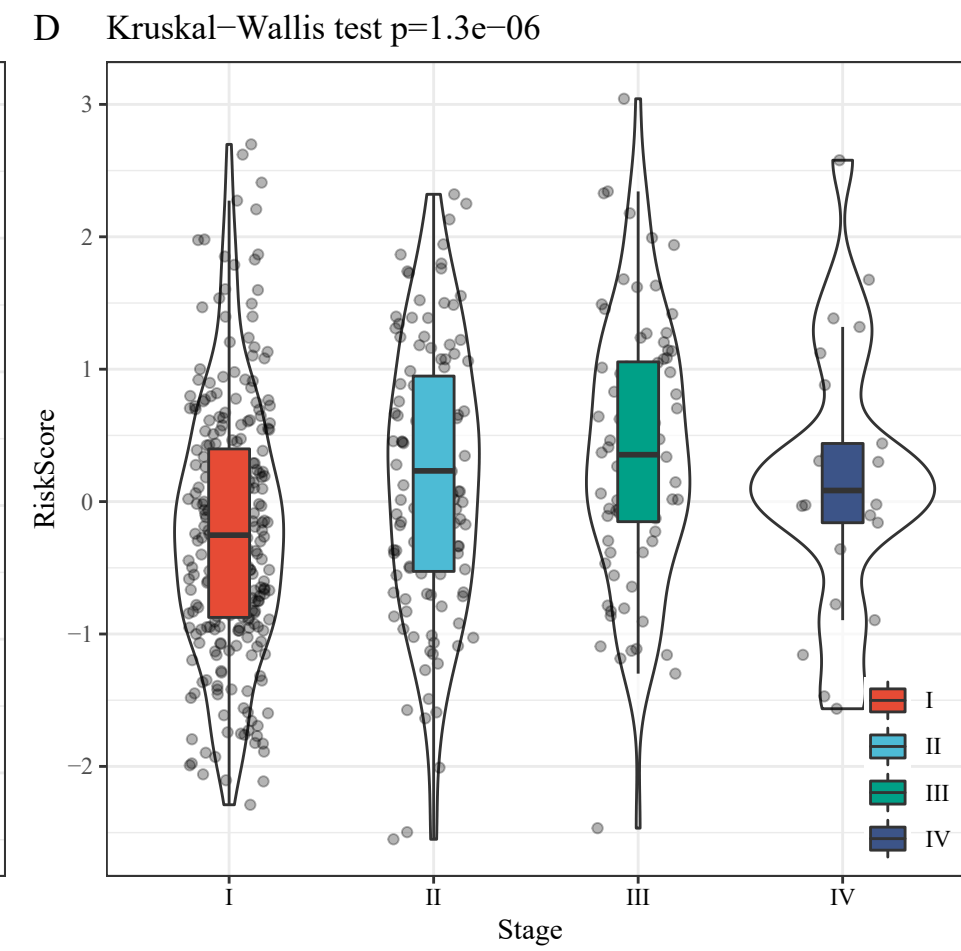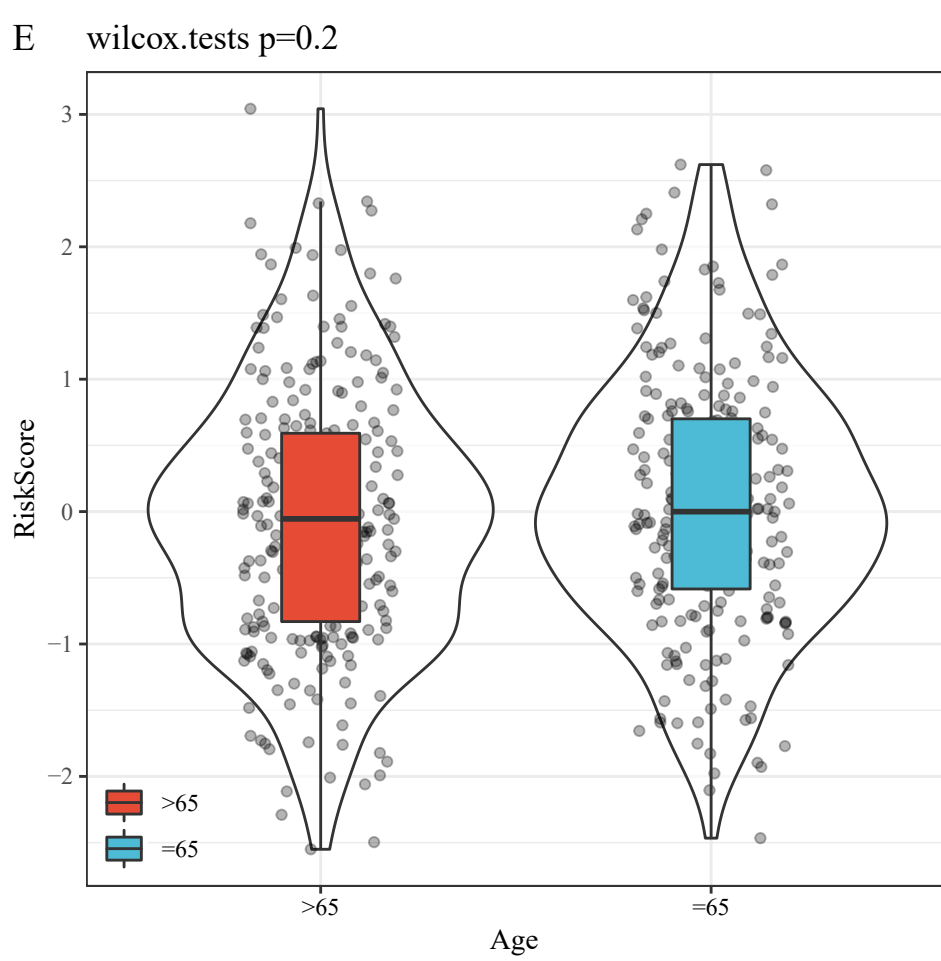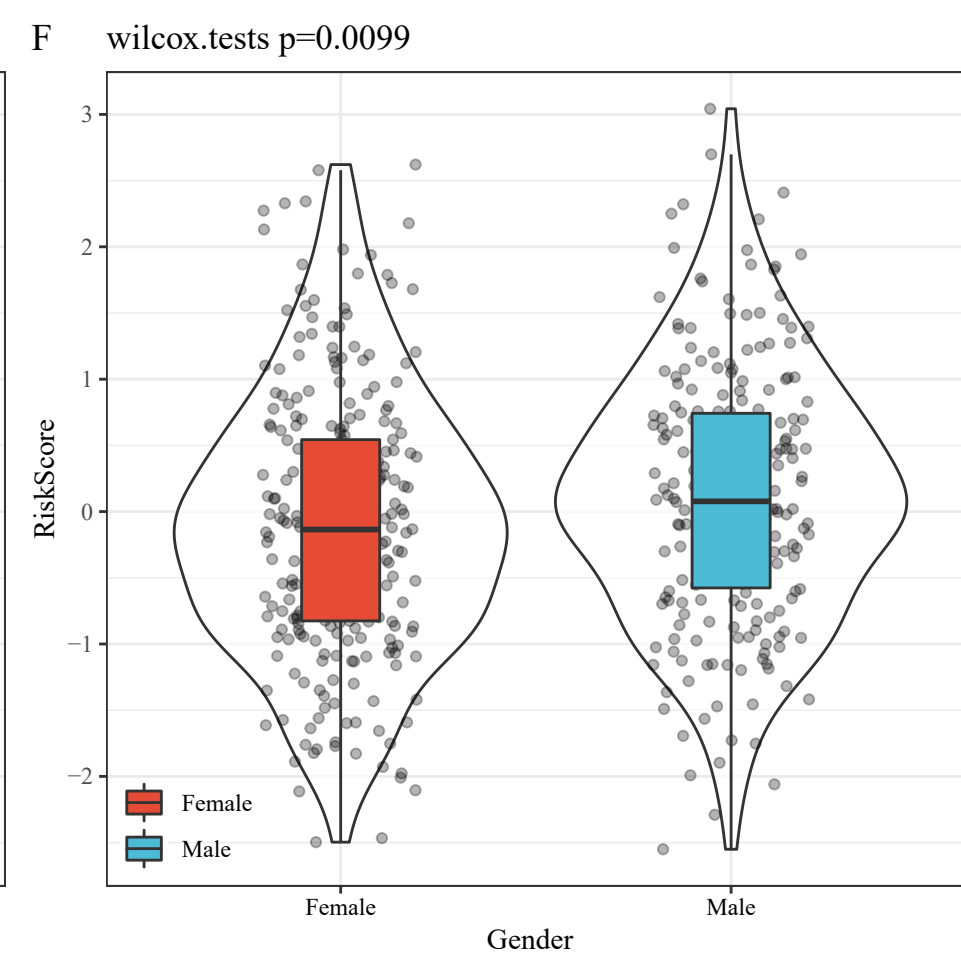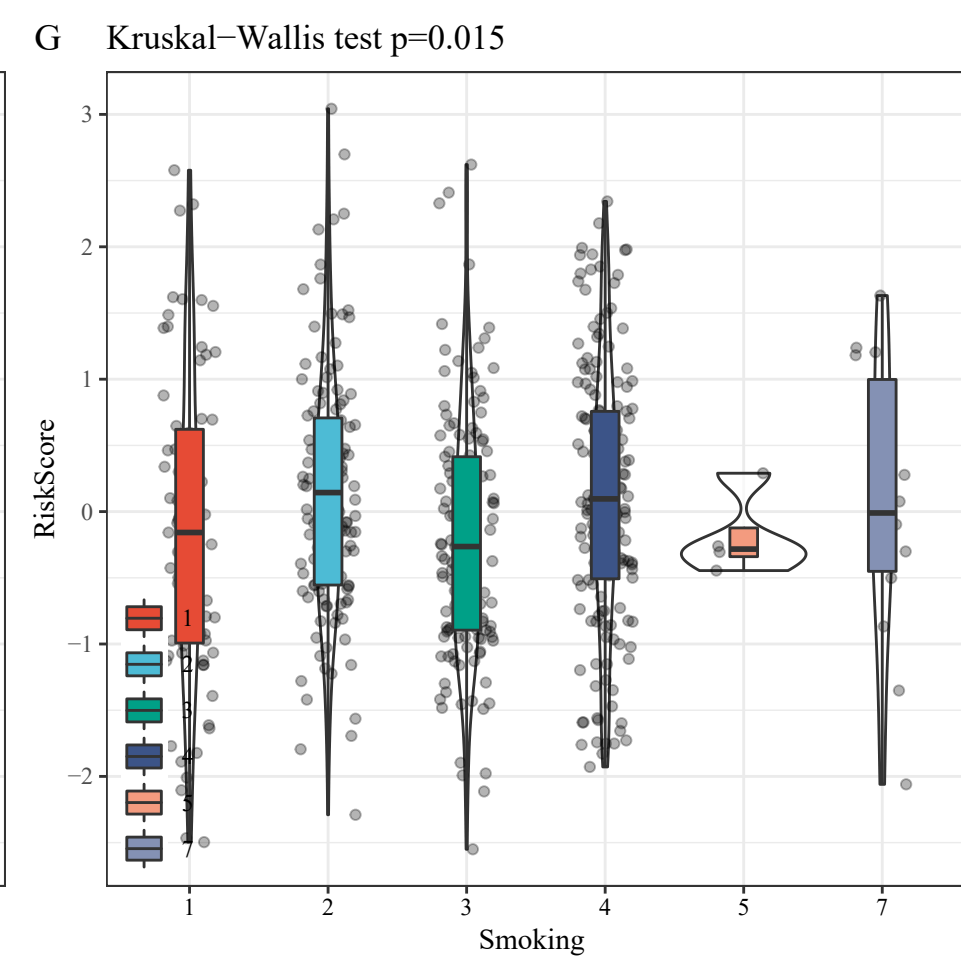

Supplement: f6 [file 6962163.f6.pdf]

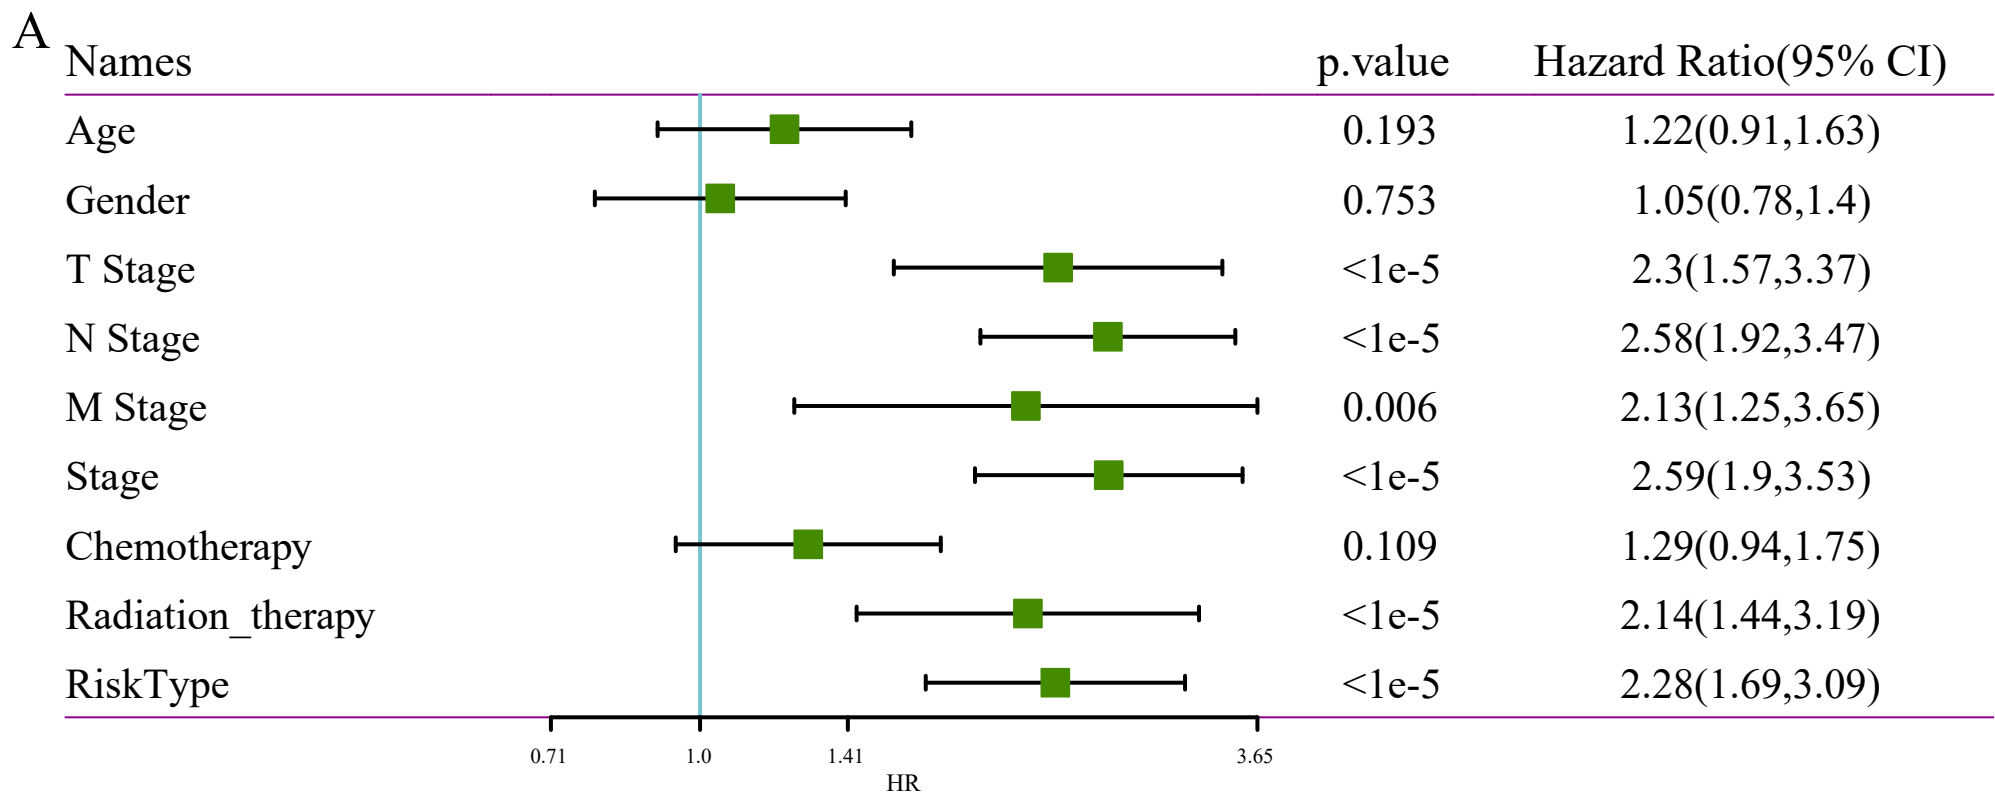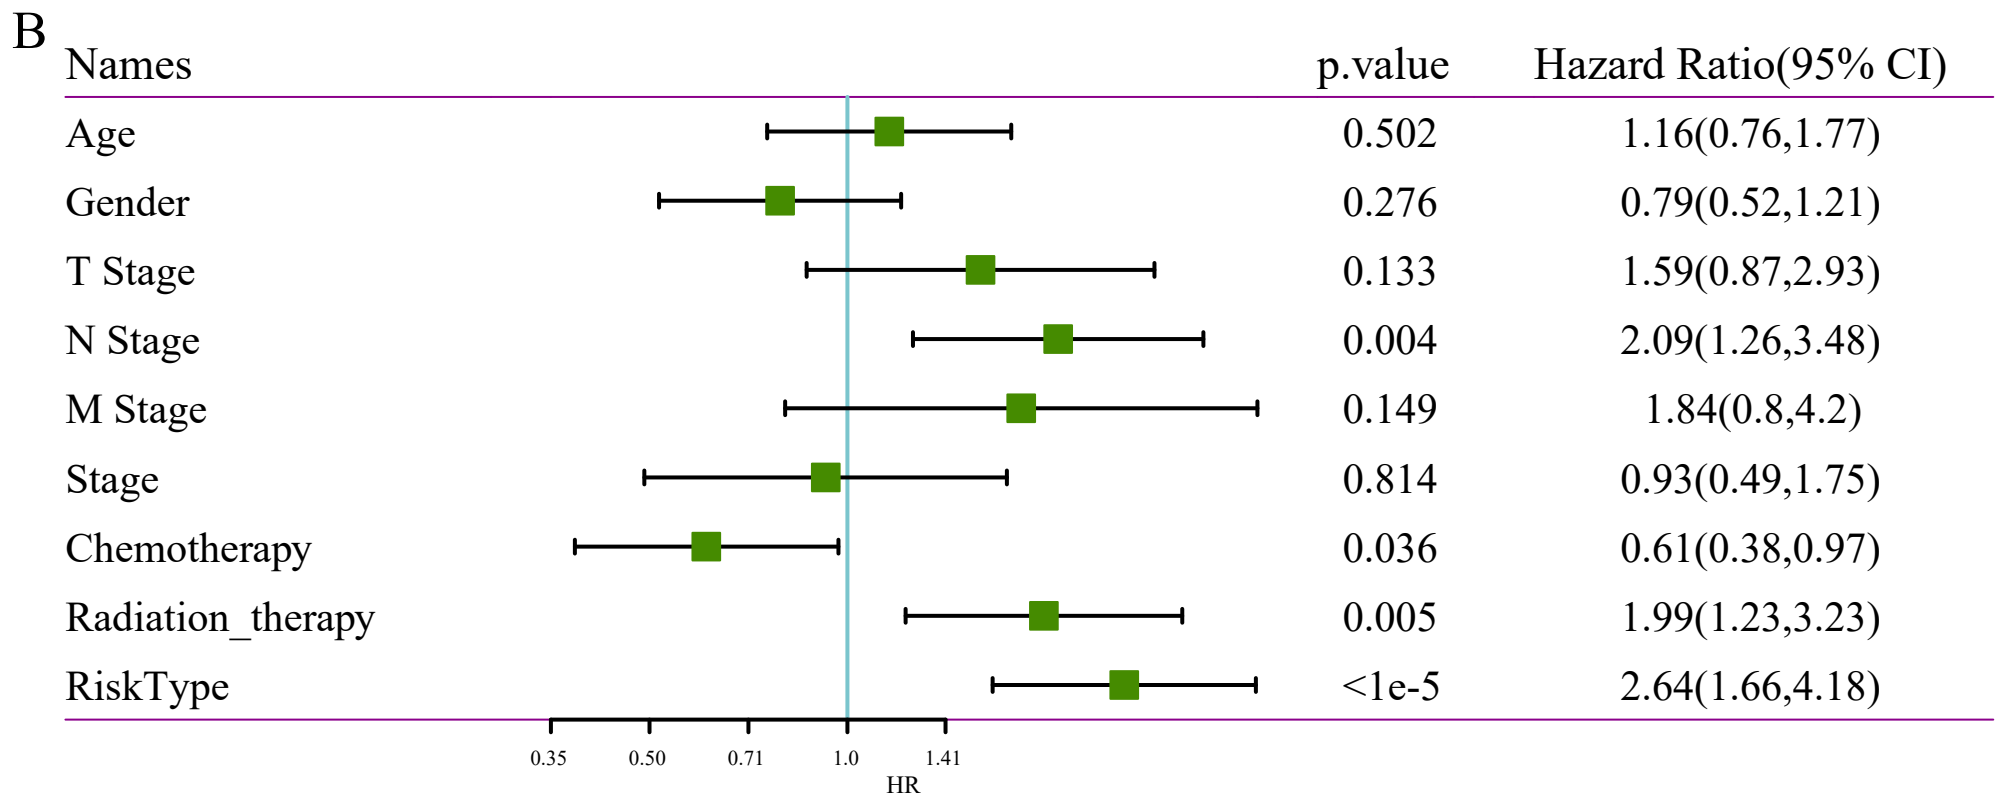

Supplement: f7 [file 6962163.f7.pdf]
